# Supplementary material for: Effectiveness of contact tracing apps for SARS-CoV-2: a rapid systematic review
Source: PubMed Central journal article supplement — BMJ Open. 2021 Jul 12;11(7):e050519. doi: 10.1136/bmjopen-2021-050519 (PMC8277487; doi:10.1136/bmjopen-2021-050519), 2021-07-12
Supplement: bmjopen-2021-050519.draft_revisions.pdf [file bmjopen-2021-050519.draft_revisions.pdf]

# BMJ Open

BMJ Open is committed to open peer review. As part of this commitment we make the peer review history of every article we publish publicly available.

When an article is published we post the peer reviewers' comments and the authors' responses online. We also post the versions of the paper that were used during peer review. These are the versions that the peer review comments apply to.

The versions of the paper that follow are the versions that were submitted during the peer review process. They are not the versions of record or the final published versions. They should not be cited or distributed as the published version of this manuscript.

BMJ Open is an open access journal and the full, final, typeset and author-corrected version of record of the manuscript is available on our site with no access controls, subscription charges or pay-per-view fees (<http://bmjopen.bmj.com>).

If you have any questions on BMJ Open's open peer review process please email [info.bmjopen@bmj.com](mailto:info.bmjopen@bmj.com)

# BMJ Open

## Effectiveness of contact tracing apps for SARS-CoV-2: a rapid systematic review

|                               |                                                                                                                                                                                                                                                                                                                                                                                                                                                                                                                                                                                                                                                                                                                                                                                                                                                                                                                                                                                                                                                                                                                                                                                                                                                                                                                                                                                                                                                                                                                                           |
|-------------------------------|-------------------------------------------------------------------------------------------------------------------------------------------------------------------------------------------------------------------------------------------------------------------------------------------------------------------------------------------------------------------------------------------------------------------------------------------------------------------------------------------------------------------------------------------------------------------------------------------------------------------------------------------------------------------------------------------------------------------------------------------------------------------------------------------------------------------------------------------------------------------------------------------------------------------------------------------------------------------------------------------------------------------------------------------------------------------------------------------------------------------------------------------------------------------------------------------------------------------------------------------------------------------------------------------------------------------------------------------------------------------------------------------------------------------------------------------------------------------------------------------------------------------------------------------|
| Journal:                      | <i>BMJ Open</i>                                                                                                                                                                                                                                                                                                                                                                                                                                                                                                                                                                                                                                                                                                                                                                                                                                                                                                                                                                                                                                                                                                                                                                                                                                                                                                                                                                                                                                                                                                                           |
| Manuscript ID                 | bmjopen-2021-050519                                                                                                                                                                                                                                                                                                                                                                                                                                                                                                                                                                                                                                                                                                                                                                                                                                                                                                                                                                                                                                                                                                                                                                                                                                                                                                                                                                                                                                                                                                                       |
| Article Type:                 | Original research                                                                                                                                                                                                                                                                                                                                                                                                                                                                                                                                                                                                                                                                                                                                                                                                                                                                                                                                                                                                                                                                                                                                                                                                                                                                                                                                                                                                                                                                                                                         |
| Date Submitted by the Author: | 23-Feb-2021                                                                                                                                                                                                                                                                                                                                                                                                                                                                                                                                                                                                                                                                                                                                                                                                                                                                                                                                                                                                                                                                                                                                                                                                                                                                                                                                                                                                                                                                                                                               |
| Complete List of Authors:     | <p>Jenniskens, Kevin; UMC Utrecht, Department of Epidemiology, Julius Center for Health Sciences and Primary Care; UMC Utrecht, Cochrane Netherlands, Julius Center for Health Sciences and Primary Care, Bootsma, Martin; Utrecht University Faculty of Science, Department of Mathematics, Faculty of Science; UMC Utrecht, Department of Epidemiology, Julius Center for Health Sciences and Primary Care Damen, Johanna; UMC Utrecht, Cochrane Netherlands, Julius Center for Health Sciences and Primary Care; UMC Utrecht, Department of Epidemiology, Julius Center for Health Sciences and Primary Care Oerbekke, Michiel; UMC Utrecht, Cochrane Netherlands, Julius Center for Health Sciences and Primary Care; Knowledge Institute of Medical Specialists</p> <p>Vernooij, Robin; UMC Utrecht, Cochrane Netherlands, Julius Center for Health Sciences and Primary Care; UMC Utrecht, Department of Epidemiology, Julius Center for Health Sciences and Primary Care Spijker, René; UMC Utrecht, Cochrane Netherlands, Julius Center for Health Sciences and Primary Care</p> <p>Moons, Karel; UMC Utrecht, Department of Epidemiology, Julius Center for Health Sciences and Primary Care</p> <p>Kretzschmar, Mirjam; UMC Utrecht, Department of Epidemiology, Julius Center for Health Sciences and Primary Care</p> <p>Hooft, Lotty; UMC Utrecht, Cochrane Netherlands, Julius Center for Health Sciences and Primary Care; UMC Utrecht, Department of Epidemiology, Julius Center for Health Sciences and Primary Care</p> |
| Keywords:                     | COVID-19, Epidemiology < INFECTIOUS DISEASES, MICROBIOLOGY, EPIDEMIOLOGY, STATISTICS & RESEARCH METHODS                                                                                                                                                                                                                                                                                                                                                                                                                                                                                                                                                                                                                                                                                                                                                                                                                                                                                                                                                                                                                                                                                                                                                                                                                                                                                                                                                                                                                                   |
|                               |                                                                                                                                                                                                                                                                                                                                                                                                                                                                                                                                                                                                                                                                                                                                                                                                                                                                                                                                                                                                                                                                                                                                                                                                                                                                                                                                                                                                                                                                                                                                           |

SCHOLARONE™  
Manuscripts

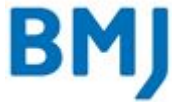

I, the Submitting Author has the right to grant and does grant on behalf of all authors of the Work (as defined in the below author licence), an exclusive licence and/or a non-exclusive licence for contributions from authors who are: i) UK Crown employees; ii) where BMJ has agreed a CC-BY licence shall apply, and/or iii) in accordance with the terms applicable for US Federal Government officers or employees acting as part of their official duties; on a worldwide, perpetual, irrevocable, royalty-free basis to BMJ Publishing Group Ltd ("BMJ") its licensees and where the relevant Journal is co-owned by BMJ to the co-owners of the Journal, to publish the Work in this journal and any other BMJ products and to exploit all rights, as set out in our [licence](#).

The Submitting Author accepts and understands that any supply made under these terms is made by BMJ to the Submitting Author unless you are acting as an employee on behalf of your employer or a postgraduate student of an affiliated institution which is paying any applicable article publishing charge ("APC") for Open Access articles. Where the Submitting Author wishes to make the Work available on an Open Access basis (and intends to pay the relevant APC), the terms of reuse of such Open Access shall be governed by a Creative Commons licence – details of these licences and which [Creative Commons](#) licence will apply to this Work are set out in our licence referred to above.

Other than as permitted in any relevant BMJ Author's Self Archiving Policies, I confirm this Work has not been accepted for publication elsewhere, is not being considered for publication elsewhere and does not duplicate material already published. I confirm all authors consent to publication of this Work and authorise the granting of this licence.

**Title**

Effectiveness of contact tracing apps for SARS-CoV-2: a rapid systematic review

**Authors**

Kevin Jenniskens, assistant professor<sup>1,2</sup>

Martin C.J. Bootsma, assistant professor<sup>1,3</sup>

Johanna A.A.G. Damen, assistant professor<sup>1,2</sup>

Michiel S. Oerbekke, PhD student<sup>1,2</sup>

Robin W.M. Vernooij, assistant professor<sup>1,2</sup>

René Spijker, information specialist<sup>2</sup>

Karel G.M. Moons, full professor<sup>1,2</sup>

Mirjam E.E. Kretzschmar, full professor<sup>1</sup>

Lotty Hoofst, associate professor<sup>1,2</sup>

**Affiliations**

<sup>1</sup> Julius Center for Health Sciences and Primary Care, University Medical Center Utrecht, Utrecht University, Utrecht, The Netherlands

<sup>2</sup> Cochrane Netherlands, University Medical Center Utrecht, Utrecht, The Netherlands

<sup>3</sup> Department of Mathematics, Faculty of Science, Utrecht University, The Netherlands

<sup>4</sup> Knowledge Institute of the Federation of Medical Specialists, Utrecht, The Netherlands

**Corresponding author's email address**

[K.Jenniskens@umcutrecht.nl](mailto:K.Jenniskens@umcutrecht.nl)

### **Funding & role of funding agency**

This research was funded directly (no grant number) by the Dutch Ministry of Health, Welfare and Sport. Researchers involved in this study contributed to the study's conception and execution independently from the funding agency, and as such it was in no way influenced by the funding agency.

### **Copyright statement**

The Corresponding Author has the right to grant on behalf of all authors and does grant on behalf of all authors, an exclusive licence (or non exclusive for government employees) on a worldwide basis to the BMJ Publishing Group Ltd to permit this article (if accepted) to be published in BMJ editions and any other BMJ PGL products and sublicences such use and exploit all subsidiary rights, as set out in our licence.

### **Competing interest statement**

All authors have completed the Unified Competing Interest form (available on request from the corresponding author) and declare: no support from any organisation for the submitted work [or describe if any]; no financial relationships with any organisations that might have an interest in the submitted work in the previous three years, no other relationships or activities that could appear to have influenced the submitted work

### **Transparency declaration**

The lead author affirms that the manuscript is an honest, accurate, and transparent account of the study being reported; that no important aspects of the study have been omitted.

### **Ethical approval**

No ethical approval was required for this study

### **Patient and public involvement statement**

No patients or public were involved in the conception and execution of this study

### **Dissemination statement**

We do not plan to further disseminate the results of this study apart from its publication

## Abstract

**Objective** – To systematically review evidence on effectiveness of contact tracing apps (CTAs) for SARS-CoV-2 on epidemiological and clinical outcomes

**Design** – Rapid systematic review

**Data sources** - EMBASE (OVID), MEDLINE (PubMed), BioRxiv, and MedRxiv were searched up to October 28<sup>th</sup>

**Study selection** – Studies, both empirical and model-based, assessing effect of CTAs for SARS-CoV-2 on reproduction number (R), total number of infections, hospitalization rate, mortality rate, and other epidemiologically and clinically relevant outcomes, were eligible for inclusion.

**Data extraction** – Empirical and model-based studies were critically appraised using separate checklists. Data on type of study (i.e. empirical or model-based), sample size, (simulated) time horizon, study population, CTA type (and associated interventions), comparator, and outcomes assessed, were extracted. The most important findings were extracted and narratively summarized. Specifically for model-based studies, characteristics and values of important model parameters were collected.

**Results** – 2140 studies were identified, of which 17 studies (two empirical, 15 model-based studies) were eligible and included in this review. Both empirical studies were observational (non-randomized) studies and at high risk of bias, most importantly due to risk of confounding. Risk of bias of model-based studies was considered low for 12 of 15 studies. Most studies demonstrated beneficial effects of CTAs on R, total number of infections, and mortality rate. No studies assessed effect on hospitalization. Effect size was dependent on model parameters values used, but in general a beneficial effect was observed at CTA adoption rates of 20% or higher.

**Conclusions** – Contact tracing apps have the potential to be effective in reducing SARS-CoV-2 related epidemiological and clinical outcomes, though effect size depends on other model parameters (e.g. proportion of asymptomatic individuals, or testing delays), and interventions after CTA notification. Methodologically sound comparative empirical studies on effectiveness of CTAs are required to confirm findings from model-based studies.

## Strengths and limitations of this study

- This is the first paper to provide a comprehensive overview and critical appraisal of studies assessing the effectiveness of contact tracing apps for SARS-CoV-2 on clinical and epidemiological outcomes
- Studies were retrieved using a large repository that is developed by a specific search string dedicated to identify studies on SARS-CoV-2 published in various underlying databases
- Critical appraisal was performed by reviewers from diverse backgrounds (i.e. mathematical modelling, epidemiology, medicine, systematic reviews) using predefined customized templates for both empirical and model-based effectiveness studies
- Given the rapid execution and (preprint) publication of studies on effectiveness of contact tracing apps for SARS-CoV-2, this review is unlikely to include the most recent studies that published after the search date
- Due to too much heterogeneity across studies, it was not feasible to provide a pooled meta-analysis estimate of the effectiveness of contact tracing apps for SARS-CoV-2 on the clinical and epidemiological outcomes

## Introduction

The severe acute respiratory syndrome coronavirus 2 (SARS-CoV-2) outbreak has dominated worldwide news and scientific research throughout 2020. Since the outbreak in Wuhan (People's Republic of China) in early December 2019, reducing transmission of SARS-CoV-2 has been a worldwide priority. Digital technology could be applied for efficient contact tracing. Contact tracing applications (CTAs) are able to identify individuals who have recently been in close contact with infected individuals (and may have acquired infection as a consequence). After identification, the contact person can be instructed to go in self-quarantine, preventing further transmission and spread of the virus.

A substantial amount of research on CTAs for SARS-CoV-2 has been performed since the start of the pandemic. Summarizing all evidence, including results from research that has not yet, or is currently undergoing peer-review, is warranted to provide an overview of what is known regarding CTA effectiveness. Research that has not yet undergone peer-review is often published by authors through so-called preprint databases. However, identifying these articles, extracting data, and drawing conclusions can be a challenge, as this requires knowledge on epidemiology, mathematical modelling, systematically appraising evidence, and summarizing that evidence.

A few overviews of evidence on effectiveness of CTAs have been published in recent time. Anglemyer *et al.* provided an overview of study characteristics and quality appraisal of studies on effectiveness of CTAs and other digital contact tracing technologies. (1) However, their data are based on both SARS-CoV-2 infections and other infections (e.g. Ebola), and lack a quantitative effectiveness measure of CTAs on clinically relevant outcomes. Other systematic reviews focused only on user experience in using a CTA for SARS-CoV-2 (2), or only studied manual as opposed to digital contact tracing (3). One systematic review did look into studies on automated and semi-automated CTAs for SARS-CoV-2, but lacked reporting on CTA effectiveness on total number of infections, and hospitalization or mortality rates. (4)

In this rapid systematic review, we aim to evaluate all (empirical and model based) studies addressing effectiveness of CTAs for SARS-CoV-2 on relevant, i.e. epidemiological and



1  
2  
3 clinical, outcomes. We will provide descriptive characteristics, critical appraisal, and a  
4 narrative summary of evidence of included studies.  
5  
6  
7

## 8 **Methods**

9

### 10 **Search strategy**

11 The *Bern COVID-19 Open Access Project (COAP)* database was used for identification of  
12 relevant research. The COAP database is comprised of research from EMBASE (OVID),  
13 MEDLINE (PubMed), BioRxiv en MedRxiv databases, specifically focused on SARS-CoV-2.  
14 On October 28<sup>th</sup> 2020 the COAP database was searched for scientific literature evaluating  
15 the effectiveness of CTAs for SARS-CoV-2 on epidemiological and clinical outcomes. The  
16 complete search strategy, as well as background information on the COAP database  
17 provided by Bern University, are provided in Supplementary File 1.  
18  
19  
20  
21  
22  
23

### 24 **Eligibility criteria**

25 Empirical (both observational and experimental) and model-based studies evaluating  
26 effectiveness of CTAs for SARS-CoV-2 were eligible for inclusion. Peer-reviewed  
27 publications as well as preprint papers were considered.  
28  
29  
30  
31

32 CTAs were considered when they provided feedback about potential recent exposure to  
33 an infected individual, based on proximity measurements (e.g. Bluetooth or GPS).  
34 Feedback should be provided directly to the individual through a CTA, although other  
35 feedback mechanisms, such as personal devices (e.g. a smartwatch), were also considered.  
36 National emergency warning systems using SMS were also included, provided they used  
37 proximity data to inform individuals.  
38  
39  
40  
41  
42

43 All epidemiologically or clinically relevant outcomes quantifying the impact of CTAs were  
44 considered, which include but are not limited to: the reproduction number (R), total  
45 number of infections, hospitalization rate, and mortality rate related to SARS-CoV-2.  
46 Studies investigating other relevant outcomes, such as prevention of outbreaks or a  
47 second infection wave of SARS-CoV-2, were also included. Studies assessing  
48 (determinants affecting) adoption rate of CTAs, temporal change in incidence SARS-CoV-  
49 2, or other non-epidemiological or clinical outcomes were excluded.  
50  
51  
52  
53  
54  
55  
56  
57  
58  
59  
60

## Study selection

Studies identified in the search were first screened independently on title and abstract by two reviewers. Relevant studies were included for full text screening, and further selection of articles was performed by two independent reviewers. Any discrepancies were discussed and resolved. When consensus was not reached, a third reviewer was consulted to provide the final judgement.

## Critical appraisal

Risk of bias was systematically assessed by two researchers using separate checklists for empirical and model-based studies. Discrepancies between researchers were discussed, and a final verdict was provided by a third reviewer if consensus was not reached. Empirical studies were appraised using a formal scoring method based on the Critical Appraisal Skills Programme (CASP) and Cochrane's Effective Practice and Organisation of Care (EPOC) checklists (5, 6) (Supplementary file 4). Risk of bias in model-based research was evaluated by assessing use of empirical input data for the model, number of scenarios analyzed, and transparency of model reporting. (Supplementary file 5)

## Data extraction

Data extraction was performed by one reviewer, and checked by a second reviewer. Descriptive characteristics on type of research, i.e. empirical or model-based, sample size, (simulated) time horizon, study population, CTA properties and intervention, comparator, and epidemiological and clinical outcomes studied, were extracted from all included studies.

Specifically for model-based research, model characteristics (i.e. type of model and distributions used) and values used for important model parameters were collected. Furthermore, CTA specific properties were extracted, such as the method of contact tracing used by these apps. Forward tracing CTAs can only detect the 'offspring', i.e. individuals the index case has infected, of an infected individual. Bidirectional tracing CTAs also detect the 'parents', i.e., the individual that infected the index case of an infected individual. Models were considered to use bidirectional (as opposed to forward) tracing when, after the index case is detected and registered, all contacts within a period of at least the incubation time are identified, such that the parent of the index case could be found.

1  
2  
3 Another CTA specific property included the use of 1-step-tracing or sequential tracing.  
4 When a CTA-identified individual could only notify their contacts after testing positive  
5 themselves, this was considered 1-step-contact tracing. When notified contacts could  
6 subsequently also notify their own contacts, creating a cascade, even before that  
7 individual has shown symptoms or received a positive test result for SARS-CoV-2, this was  
8 considered sequential tracing.  
9  
10  
11  
12

13 The most important findings regarding effectiveness of CTAs for SARS-CoV-2 on  
14 epidemiological and clinical outcomes were extracted, synthesized, and reported  
15 narratively. These outcomes were pooled quantitatively whenever it was feasible to do so.  
16  
17  
18  
19

## 20 **Results**

### 21 **Study selection**

22 A total of 2140 potential studies were identified by the search. After selection based on  
23 title and abstract, 2059 articles were excluded. Full texts of the 81 remaining studies were  
24 assessed, after which 17 articles were included for critical appraisal and data extraction  
25 (Supplementary file 2). The 64 excluded studies with their reasons for exclusion are  
26 summarized in Supplementary file 3.  
27  
28  
29  
30  
31  
32

### 33 **Characteristics of included studies**

34 Seventeen primary studies were included, of which two were empirical observational  
35 (non-randomized) studies, and 15 were model-based studies (Table 1).  
36  
37

38 Six of the 17 studies were published preprints, meaning they had not (yet) gone through  
39 the peer review process at the time of data extraction (7-12). Included studies focused  
40 predominantly on the general population, although some analyzed the effectiveness of  
41 CTAs for specific populations such as hospital personnel, or school children (8, 9, 11, 13-  
42 16). Especially in model-based studies, results were often presented graphically.  
43 Consequently, the effectiveness of CTAs on epidemiological and clinical outcomes was  
44 only partly, or not at all, reported in key numerical figures.  
45  
46  
47  
48  
49

50 The model-based studies typically assessed the effectiveness of CTAs by simulating one  
51 or more scenarios based on certain baseline or input values (e.g. proportion of  
52 asymptomatic infections). Table 2 provides an overview of characteristics and the most  
53 important input parameters used in models of the 15 included articles. Nine of the 15  
54 model-based studies evaluated forward tracing CTAs (8, 9, 11, 13-18), four studies  
55  
56  
57  
58  
59

1  
2  
3 analyzed bidirectional tracing CTAs (7, 10, 12, 19), and one used an alternative method  
4 (20). Four studies used a CTA that used sequential tracing (7, 10, 12, 19). All of these also  
5 used bidirectional CTAs, which are more effective than forward tracing CTAs in reducing  
6 R, but require quarantining many more contact persons. This is especially the case when  
7 a significant number of infections come from asymptomatic individuals (i.e. transmission  
8 from a case who does not (yet) have symptoms), who are unaware they have SARS-CoV-  
9 2. (19)

10  
11  
12  
13  
14  
15 The percentage of CTA adoption was varied in almost all studies, allowing for assessment  
16 of the impact of CTAs on epidemiological and clinical outcomes. Average incubation time,  
17 i.e. the mean time between infection and symptom onset of SARS-CoV-2, was estimated  
18 to be 5 to 6 days for SARS-CoV-2 (9, 11-21). The proportion of asymptomatic SARS-CoV-2  
19 infections, used as input parameter in model-based studies, was estimated at 20% to 50%  
20 based on empirical data (8, 9, 16, 18), but could vary between 18% to 86% (9). The baseline  
21 R value chosen in the model-based studies varied between 1.2 and 4.0. (7-10, 12, 14-21)

22  
23  
24  
25  
26  
27 Furthermore, so-called superspreaders (i.e. individuals that infect numerous other  
28 individuals, and consequently have a high individual R) were discussed in context of the  
29 SARS-CoV-2 pandemic. Tracing these superspreaders is key in containing outbreaks.  
30 Hence, it is warranted to use bidirectional CTAs to trace these superspreaders, and advise  
31 them to immediately enter quarantine on identification. (14, 22)

### 32 33 34 35 36 **Critical appraisal**

37 Risk of bias in the two empirical studies was judged to be high (Table 3) (23, 24).  
38 Confounding variables (such as smoking, work status, and income) were insufficiently  
39 taken into account given the explanatory and observational nature of these empirical  
40 studies. It was also unclear how missing (outcome) data were dealt with.

41  
42  
43  
44  
45 Most model-based research was judged to have a low risk of bias (Table 4). Three of the  
46 15 studies had a high risk of bias due to the lack of use of empirical distributions for  
47 variables, the limited number of scenarios analyzed, and insufficient transparency  
48 regarding reporting of the model. (11, 20, 21)

## Synthesis of results

### Evidence from empirical studies

Two empirical comparative observational studies assessed the effectiveness of CTAs compared to a control group that did not use CTAs (Table 1). (23, 24) One study looked at effectiveness of a text warning system used in 627,386 individuals who came in contact with an exposed population, and compared it to the general population of Taiwan who did not use such a warning system. (17) They showed a reduction in incidence of respiratory syndrome from 19.23 to 16.87 per 1000 individuals. They also showed a reduction in pneumonia incidence from 3.81 to 2.36 per 1000 individuals. (17) The second observational study investigated the introduction and adoption of a 'Test and Trace' app by 34,000 individuals living on the Isle of Wight (UK), and compared the estimated value of  $R$  in that region to that in the general UK population. (24) The CTA marked individuals as positive based on self-reporting of symptoms. Individuals that came in contact with an individual marked as positive were provided with social distancing advice. The study found that  $R$  was reduced from 1.3 to 0.5 after implementation of the CTA. Within 2 to 3 weeks after implementation, incidence of SARS-CoV-2 diagnoses declined by around 90%. (24)

### Evidence from model-based studies

#### Effect on $R$

Effectiveness of a 1-step-contact tracing in reducing  $R$  can be approached using the following formula:

$$R_c = R * (1 - p^2 * f)$$

Here,  $R_c$  is the reproduction number when a CTA is used,  $R$  is the reproduction number without the use of a CTA,  $p$  is the proportion of the population using the CTA, and  $f$  is the combination of other factors that affect effectiveness of notification by the CTA. Such factors include, but are not limited to, delay between CTA notification and testing, delay between testing and test result, delay between reception of test result and entry of that result in the CTA, compliance to interventions (e.g. self-quarantine), and the proportion of infections that occur pre- or asymptotically. Note that  $p$  occurs as a quadratic term, which reflects the fact that both infector and infectee have to use the CTA for the transmission to get traced.

1  
2  
3  
4  
5  
6  
7  
8  
9  
10  
11  
12  
13  
14  
15  
16  
17  
18  
19  
20  
21  
22  
23  
24  
25  
26  
27  
28  
29  
30  
31  
32  
33  
34  
35  
36  
37  
38  
39  
40  
41  
42  
43  
44  
45  
46  
47  
48  
49  
50

Nine of the 15 model-based studies assessed the effect of CTAs on reduction of R. (8, 11, 14-16, 18, 19, 21) CTAs were able to control an ongoing outbreak or epidemic through quicker and more efficient feedback of a positive test result, and by notifying close contacts of a positively tested individual. (15, 16, 19) This speed and efficiency were not feasible using traditional manual contact tracing. (16) New outbreaks could be controlled (i.e.  $R_c < 1.0$ ) by CTAs, by combining them with quarantine or self-isolation interventions, provided that hygiene and social distancing measures are maintained. (8, 14, 18, 21) CTAs were able to reduce R by 0.3 more than traditional manual contact tracing, provided that feedback about contact with a positively tested individual is given to all contacts of the index case of the preceding 7 days. (19) Another model-based study demonstrated that a CTA with 20% adoption rate reduces R by 17.6% compared to no contact tracing, whereas traditional manual contact tracing reduced R by 2.5% compared to no contact tracing. (15) This study also demonstrated that a CTA is able to reduce the R further, even when social distancing has already reduced R to 1.2. In this situation, R can be reduced further by 30% to 0.8 when CTA adoption rate is 80%. (15) Another model-based study determined that 60% adoption rate of a CTA could result in an R below 1.0. (11) In one study, adoption rate of 53% resulted in a 47% reduction in R when the complete household of an individual with a positive test result is advised to be quarantined. (14) The last study looking at effect of CTA on R showed that only at 60% adoption rate of the app a significant beneficial effect on R would become apparent. (12) When R is high (e.g. 3.0), and a considerable proportion of individuals is asymptomatic (e.g. 40% of all infections), CTAs need to be combined with other interventions (such as social distancing and random testing) to be able to lower the R below 1.0. (12) Potential for CTAs to reduce R is not only dependent on the adoption rate of the app, but also on (effectiveness of) various other measures that are provided after a positive notification, the delay between positive notification and opportunity for testing, and delay between receiving a positive test result and sharing that result through the CTA. (5, 6, 10) One study found that the percentage of preventable infections by one individual strongly depends on the time delay between CTA notification and the ability to be tested. (15) When there was no delay (i.e. 0 days) 79.9% of infections could be prevented, compared to 41.8% and 4.9% for 3 and 7 days delay respectively.

### 51 52 53 Effect on total number of infections

54  
55  
56  
57  
58  
59  
60

Eight of the 15 model-based studies assessed the effect of CTAs on reducing the total number of infections. (8-11, 13, 17, 18, 20) Two studies indicated that the success of CTAs

1  
2  
3 in reducing the total number of infections could only be ensured with a high adoption  
4 rate of that app. (8, 13) Another study showed that with a high CTA adoption rate of 75%,  
5 there would be no more new infections occurring within three months after  
6 implementation. (11) It was found that adequate hygiene and social distancing measures  
7 are needed to enable CTAs to reduce the total number of infections. (8, 9, 17, 18) Especially  
8 in areas where there is low compliance to social distancing, a sufficiently high adoption  
9 rate of a CTA is essential to maintain control of an outbreak. (9)  
10  
11  
12  
13  
14

15  
16 The height of the peak number of new infections can, according to one study, be reduced  
17 by half with a 50% adoption rate of a CTA (18), whereas another study showed that this  
18 could be achieved with an adoption rate as low as 20%. (20) Another study demonstrated  
19 that at 27% CTA adoption rate, a quarter of all new infections can be prevented. (17)  
20 However, according to another study that used a similar adoption rate, the number of  
21 infections would stabilize, but the epidemic would be maintained by core groups in  
22 densely populated areas. (18) There may be a period of time of more than two months  
23 between implementation of interventions (such as CTAs) and the effect of that  
24 implementation on the total number of SARS-CoV-2 infections. (13)  
25  
26  
27  
28  
29  
30

### 31 Effect on number of hospitalizations

32  
33 None of the 15 model-based studies assessed the effect of CTAs on the number of  
34 hospitalizations due to SARS-CoV-2 infection, possibly because the number of  
35 hospitalizations is expected to be proportional to the number of infections, only with a  
36 time-delay. A German study did look into the effect of a CTA on the number of days that  
37 intensive care unit (ICU) capacity was exceeded. (9) They found in their simulations that –  
38 based on the German population, and assuming an ICU capacity of 24.000 beds – a CTA  
39 adoption rate of 20% would prevent exceedance of ICU capacity at any point in time. In  
40 contrast, if no contact tracing (either manual or digital) would be used, ICU capacity would  
41 be exceeded on a quarter of days.  
42  
43  
44  
45  
46  
47

### 48 Effect on mortality rate

49  
50 Three of the 15 model-based studies assessed the effect of CTAs on mortality rate. (9, 18,  
51 20) One study demonstrated that a high adoption rate (80%) of a CTA would result in an  
52 85% reduction in mortality rate, over a period of 500 days (9). Another study found that a  
53 low CTA adoption rate (25%) is associated with a 10% decrease in mortality rate, an  
54 average adoption rate (50%) with 25% decrease, and a high adoption rate (75%) with 40-  
55  
56  
57  
58  
59  
60



1  
2  
3 60% decrease. (18) A third study showed that at 40% adoption rate, during the peak of  
4 an outbreak, a reduction in number of deaths by 97% could be achieved. (20)  
5  
6  
7

## 8 **Discussion**

9  
10 Empirical evidence regarding the effectiveness of using CTAs for detection of SARS-CoV-2  
11 is still limited. Currently, no randomized studies have been performed, and only two  
12 observational comparative studies were identified in this systematic review. Although  
13 some benefits of using CTAs for detection of SARS-CoV-2 were observed, both studies  
14 were deemed to be of low methodological quality. However, the results of these studies  
15 were in accordance with the 15 included, higher quality, model-based studies assessing  
16 effectiveness of CTAs. These studies showed that CTAs can be effective and a valuable  
17 addition to manual contact tracing. CTA use resulted in a lower R, lower total number of  
18 infections, and lower mortality rate. These reductions were already observed at relatively  
19 low adoption rates (e.g. 20%), though higher adoption rates of CTAs resulted in greater  
20 reductions. Shortening delays between CTA notification and diagnostic testing may  
21 increase its effectiveness.  
22  
23  
24  
25  
26  
27  
28

29  
30 This rapid systematic review assesses key features, quality, and main clinical and  
31 epidemiological outcomes of a set of studies, both empirical and model-based, on  
32 effectiveness of CTAs for SARS-CoV-2. To our knowledge, no such systematic review has  
33 been published, assessing these specific properties. Methodological quality of empirical  
34 studies was assessed using standardized tools. No such tool was available in literature for  
35 model-based studies, and as such a set of key features used in other systematic reviews  
36 on this topic was used. This set was validated by experts in mathematical modelling.  
37  
38  
39  
40  
41  
42

43 To fully appreciate the findings from this systematic review, some considerations should  
44 be taken into account. First, the studies found through the literature search may not be a  
45 comprehensive set. Studies on SARS-CoV-2 are published at a rapid, almost daily, basis  
46 in various online repositories. Although we cannot ensure that all studies on the  
47 effectiveness of CTAs for SARS-CoV-2 have been identified, we believe that the set of  
48 included studies that we have identified represents a representative sample.  
49  
50  
51

52  
53 Furthermore, effectiveness of CTAs for SARS-CoV-2 described in model-based studies is  
54 complex. Numerous input variables used in the models interact with one another, and  
55  
56  
57  
58



1  
2  
3 consequently affect effectiveness of, for example, adoption rate of CTAs on clinical or  
4 epidemiological outcomes. Summarizing these findings into a general effectiveness is  
5 difficult, and will always suffer from simplification of a system of complex interactions.  
6  
7  
8 Though we feel that providing some (conditional) findings from these studies will help  
9 provide some general insight in the impact CTAs can have on clinical and epidemiological  
10 outcomes for SARS-CoV-2.  
11  
12  
13

14 Current evidence on the effectiveness of CTAs for SARS-CoV-2 is predominantly based on  
15 modelling studies, which indicate that there is potential in beneficially affecting key clinical  
16 and epidemiological outcomes. High quality empirical evidence, either from experimental  
17 or methodologically sound observational studies, is needed in order to be able to draw  
18 more robust conclusions regarding effectiveness of CTAs for SARS-CoV-2.  
19  
20  
21  
22  
23  
24  
25  
26  
27  
28  
29  
30  
31  
32  
33  
34  
35  
36  
37  
38  
39  
40  
41  
42  
43  
44  
45  
46  
47  
48  
49  
50  
51  
52  
53  
54  
55  
56  
57  
58  
59  
60

## References

1. Anglemyer A, Moore TH, Parker L, Chambers T, Grady A, Chiu K, et al. Digital contact tracing technologies in epidemics: a rapid review. *Cochrane Database Syst Rev.* 2020;8:CD013699.
2. Davalbhakta S, Advani S, Kumar S, Agarwal V, Bhojar S, Fedirko E, et al. A Systematic Review of Smartphone Applications Available for Corona Virus Disease 2019 (COVID19) and the Assessment of their Quality Using the Mobile Application Rating Scale (MARS). *J Med Syst.* 2020;44(9):164.
3. Nussbaumer-Streit B, Mayr V, Dobrescu AI, Chapman A, Persad E, Klerings I, et al. Quarantine alone or in combination with other public health measures to control COVID-19: a rapid review. *Cochrane Database Syst Rev.* 2020;4:CD013574.
4. Braithwaite I, Callender T, Bullock M, Aldridge RW. Automated and partly automated contact tracing: a systematic review to inform the control of COVID-19. *Lancet Digit Health.* 2020;2(11):e607-e21.
5. CASP Checklist [Internet]. Critical appraisal skills programme. 2018 [cited 15-10-2020]. Available from: [https://casp-uk.net/wp-content/uploads/2018/01/CASP-Cohort-Study-Checklist\\_2018.pdf](https://casp-uk.net/wp-content/uploads/2018/01/CASP-Cohort-Study-Checklist_2018.pdf).
6. EPOC Resources for review authors [Internet]. Cochrane Effective Practice and Organisation of Care (EPOC). 2017 [cited 15-10-2020]. Available from: <https://epoc.cochrane.org/resources/epoc-resources-review-authors>.
7. Bulchandani VB, Shivam S, Moudgalya S, Sondhi SL. Digital Herd Immunity and COVID-19. *medRxiv.* 2020:2020.04.15.20066720.
8. Cencetti G, Santin G, Longa A, Pigani E, Barrat A, Cattuto C, et al. Digital Proximity Tracing in the COVID-19 Pandemic on Empirical Contact Networks. *medRxiv.* 2020:2020.05.29.20115915.
9. Grimm V, Mengel F, Schmidt M. Extensions of the SEIR Model for the Analysis of Tailored Social Distancing and Tracing Approaches to Cope with COVID-19. *medRxiv.* 2020:2020.04.24.20078113.
10. Guttal V, Krishna S, Siddharthan R. Risk assessment via layered mobile contact tracing for epidemiological intervention. *medRxiv.* 2020:2020.04.26.20080648.
11. Shamil MS, Farheen F, Ibtehaz N, Khan IM, Rahman MS. An Agent Based Modeling of COVID-19: Validation, Analysis, and Recommendations. *medRxiv.* 2020:2020.07.05.20146977.
12. Pollmann TR, Pollmann J, Wiesinger C, Haack C, Shtembari L, Turcati A, et al. The impact of digital contact tracing on the SARS-CoV-2 pandemic - a comprehensive modelling study. *medRxiv.* 2020:2020.09.13.20192682.
13. Scott N, Palmer A, Delpont D, Abey Suriya R, Stuart RM, Kerr CC, et al. Modelling the impact of relaxing COVID-19 control measures during a period of low viral transmission. *Med J Aust.* 2021;214(2):79-83.
14. Kucharski AJ, Klepac P, Conlan AJK, Kissler SM, Tang ML, Fry H, et al. Effectiveness of isolation, testing, contact tracing, and physical distancing on reducing transmission of SARS-CoV-2 in different settings: a mathematical modelling study. *Lancet Infect Dis.* 2020;20(10):1151-60.
15. Kretzschmar ME, Rozhnova G, Bootsma MCJ, van Boven M, van de Wijgert J, Bonten MJM. Impact of delays on effectiveness of contact tracing strategies for COVID-19: a modelling study. *Lancet Public Health.* 2020;5(8):e452-e9.
16. Ferretti L, Wymant C, Kendall M, Zhao L, Nurtay A, Abeler-Dörner L, et al. Quantifying SARS-CoV-2 transmission suggests epidemic control with digital contact tracing. *Science.* 2020;368(6491):eabb6936.
17. Currie DJ, Peng CQ, Lyle DM, Jameson BA, Frommer MS. Stemming the flow: how much can the Australian smartphone app help to control COVID-19? *Public Health Res Pract.* 2020;30(2).
18. Ferrari A, Santus E, Cirillo D, Ponce-de-Leon M, Marino N, Ferretti MT, et al. Simulating SARS-CoV-2 epidemics by region-specific variables and modeling contact tracing app containment. *NPJ Digit Med.* 2021;4(1):9.

- 1  
2  
3 19. Bradshaw WJ, Alley EC, Huggins JH, Lloyd AL, Esvelt KM. Bidirectional contact tracing could  
4 dramatically improve COVID-19 control. *Nat Commun.* 2021;12(1):232.  
5  
6 20. Nuzzo A, Tan CO, Raskar R, DeSimone DC, Kapa S, Gupta R. Universal Shelter-in-Place Versus  
7 Advanced Automated Contact Tracing and Targeted Isolation: A Case for 21st-Century Technologies for  
8 SARS-CoV-2 and Future Pandemics. *Mayo Clin Proc.* 2020;95(9):1898-905.  
9  
10 21. Kurita J, Sugawara T, Ohkusa Y. Estimated effectiveness of school closure and voluntary event  
11 cancellation as COVID-19 countermeasures in Japan. *J Infect Chemother.* 2021;27(1):62-4.  
12  
13 22. Endo A, Leclerc QJ, Knight GM, Medley GF, Atkins KE, Funk S, et al. Implication of backward  
14 contact tracing in the presence of overdispersed transmission in COVID-19 outbreak. *medRxiv.*  
15 2020:2020.08.01.20166595.  
16  
17 23. Chen CM, Jyan HW, Chien SC, Jen HH, Hsu CY, Lee PC, et al. Containing COVID-19 Among  
18 627,386 Persons in Contact With the Diamond Princess Cruise Ship Passengers Who Disembarked in  
19 Taiwan: Big Data Analytics. *J Med Internet Res.* 2020;22(5):e19540.  
20  
21 24. Kendall M, Milsom L, Abeler-Dorner L, Wymant C, Ferretti L, Briers M, et al. Epidemiological  
22 changes on the Isle of Wight after the launch of the NHS Test and Trace programme: a preliminary  
23 analysis. *Lancet Digit Health.* 2020;2(12):e658-e66.  
24  
25  
26  
27  
28  
29  
30  
31  
32  
33  
34  
35  
36  
37  
38  
39  
40  
41  
42  
43  
44  
45  
46  
47  
48  
49  
50  
51  
52  
53  
54  
55  
56  
57  
58  
59  
60

### Table 1. Descriptive characteristics of included studies

Characteristics of empirical epidemiological and model-based studies looking at effectiveness of contact- and tracing apps for SARS-CoV-2. N/R = not reported, R = reproduction number,  $R_0$  = baseline reproduction number

| Study                         | Country (of first author) | Study type | Sample size / # of simulations | Time horizon             | Population                                | Specific setting(s)                                 | Intervention                                       | Comparison                                     | Outcome(s)                            | Main findings                                                                                                                                                                                                                                                                                                                                                               |
|-------------------------------|---------------------------|------------|--------------------------------|--------------------------|-------------------------------------------|-----------------------------------------------------|----------------------------------------------------|------------------------------------------------|---------------------------------------|-----------------------------------------------------------------------------------------------------------------------------------------------------------------------------------------------------------------------------------------------------------------------------------------------------------------------------------------------------------------------------|
| Bradshaw 2020 (peer reviewed) | Germany                   | Modelling  | 500 or 1000 simulations        | 52 weeks or 10,000 cases | General population                        | -                                                   | Contact tracing app (Bluetooth) with quarantine    | - Manual contact tracing<br>- Current practice | - R<br>- Outbreak control             | - Bidirectional tracing will enable more effective control of COVID-19<br><br>- Switching from forward to bidirectional tracing can reduce R by 0.3 if the tracing time window is sufficiently wide<br><br>- High adoption of bidirectional manual and digital contact tracing is 3x more effective at outbreak control compared to current practice                        |
| Bulchandani 2020 (preprint)   | USA                       | Modelling  | 4000 simulations               | N/R                      | Susceptible population (i.e. no immunity) | -                                                   | Contact tracing app (not specific) with quarantine | -                                              | - R<br>- Outbreak control             | - Outbreak control is possible regardless of proportion of asymptomatic transmission<br><br>- Outbreak control requires a contact tracing app adoption of 75%-95%                                                                                                                                                                                                           |
| Cencetti 2020 (preprint)      | Italy                     | Modelling  | 20 simulations                 | 50 days                  | General population                        | - University Campus<br>- High school<br>- Workplace | Contact tracing app (Bluetooth) with quarantine    | -                                              | - R<br>- Outbreak control             | - Reduction of R and outbreak control is dependent on contact tracing efficiency, isolation efficiency, and $R_0$<br><br>- Outbreak control can be achieved through tracing and isolation, provided that hygiene and social distancing measures limit $R_0$ to 1.5<br><br>- Outbreak control not feasible if contact tracing app adoption is insufficient or if $R_0$ is >2 |
| Chen 2020 (peer reviewed)     | Taiwan                    | Empirical  | 3000 individuals               | 40 days                  | General population (Taiwan)               | -                                                   | SMS warning (GPS) with quarantine &                | Current practice                               | - Respiratory syndrome<br>- Pneumonia | - Contact tracing and SMS feedback resulted in less cases of respiratory syndrome (16.87 vs 19.23 per 1000) and                                                                                                                                                                                                                                                             |

1  
2  
3  
4  
5  
6  
7  
8  
9  
10  
11  
12  
13  
14  
15  
16  
17  
18  
19  
20  
21  
22  
23  
24  
25  
26  
27  
28  
29  
30  
31  
32  
33  
34  
35  
36  
37  
38  
39  
40  
41  
42  
43  
44  
45  
46  
47

|                              |           |           |                                 |                                 |                                |   |                                                                          |                        |                                                                                                                                                                 |                                                                                                                                                                                                                                                                                                                                                                                                                                                                                                                                                                                                                                         |
|------------------------------|-----------|-----------|---------------------------------|---------------------------------|--------------------------------|---|--------------------------------------------------------------------------|------------------------|-----------------------------------------------------------------------------------------------------------------------------------------------------------------|-----------------------------------------------------------------------------------------------------------------------------------------------------------------------------------------------------------------------------------------------------------------------------------------------------------------------------------------------------------------------------------------------------------------------------------------------------------------------------------------------------------------------------------------------------------------------------------------------------------------------------------------|
|                              |           |           |                                 |                                 |                                |   | symptom monitoring                                                       |                        |                                                                                                                                                                 | <p>pneumonia (2.36 vs 3.81 per 1000) compared to the general population</p> <ul style="list-style-type: none"> <li>- Resource requirements for manual contact tracing could be reduced by using contract tracing apps combined with big data analytics</li> </ul>                                                                                                                                                                                                                                                                                                                                                                       |
| Currie 2020 (peer reviewed)  | Australia | Modelling | Not reported                    | 12 months                       | General population (Australia) | - | Contact tracing app (Bluetooth) with quarantine                          | No contact tracing app | <ul style="list-style-type: none"> <li>- Outbreak control</li> <li>- Cumulative incidence SARS-CoV-2</li> </ul>                                                 | <ul style="list-style-type: none"> <li>- Outbreak control by a contact tracing app can be achieved when adoption is sufficient, and is combined with testing and social distancing</li> <li>- Cumulative incidence of SARS-CoV-2 can within 8 months (depending social distancing and testing intensity) be reduced to: <ul style="list-style-type: none"> <li>o 13-24% at an app adoption of 27%</li> <li>o 17-35% at an app adoption of 40%</li> <li>o 36-59% at an app adoption of 61%</li> <li>o 47-76% at an app adoption of 80%</li> </ul> </li> </ul>                                                                            |
| Ferrari 2020 (peer reviewed) | Italy     | Modelling | 5500 simulations (per scenario) | 50 days<br>300 days<br>400 days | General population (Italy)     | - | Contact tracing app (not specified) with quarantine & symptom monitoring | -                      | <ul style="list-style-type: none"> <li>- R</li> <li>- Outbreak control</li> <li>- Cumulative incidence SARS-CoV-2 (symptomatic)</li> <li>- Mortality</li> </ul> | <ul style="list-style-type: none"> <li>- Reduction of R below 1.0 can be achieved when contact tracing apps have sufficient adoption, efficacy of case identification, and compliance to quarantine</li> <li>- Outbreak control can be achieved using contact tracing apps combined with voluntary self-quarantine and efficient case isolation, depending population density and transportation</li> <li>- Outbreak control was achieved with 75% app adoption rate</li> <li>- Cumulative incidence can be suppressed with 25% app adoption rate, but outbreaks will be sustained by districts with high population density</li> </ul> |

|                                                                |                               |         |           |                        |                    |                              |                                                                                       |                                                     |                                                                                        |                                                                                       |                                                                                                                                                                                                                                                                                                                                                                                                                                 |
|----------------------------------------------------------------|-------------------------------|---------|-----------|------------------------|--------------------|------------------------------|---------------------------------------------------------------------------------------|-----------------------------------------------------|----------------------------------------------------------------------------------------|---------------------------------------------------------------------------------------|---------------------------------------------------------------------------------------------------------------------------------------------------------------------------------------------------------------------------------------------------------------------------------------------------------------------------------------------------------------------------------------------------------------------------------|
|                                                                |                               |         |           |                        |                    |                              |                                                                                       |                                                     |                                                                                        |                                                                                       | <ul style="list-style-type: none"> <li>- Mortality was reduced by:                             <ul style="list-style-type: none"> <li>o 10% at 25% app adoption rate</li> <li>o 25% at 50% app adoption rate</li> <li>o 40-60% at 75% app adoption rate</li> </ul> </li> </ul>                                                                                                                                                  |
| 8<br>9<br>10<br>11<br>12<br>13<br>14<br>15                     | Ferretti 2020 (peer reviewed) | China   | Modelling | 40 simulations (pairs) | 12 days<br>20 days | General population (China)   | - Home<br>- Train<br>- Work                                                           | Contact tracing app (Bluetooth) with quarantine     | Manual contact tracing                                                                 | R                                                                                     | <ul style="list-style-type: none"> <li>- Manual contact tracing is not able to stop outbreaks due to delays (~ 3 days), whereas contact tracing apps are able to prevent outbreaks</li> <li>- Reduction of R below 1.0 is feasible using instantaneous (red. without delays) contact tracing apps</li> </ul>                                                                                                                    |
| 16<br>17<br>18<br>19<br>20<br>21<br>22<br>23<br>24<br>25<br>26 | Grimm 2020 (preprint)         | Germany | Modelling | N/R                    | 500 days           | General population (Germany) | - High risk of severe course of infection<br>- Low risk of severe course of infection | Contact tracing app (not specified) with quarantine | - No intervention<br>- Uniform social distancing<br>- Group specific social distancing | - Cumulative incidence SARS-CoV-2<br>- # of days ICU capacity exceeded<br>- Mortality | <ul style="list-style-type: none"> <li>- ICU capacity and mortality can be kept low by using contact tracing apps combined with tailored social distancing and personal protection measures</li> <li>- ICU capacity was not exceeded at any point with a contact tracing app adoption of 20% or more</li> <li>- Mortality was reduced by 85% when a high (80%) adoption rate of the contact tracing app was achieved</li> </ul> |
| 27<br>28<br>29<br>30<br>31<br>32<br>33<br>34<br>35             | Guttal 2020 (preprint)        | N/R     | Modelling | N/R                    | 150-200 days       | General population           | -                                                                                     | Contact tracing app (Bluetooth) with quarantine     | -                                                                                      | Cumulative incidence SARS-CoV-2                                                       | <ul style="list-style-type: none"> <li>- Peak cumulative incidence can be flattened significantly even when a small fraction of cases are identified using contact tracing apps, tested and isolated</li> <li>- Peak cumulative incidence can strongly be reduced even if contact tracing app testing is only performed in the most probable individuals (<math>p &gt; 0.8</math>)</li> </ul>                                   |

1  
2  
3  
4  
5  
6  
7  
8  
9  
10  
11  
12  
13  
14  
15  
16  
17  
18  
19  
20  
21  
22  
23  
24  
25  
26  
27  
28  
29  
30  
31  
32  
33  
34  
35  
36  
37  
38  
39  
40  
41  
42  
43  
44  
45  
46  
47

For peer review only

|                                  |                |           |                                                                    |           |                                                          |                                              |                                                        |                                               |                                          |                                                                                                                                                                                                                                                                                                                                                                                                                                                                                                                                                                                                                                                                                                                                                                             |
|----------------------------------|----------------|-----------|--------------------------------------------------------------------|-----------|----------------------------------------------------------|----------------------------------------------|--------------------------------------------------------|-----------------------------------------------|------------------------------------------|-----------------------------------------------------------------------------------------------------------------------------------------------------------------------------------------------------------------------------------------------------------------------------------------------------------------------------------------------------------------------------------------------------------------------------------------------------------------------------------------------------------------------------------------------------------------------------------------------------------------------------------------------------------------------------------------------------------------------------------------------------------------------------|
| Kendall 2020 (peer reviewed)     | United Kingdom | Empirical | Population-size Isle of Wight<br>Population-size UK (except Wales) | <2 months | General population (Isle of Wight and UK (except Wales)) | -                                            | Contact tracing app (Bluetooth) with social distancing | -                                             | - R<br>- Cumulative incidence SARS-CoV-2 | - Reduction of R from 1.3 to 0.5 was achieved after implementation of a contact tracing app<br><br>- Cumulative incidence of SARS-CoV-2 reduced by 87% in 2-3 weeks after implementation of a contact tracing app                                                                                                                                                                                                                                                                                                                                                                                                                                                                                                                                                           |
| Kretzschmar 2020 (peer reviewed) | Netherlands    | Modelling | 1,000 simulations                                                  | N/R       | General population                                       | - Close contacts<br>- Casual contacts        | Contact tracing app (Bluetooth) with quarantine        | Social distancing without contact tracing app | R                                        | - Contact tracing apps, with short delays and high coverage for testing and tracing, could substantially reduce the R, alleviating more stringent control measures<br><br>- Reduction of the R from 1.2 with social distancing alone to 0.8 (95% CI 0.7–1.0) by adding a contact tracing app with an adoption of 80%<br><br>- Reduction of the R through contact tracing apps is more effective compared to manual contact tracing, with respectively 17.6% and 2.5% reduction of R compared to no contact tracing<br><br>- Reduction in transmission rate (reflective of R) depends on tracing delay <ul style="list-style-type: none"> <li>o 79.9% with 0-day testing delay</li> <li>o 41.8% with 3-day testing delay</li> <li>o 4.9% with 7-day testing delay</li> </ul> |
| Kucharski 2020 (peer reviewed)   | United Kingdom | Modelling | 25,000 simulations                                                 | N/R       | General population (UK)                                  | - Household<br>- Work<br>- School<br>- Other | Contact tracing app (Bluetooth) with quarantine        | -                                             | - R<br>- Outbreak control                | - Combining contact tracing app with quarantine and reduce transmission more than mass testing or self-isolation alone<br><br>- Reduction in transmission rate (reflective of R) was 47% when contact tracing app was used at 53% adoption rate<br><br>- Maintaining an R < 1.0 requires a combination of self-isolation, contact tracing, and physical distancing                                                                                                                                                                                                                                                                                                                                                                                                          |

|                             |         |           |                 |                      |                            |    |                                                                  |                  |                                                                |                                                                                                                                                                                                                                                                                                                                                                                                                                 |                                                                                                                                                |
|-----------------------------|---------|-----------|-----------------|----------------------|----------------------------|----|------------------------------------------------------------------|------------------|----------------------------------------------------------------|---------------------------------------------------------------------------------------------------------------------------------------------------------------------------------------------------------------------------------------------------------------------------------------------------------------------------------------------------------------------------------------------------------------------------------|------------------------------------------------------------------------------------------------------------------------------------------------|
|                             |         |           |                 |                      |                            |    |                                                                  |                  |                                                                |                                                                                                                                                                                                                                                                                                                                                                                                                                 | - Outbreak control in a scenario where incidence is high requires a considerable number of individuals to be quarantined after contact tracing |
| 8                           | 9       | 10        | 11              | 12                   | 13                         | 14 | 15                                                               | 16               | 17                                                             | 18                                                                                                                                                                                                                                                                                                                                                                                                                              | 19                                                                                                                                             |
| Kurita 2020 (peer reviewed) | Japan   | Modelling | N/R             | 5 months             | General population (Japan) | -  | Contact tracing app (Bluetooth) with quarantine                  | -                | R                                                              | - Reduction of $R < 1.3$ using a contact tracing app is not feasible if there are no voluntary restrictions<br>- Reduction of $R < 1.0$ is feasible if contact tracing app adoption is 10% combined with 15% compliance for voluntary restrictions against going out                                                                                                                                                            |                                                                                                                                                |
| 16                          | 17      | 18        | 19              | 20                   | 21                         | 22 | 23                                                               | 24               | 25                                                             | 26                                                                                                                                                                                                                                                                                                                                                                                                                              | 27                                                                                                                                             |
| Nuzzo 2020 (peer reviewed)  | USA     | Modelling | N/R             | 400 days<br>150 days | Susceptible individuals    | -  | Contact tracing app (GPS,WiFi, and/or Bluetooth) with quarantine | Shelter in place | - Cumulative incidence SARS-CoV-2<br>- Mortality               | - Contact tracing apps can mitigate infection spread similar to universal shelter-in-place, but with considerably fewer individuals isolated<br>- Cumulative peak incidence can be reduced by 49% at 20% app adoption rate<br>- Cumulative peak incidence can be reduced by 90% at 50% app adoption rate (similar to 40% compliance to shelter in place)<br>- Mortality can be reduced by 23% at 20% app adoption rate          |                                                                                                                                                |
| 29                          | 30      | 31        | 32              | 33                   | 34                         | 35 | 36                                                               | 37               | 38                                                             | 39                                                                                                                                                                                                                                                                                                                                                                                                                              | 40                                                                                                                                             |
| Pollmann 2020 (preprint)    | Germany | Modelling | 100 simulations | 500 days             | General population         | -  | Contact tracing app (Bluetooth) with quarantine                  | -                | - R<br>- Outbreak control<br>- Cumulative incidence SARS-CoV-2 | - Recursive tracing by contact tracing apps is more efficient than 1-step-tracing<br>- Contact tracing apps alone cannot bring $R$ below 1.0, unless 100% adoption is approached, and app notifications are strictly followed by quarantining and testing<br>- Reducing an $R_0$ of $>3.0$ , in which 40% are asymptomatic SARS-CoV-2 carriers, below 1.0, can only be achieved by a contact tracing app if combined with other |                                                                                                                                                |



1  
2  
3  
4  
5  
6  
7  
8  
9  
10  
11  
12  
13  
14  
15  
16  
17  
18  
19  
20  
21  
22  
23  
24  
25  
26  
27  
28  
29  
30  
31  
32  
33  
34  
35  
36  
37  
38  
39  
40  
41  
42  
43  
44  
45  
46  
47

|                            |            |           |     |                                                   |                                              |                                                                                                                                                    |                                                     |                                                                                                   |                                                                                                  |                                                                                                                                                                                                                                                                                                                                                                                                                                                                                                                                                                                                                                                                                                                 |
|----------------------------|------------|-----------|-----|---------------------------------------------------|----------------------------------------------|----------------------------------------------------------------------------------------------------------------------------------------------------|-----------------------------------------------------|---------------------------------------------------------------------------------------------------|--------------------------------------------------------------------------------------------------|-----------------------------------------------------------------------------------------------------------------------------------------------------------------------------------------------------------------------------------------------------------------------------------------------------------------------------------------------------------------------------------------------------------------------------------------------------------------------------------------------------------------------------------------------------------------------------------------------------------------------------------------------------------------------------------------------------------------|
|                            |            |           |     |                                                   |                                              |                                                                                                                                                    |                                                     |                                                                                                   |                                                                                                  | <p>interventions such as social distancing and/or random testing</p> <ul style="list-style-type: none"> <li>- Reducing R significantly requires a contact tracing app adoption rate of at least 60%</li> <li>- Cumulative incidence is reduced at any percentage of contact tracing app adoption</li> </ul>                                                                                                                                                                                                                                                                                                                                                                                                     |
| Scott 2020 (peer reviewed) | Australia  | Modelling | N/R | 3.5 months                                        | Susceptible population (Victoria, Australia) | Various*                                                                                                                                           | Contact tracing app (Bluetooth) with quarantine     | -                                                                                                 | Cumulative incidence SARS-CoV-2                                                                  | <ul style="list-style-type: none"> <li>- Impact of policy changes on cumulative incidence can take &gt;2 months to become apparent</li> <li>- Opening pubs/bars was identified as the greatest risk for increasing incidence of SARS-CoV-2. This could be mitigated by either of these measures: <ul style="list-style-type: none"> <li>o 30% app adoption rate is achieved</li> <li>o Transmission within venues was reduced by &gt;40% through physical distancing policies</li> <li>o Manual contact tracing was used that enabled &gt;60% of contacts to be traced</li> </ul> </li> <li>- Cumulative incidence is unlikely to be significantly impacted when app adoption rates are low-moderate</li> </ul> |
| Shamil 2020 (preprint)     | Bangladesh | Modelling | N/R | 60 days (Ford County)<br>120 days (New York city) | Susceptible population                       | <ul style="list-style-type: none"> <li>- Healthcare workers</li> <li>- Students</li> <li>- Service holders</li> <li>- Unemployed people</li> </ul> | Contact tracing app (not specified) with quarantine | <ul style="list-style-type: none"> <li>- Lockdown</li> <li>- Extra personal protection</li> </ul> | <ul style="list-style-type: none"> <li>- R</li> <li>- Cumulative incidence SARS-CoV-2</li> </ul> | <ul style="list-style-type: none"> <li>- Reduction of R below 1.0 can be achieved within 3 weeks at 60% app adoption rate</li> <li>- Cumulative incidence approach zero within 3 months when 75% app adoption rate is achieved</li> <li>- Cumulative incidence is reduced by 3.5% when using a contact tracing app compared to not using one</li> </ul>                                                                                                                                                                                                                                                                                                                                                         |

1  
2  
3  
4  
5  
6  
7  
8  
9  
10  
11  
12  
13  
14  
15  
16  
17  
18  
19  
20  
21  
22  
23  
24  
25  
26  
27  
28  
29  
30  
31  
32  
33  
34  
35  
36  
37  
38  
39  
40  
41  
42  
43  
44  
45  
46  
47

|  |  |  |  |  |  |  |  |  |  |  |  |                                                                                                                                                                                                                                                                                                                    |
|--|--|--|--|--|--|--|--|--|--|--|--|--------------------------------------------------------------------------------------------------------------------------------------------------------------------------------------------------------------------------------------------------------------------------------------------------------------------|
|  |  |  |  |  |  |  |  |  |  |  |  | - Cumulative incidence is reduced by 4.6% after 90 days when either: <ul style="list-style-type: none"> <li>○ All doctors, nurses, healthcare workers and 50% of service holders are using a contact tracing app for 2 days</li> <li>○ 75% of the population are using a contact tracing app for 2 days</li> </ul> |
|--|--|--|--|--|--|--|--|--|--|--|--|--------------------------------------------------------------------------------------------------------------------------------------------------------------------------------------------------------------------------------------------------------------------------------------------------------------------|

\* Household, school, work, community, church, professional sports, community sports, beaches, entertainment, cafés / restaurants, pubs / bars, public transport, national parks, public parks, large events, child care, social networks, and aged care

Table 2. Properties of model-based studies

Model-specific characteristics of model-based studies looking at effectiveness of contact- and tracing apps for SARS-CoV-2. Hyphens (-) indicate a continuous range between numbers, semicolons indicate separate distinct values. R = Reproductionnumber, N/A = not applicable, N/R = not reported, ODE = ordinary differential equations, PDE = partial differential equations, HH = household

Table with 13 columns: Study, Model-related properties (Modeltype, Input parameter properties), Contact- and tracing app related properties (Tracing direction, # of sequential generations, Adoption rate app), Disease-related properties (R, Incubation time, Infectious period, Probability of disease transmission), and Modifyable properties (Delay symptom onset and testing, Delay testing and feedback app, Quarantine effectiveness). Rows include studies by Bradshaw 2020, Bulchandani 2020, Cencetti 2020, Currie 2020, Ferrari 2020, Ferretti 2020, and Grimm 2020.

|                                  | Model-related properties       |                                                    | Contact- and tracing app related properties |                             |                                   | Disease-related properties           |                 |                   |                                                             | Modifyable properties           |                                |                                       |
|----------------------------------|--------------------------------|----------------------------------------------------|---------------------------------------------|-----------------------------|-----------------------------------|--------------------------------------|-----------------|-------------------|-------------------------------------------------------------|---------------------------------|--------------------------------|---------------------------------------|
| Study                            | Modeltype                      | Input parameter properties                         | Tracing direction                           | # of sequential generations | Adoption rate app                 | R                                    | Incubation time | Infectious period | Probability of disease transmission                         | Delay symptom onset and testing | Delay testing and feedback app | Quarantine effectiveness              |
| Guttal 2020 (preprint)           | Individual-based network model | Based on exponential distributions                 | Bidirectional                               | >1 generation               | 100%                              | 3.0;4.0                              | N/A             | 20 days           | 0.2%                                                        | N/R                             | N/R                            | 100%                                  |
| Kretzschmar 2020 (peer reviewed) | Branching-process model        | Distributions                                      | Forward                                     | 1 generation                | 20;40;60;80;100%                  | 2.5                                  | 6.4 days        | 10 days           | 2-12%                                                       | 0 days                          | 0 days                         | 0;20;40;60;80;100%                    |
| Kucharski 2020 (peer reviewed)   | Individual-based network model | Distributions                                      | Forward                                     | 1 generation                | 53%                               | 2.6                                  | 5.0 days        | 5 days            | 20% within HH<br>6% outside HH<br>50% less for asymptomatic | 0 days                          | 0 days                         | 90%                                   |
| Kurita, 2020 (peer reviewed)     | ODE compartmental model        | Based on exponential distributions                 | N/R                                         | 1 generation                | 0;10;20;30;40;50;60;70;80;90;100% | 1.5                                  | 6.6 days        | N/R               | N/R                                                         | 2 days                          | 0 days                         | N/R                                   |
| Nuzzo, 2020 (peer reviewed)      | ODE compartmental model        | Based on exponential distributions                 | N/A <sup>4</sup>                            | N/A <sup>4</sup>            | 0;10;20;30;40;50;60;70;80;90%     | 3.02                                 | 5.1 days        | N/R               | Fitted to curve, value not specified                        | N/R                             | N/R                            | 100%                                  |
| Pollmann 2020 (preprint)         | ODE compartmental model        | Based on exponential distributions & distributions | Bidirectional                               | >1 generation               | 60;75;90;100%                     | 2.0-3.0-4.0                          | 4.0;7.4 days    | 10 days           | 7% <sup>5</sup>                                             | 0;2;4;6 days                    | N/R                            | 100%                                  |
| Scott 2020 (peer reviewed)       | Agent-based model              | Distributions                                      | Forward                                     | 1 generation                | 0-50%                             | Fitted to curve, value not specified | 4.6 days        | 8-14 days         | Fitted to curve, value not specified                        | 1 day                           | 1 day                          | 0% in HH<br>80-100% in other settings |
| Shamil 2020 (preprint)           | Agent-based model              | Distributions                                      | Forward                                     | 1 generation                | 60;75%                            | Fitted to curve, value not specified | 6.0 days        | 10 days           | N/R                                                         | 0 days                          | 0 days                         | 100%                                  |

<sup>1</sup> Fraction of infections before symptoms is relevant

<sup>2</sup> Isolation based on positive notification, not a positive test

<sup>3</sup> Changing app coverage covers imperfect isolation

<sup>4</sup> No true tracing, fixed proportion cases will self-isolate

<sup>5</sup> Time-dependent, maximum value reported in table

1  
2  
3  
4  
5  
6  
7  
8  
9  
10  
11  
12  
13  
14  
15  
16  
17  
18  
19  
20  
21  
22  
23  
24  
25  
26  
27  
28  
29  
30  
31  
32  
33  
34  
35  
36  
37  
38  
39  
40  
41  
42  
43  
44  
45  
46  
47

### Table 3. Critical appraisal of empirical studies

Table - Critical appraisal empirical epidemiological studies looking at effectiveness of contact- and tracing apps for SARS-CoV-2

| Study                        | Confounding? | Selection bias: participants? | Selection bias: missing data? | Information bias: intervention misclassification / non-compliance? | Information bias: Misclassification of the outcome? | Other concerns?                              | Overall risk of bias |
|------------------------------|--------------|-------------------------------|-------------------------------|--------------------------------------------------------------------|-----------------------------------------------------|----------------------------------------------|----------------------|
| Chen 2020 (peer reviewed)    | Yes*         | No                            | Unclear                       | No                                                                 | Unclear                                             | None                                         | High                 |
| Kendall 2020 (peer reviewed) | Yes          | No                            | Unclear                       | No                                                                 | No                                                  | Competing interests and funding not reported | High                 |

\* Only adjusted for age

## Table 4. Critical appraisal of model-based studies

Table - Critical appraisal model based studies looking at effectiveness of contact- and tracing apps for SARS-CoV-2

| Study                            | Were empirical distributions used for a varying infectiousness since time of infection? | Were various different scenarios evaluated for important model assumptions and parameter values? | Were models reported transparently? (i.e. no black box) | Other concerns?                              | Overall study validity |
|----------------------------------|-----------------------------------------------------------------------------------------|--------------------------------------------------------------------------------------------------|---------------------------------------------------------|----------------------------------------------|------------------------|
| Bradshaw 2020 (peer reviewed)    | Yes                                                                                     | Yes                                                                                              | Yes                                                     | External funding <sup>1</sup>                | High                   |
| Bulchandani 2020 (preprint)      | No                                                                                      | Yes                                                                                              | Yes                                                     | Competing interests & funding not reported   | High                   |
| Cencetti 2020 (preprint)         | Yes                                                                                     | Yes                                                                                              | Yes                                                     | No                                           | High                   |
| Currie 2020 (peer reviewed)      | Yes                                                                                     | Yes                                                                                              | Yes                                                     | No                                           | High                   |
| Ferrari 2020 (peer reviewed)     | No                                                                                      | Yes                                                                                              | Yes                                                     | Competing interests <sup>2</sup>             | High                   |
| Ferretti 2020 (peer reviewed)    | Yes                                                                                     | Yes                                                                                              | Yes                                                     | No                                           | High                   |
| Grimm 2020 (preprint)            | No                                                                                      | Yes                                                                                              | Yes                                                     | No                                           | High                   |
| Guttal 2020 (preprint)           | Yes                                                                                     | Yes                                                                                              | Yes                                                     | Competing interests and funding not reported | High                   |
| Kretzschmar 2020 (peer reviewed) | Yes                                                                                     | Yes                                                                                              | Yes                                                     | No                                           | High                   |

1  
2  
3  
4  
5  
6  
7  
8  
9  
10  
11  
12  
13  
14  
15  
16  
17  
18  
19  
20  
21  
22  
23  
24  
25  
26  
27  
28  
29  
30  
31  
32  
33  
34  
35  
36  
37  
38  
39  
40  
41  
42  
43  
44  
45  
46  
47

|                                |     |     |         |                                                                       |      |
|--------------------------------|-----|-----|---------|-----------------------------------------------------------------------|------|
| Kucharski 2020 (peer reviewed) | Yes | Yes | Yes     | Funding <sup>3</sup> , though no influence of funder on study results | High |
| Kurita, 2020 (peer reviewed)   | No  | No* | Unclear | Type of model used unclear                                            | Low  |
| Nuzzo, 2020 (peer reviewed)    | No  | No* | Yes     | Potential competing interests <sup>4</sup>                            | Low  |
| Pollmann 2020 (preprint)       | Yes | Yes | Yes     | Competing interests and funding not reported                          | High |
| Scott 2020 (peer reviewed)     | Yes | Yes | Yes     | Funding <sup>5</sup>                                                  | High |
| Shamil 2020 (preprint)         | No  | Yes | Unclear | No                                                                    | Low  |

\* Scenarios were limited only to variation in rate of adoption of the contact- and tracing app and voluntary quarantine

<sup>1</sup> This work was supported by gifts from the Reid Hoffman Foundation and the Open Philanthropy Project (to K.M.E.) and cluster time granted by the COVID-19 HPC consortium (MCB20071 to K.M.E.). E.C.A. was supported by a fellowship from the Open Philanthropy Project. A.L.L. is supported by the Drexel Endowment (NC State University). The funders had no role in the research, writing, or decision to publish.

<sup>2</sup> E.S. works for Bayer, is collaborating to COVID Safe Paths app, by MIT, and advising LEMONADE tracing app, by Nuland. A.S.C. works for Roche Pharma. M.T.F is consultant for Ely Lilly.

<sup>3</sup> Wellcome Trust, UK Engineering and Physical Sciences Research Council, European Commission, Royal Society, Medical Research Council.

<sup>4</sup> Dr Raskar is the founder of a non-profit to facilitate digital contact tracing. The other authors report no potential competing interests.

<sup>5</sup> Funding by the Burnet Institute

1  
2  
3  
4  
5  
6  
7  
8  
9  
10  
11  
12  
13  
14  
15  
16  
17  
18  
19  
20  
21  
22  
23  
24  
25  
26  
27  
28  
29  
30  
31  
32  
33  
34  
35  
36  
37  
38  
39  
40  
41  
42  
43  
44  
45  
46  
47  
48  
49  
50  
51  
52  
53  
54  
55  
56  
57  
58  
59  
60

For peer review only



## Supplementary file 1. Search strategy

### Search strategy

On October 28th 2020 the comprehensive set of studies included in the COAP database (available on <https://ispmbern.github.io/covid-19/living-review/collectingdata.html>) was loaded in Endnote X9.

The dataset consisted of 82,401 references related to research on COVID-19. The following search was performed within this dataset:

(contact OR tracing OR track OR tracking OR warn OR warning) AND  
(smartphone OR app OR smartwatch OR device OR mobile OR smart phone OR bluetooth OR  
wearable OR iphone OR cell phone)

### Background COAP database

The COAP database is a repository provided by Bern University, in which studies related to COVID-19 are incorporated. (available on <https://ispmbern.github.io/covid-19/living-review/collectingdata.html>)

Studies included in this repository are extracted on a daily basis from EMBASE (OVID), MEDLINE (PubMed), BioRxiv, and MedRxiv. References that are not yet available in the repository are added based on the date of publication provided by the aforementioned databases. The date on which the reference is added to the COAP database is included under the heading 'strategydate'.

Search strategies used for the COAP database are updated on a regular basis. An overview of these updates can be found below.

### Initial search: 01.01.2020

#### MEDLINE

("Wuhan coronavirus" [Supplementary Concept] OR "COVID-19" OR "2019 ncov"[tiab] OR ("novel coronavirus"[tiab] OR "new coronavirus"[tiab]) AND (wuhan[tiab] OR 2019[tiab])) OR 2019-nCoV[All Fields] OR (wuhan[tiab] AND coronavirus[tiab]))))

#### EMBASE

ncov OR (wuhan AND corona) OR COVID

#### BioRxiv/MedRxiv

ncov or corona or wuhan or COVID

**Update #1: 26.03.2020**MEDLINE

("Wuhan coronavirus" [Supplementary Concept] OR "COVID-19" OR SARS-CoV-2 OR "2019 nCoV"[tiab] OR (("novel coronavirus"[tiab] OR "new coronavirus"[tiab]) AND (wuhan[tiab] OR 2019[tiab])) OR 2019-nCoV[All Fields] OR (wuhan[tiab] AND coronavirus[tiab]))

EMBASE

(nCoV or 2019-nCoV or ((new or novel or wuhan) adj3 coronavirus) or covid19 or covid-19 or SARS-CoV-2).mp.

BioRxiv/MedRxiv

ncov or corona or wuhan or COVID or SARS-CoV-2

With the kind support of the Public Health & Primary Care Library PHC, and following guidance of the Medical Library Association

**Update #2: 01.04.2020**

From 01.04.2020, we retrieve the currate BioRxiv/MedRxiv dataset [Link](#)

**Update #3: 29.04.2020**MEDLINE

("coronavirus"[MH] OR "coronavirus infections"[MH] OR "coronavirus"[TW] OR "corona virus"[TW] OR "HCoV"[TW] OR "nCov"[TW] OR "covid"[TW] OR "covid19"[TW] OR "Severe Acute Respiratory Syndrome Coronavirus 2"[TW] OR "SARS-CoV2"[TW] OR "SARS-CoV 2"[TW] OR "SARS Coronavirus 2"[TW] OR "MERS-CoV"[TW]) AND (2019/1/1:3000[PDAT])

**Update #4: 01.05.2020**EMBASE

(SARS coronavirus/ or middle east respiratory syndrome/ or severe acute respiratory syndrome/ or (coronavirus\* or corona virus\* or HCoV\* or nCoV\* or covid or covid19 or sars-cov\* or sarscov\* or Sars-coronavirus\* or Severe Acute Respiratory Syndrome Coronavirus\*).mp.) and 20191201:20301231.(dc).

**Update #5: 30.10.2020**EMBASE

(exp SARS-related coronavirus/ or severe acute respiratory syndrome/ or coronavirus disease 2019/ or (coronavir\* or corona virus\* or HCoV\* or nCoV\* or 2019 cov or covid or covid19 or sars-cov\* or sarscov\* or sars-coronavirus\* or Severe Acute Respiratory Syndrome Coronavirus\* or nCoV).mp.) and 20191101:20301231.(dc).

1  
2  
3 MEDLINE

4 ("severe acute respiratory syndrome coronavirus 2"[Supplementary Concept] OR "COVID-19"  
5 [Supplementary Concept] OR "coronavirus" OR "corona virus" OR "HCoV" OR "nCoV" OR "2019  
6 CoV" OR "covid" OR "covid19" OR "Severe Acute Respiratory Syndrome Coronavirus 2" OR  
7 "SARS-CoV2" OR "SARS-CoV 2" OR "SARS Coronavirus 2") AND (2019/11/01:3000/12/31[PDAT])  
8  
9  
10  
11  
12  
13  
14  
15  
16  
17  
18  
19  
20  
21  
22  
23  
24  
25  
26  
27  
28  
29  
30  
31  
32  
33  
34  
35  
36  
37  
38  
39  
40  
41  
42  
43  
44  
45  
46  
47  
48  
49  
50  
51  
52  
53  
54  
55  
56  
57  
58  
59  
60

## Supplementary file 2. Flowchart study selection

Flowchart regarding selection of studies looking at effectiveness of contact- and tracing apps for SARS-CoV-2

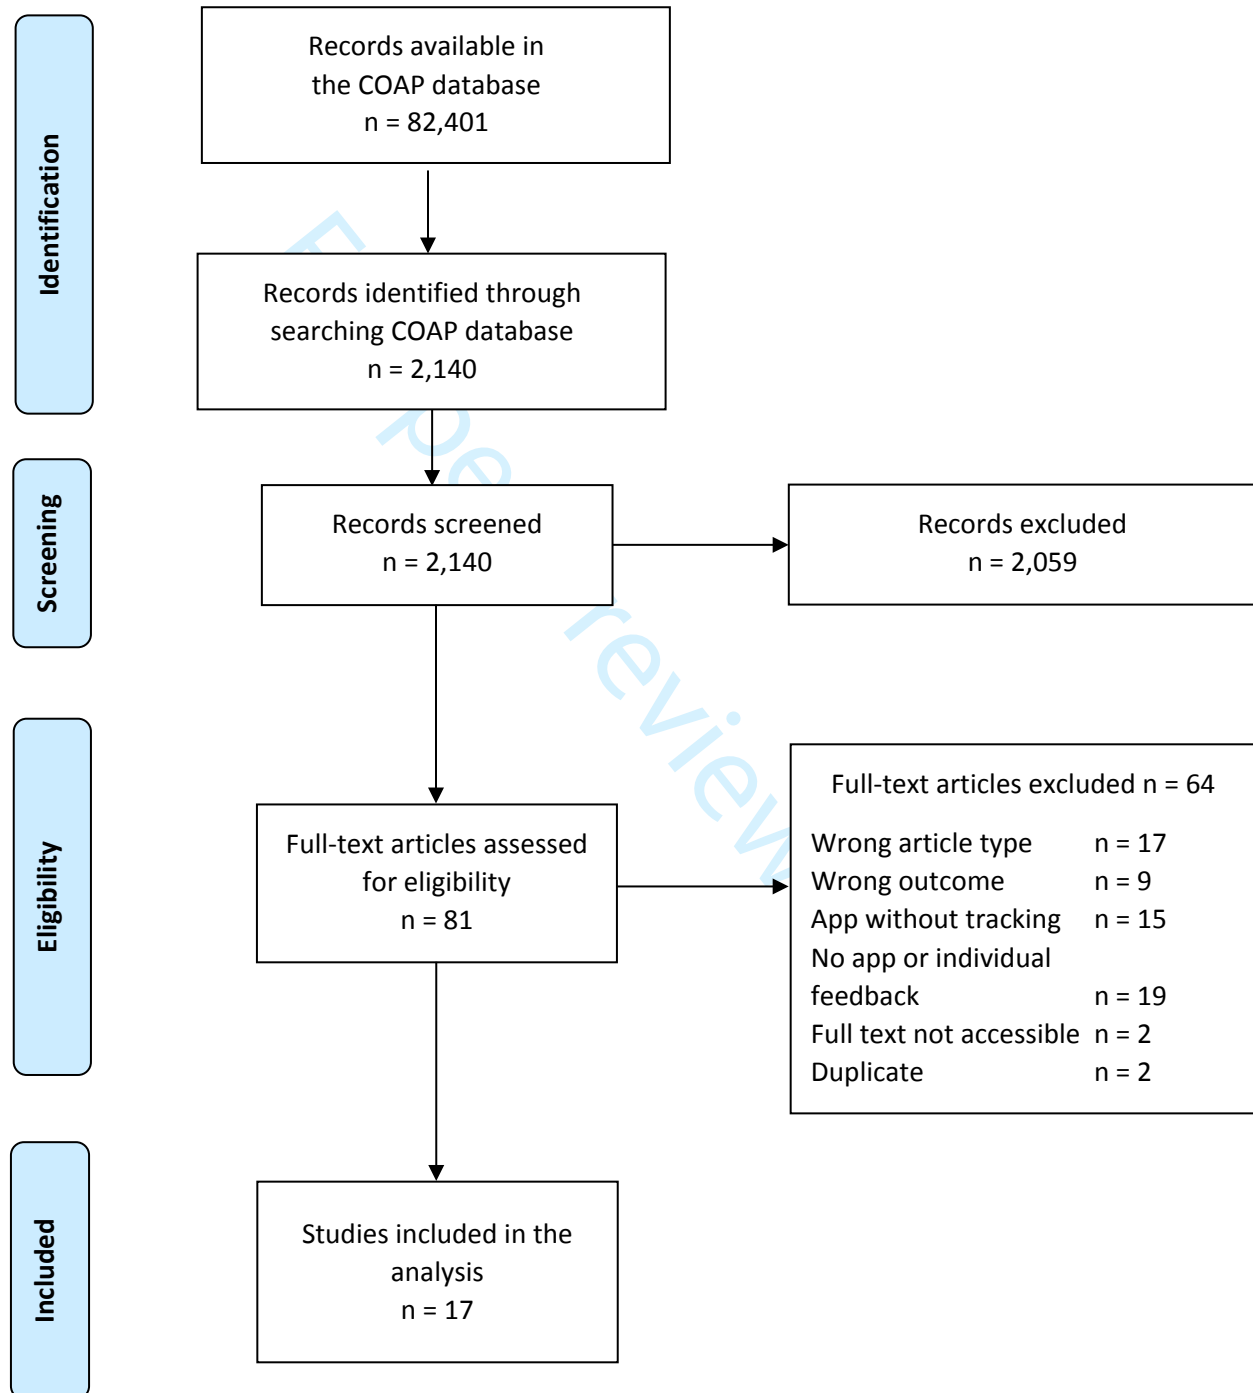

## Supplementary file 3. Excluded studies

Studies not meeting inclusion criteria after full text screening, and excluded from analyses (n=64)

| Reference                  | Reason for exclusion          |
|----------------------------|-------------------------------|
| <b>Aleta 2020</b>          | No app or individual feedback |
| <b>Aleta 2020</b>          | No app or individual feedback |
| <b>Ayres 2020</b>          | Wrong outcome                 |
| <b>Bian 2020</b>           | Wrong article type            |
| <b>Bianconi 2020</b>       | Full text not accessible      |
| <b>Braithwaite 2020</b>    | Wrong article type            |
| <b>Braithwaite 2020</b>    | Duplicate                     |
| <b>Braun 2020</b>          | Full text not accessible      |
| <b>Brooks-Pollock 2020</b> | No app or individual feedback |
| <b>Chan 2020</b>           | Wrong article type            |
| <b>Chen 2020</b>           | No app or individual feedback |
| <b>Di Domenico 2020</b>    | No app or individual feedback |
| <b>Drake 2020</b>          | Wrong article type            |
| <b>Drew 2020</b>           | App without tracking          |
| <b>Fateh-Moghadam 2020</b> | App without tracking          |
| <b>Fenton 2020</b>         | Wrong outcome                 |
| <b>Firth 2020</b>          | No app or individual feedback |
| <b>Gozzi 2020</b>          | App without tracking          |
| <b>Grantz 2020</b>         | Wrong outcome                 |
| <b>Güemes 2020</b>         | App without tracking          |
| <b>Haller 2020</b>         | Wrong article type            |
| <b>Huang 2020</b>          | Wrong outcome                 |
| <b>Hussein 2020</b>        | No app or individual feedback |
| <b>Jian 2020</b>           | Wrong outcome                 |
| <b>Kassaye 2020</b>        | App without tracking          |
| <b>Kendall 2020</b>        | Duplicate                     |
| <b>Khataee 2020</b>        | Wrong article type            |
| <b>Kogan 2020</b>          | Wrong outcome                 |
| <b>Kretzschmar 2020</b>    | Duplicate                     |
| <b>Lambert 2020</b>        | Wrong article type            |
| <b>Leith 2020</b>          | Wrong article type            |
| <b>Liu 2020</b>            | No app or individual feedback |
| <b>Maghdid 2020</b>        | Wrong article type            |
| <b>Marín-García 2020</b>   | Wrong article type            |
| <b>Menni 2020</b>          | App without tracking          |
| <b>Menni 2020</b>          | App without tracking          |

|                          |                               |
|--------------------------|-------------------------------|
| <b>Milenkovic 2020</b>   | No app or individual feedback |
| <b>Mishra 2020</b>       | App without tracking          |
| <b>Morley 2020</b>       | No app or individual feedback |
| <b>Nagarajan 2020</b>    | No app or individual feedback |
| <b>Ni Lochlainn 2020</b> | App without tracking          |
| <b>Pépin 2020</b>        | Wrong outcome                 |
| <b>Petrellis 2020</b>    | Wrong article type            |
| <b>Ranjan 2020</b>       | App without tracking          |
| <b>Ruediger 2020</b>     | No app or individual feedback |
| <b>Salathe 2020</b>      | Wrong outcome                 |
| <b>Sattler 2020</b>      | Wrong article type            |
| <b>Serafino 2020</b>     | App without tracking          |
| <b>Sun 2020</b>          | App without tracking          |
| <b>Sun 2020</b>          | No app or individual feedback |
| <b>Szocska 2020</b>      | No app or individual feedback |
| <b>Unwin 2020</b>        | No app or individual feedback |
| <b>Vannoni 2020</b>      | No app or individual feedback |
| <b>Varsavsky 2020</b>    | No app or individual feedback |
| <b>Vinceti 2020</b>      | App without tracking          |
| <b>Wallentin 2020</b>    | Wrong article type            |
| <b>Whaiduzzaman 2020</b> | Wrong article type            |
| <b>Wilson 2020</b>       | Wrong article type            |
| <b>Wong 2020</b>         | Wrong article type            |
| <b>Yabe 2020</b>         | No app or individual feedback |
| <b>Yap 2020</b>          | Wrong outcome                 |
| <b>Yasaka 2020</b>       | Wrong article type            |
| <b>Zens 2020</b>         | App without tracking          |
| <b>Zhan 2020</b>         | No app or individual feedback |
|                          |                               |

## Supplementary file 4. Method for critical appraisal of empirical studies

### Method used for critical appraisal of empirical epidemiologic studies

|                                                                                                                                                                                                                                                                                                                                     |
|-------------------------------------------------------------------------------------------------------------------------------------------------------------------------------------------------------------------------------------------------------------------------------------------------------------------------------------|
| <b>Confounding</b>                                                                                                                                                                                                                                                                                                                  |
| Have the authors <u>identified</u> all important confounding factors? <b>Yes / No / Unclear</b>                                                                                                                                                                                                                                     |
| Were the identified confounding factors <u>adjusted</u> for in the design and/or analysis? <b>Yes / No / Unclear</b>                                                                                                                                                                                                                |
| <ul style="list-style-type: none"> <li>- Model-based adjustment of confounders</li> <li>- Stratification</li> <li>- Matching</li> <li>- No adjustment required (randomization)</li> </ul>                                                                                                                                           |
| <b>Selection bias</b>                                                                                                                                                                                                                                                                                                               |
| Was patient exposure / intervention status <u>at inclusion</u> likely to result in bias? <b>Yes / No / Unclear</b>                                                                                                                                                                                                                  |
| <ul style="list-style-type: none"> <li>- Non-randomized study</li> <li>- Randomized study with issues regarding allocation concealment or non-random sequencing</li> <li>- Stringent exclusion criteria</li> </ul>                                                                                                                  |
| Was missing data or loss to follow-up <u>during the study</u> likely to result in bias? <b>Yes / No / Unclear</b>                                                                                                                                                                                                                   |
| <ul style="list-style-type: none"> <li>- Missingness likely not completely at random (i.e. not MCAR or % of missingness different between groups)</li> <li>- No methods described for handling missingness (i.e. imputation)</li> <li>- Other methods explored to prevent missingness (i.e. cross checking data sources)</li> </ul> |
| <b>Information bias</b>                                                                                                                                                                                                                                                                                                             |
| Was measurement of exposure / administration of the <u>intervention</u> likely to result in bias? <b>Yes / No / Unclear</b>                                                                                                                                                                                                         |
| <ul style="list-style-type: none"> <li>- Blinding</li> <li>- Standardization</li> <li>- Objective</li> <li>- Non-compliance</li> <li>- Breaking protocol</li> </ul>                                                                                                                                                                 |
| Was measurement of <u>outcome</u> likely to result in bias? <b>Yes / No / Unclear</b>                                                                                                                                                                                                                                               |
| <ul style="list-style-type: none"> <li>- Blinding</li> <li>- Standardization</li> <li>- Objective (note: if this is the case item should be scored 'No')</li> </ul>                                                                                                                                                                 |
| <b>Other concerns? FREE TEXT</b>                                                                                                                                                                                                                                                                                                    |
| Items to consider (but not limited to)                                                                                                                                                                                                                                                                                              |
| <ul style="list-style-type: none"> <li>- Reporting bias</li> <li>- Conflict of interest</li> </ul>                                                                                                                                                                                                                                  |

## Supplementary file 5. Method for critical appraisal of model-based studies

### Method used for critical appraisal of model based studies

**Were empirical distributions used for a varying infectiousness since time of infection?**

**Yes / No / Unclear**

Keywords indicating distributions were used

- Weibull
- Log-normal
- Exponential distribution

**Were various different scenarios evaluated for important model assumptions and parameter values? Yes / No / Unclear**

Keywords indicating uncertainty was taken into account

- Sensitivity analysis
- Scenario analysis

**Were models reported transparently? (i.e. no black box) Yes / No / Unclear**

Key elements indicating that model can be reproduced

- (differential) Equation specified
- Behavior of agents specified
- Graphic representation of model
- All variables and distributions specified

**Other concerns? FREE TEXT**

Items to consider (but not limited to)

- Reporting bias
- Conflict of interest
- Illogical properties of the model not captured by the criteria above



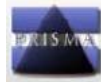

# PRISMA 2009 Checklist

| Section/topic                      | #  | Checklist item                                                                                                                                                                                                                                                                                              | Reported on page # |
|------------------------------------|----|-------------------------------------------------------------------------------------------------------------------------------------------------------------------------------------------------------------------------------------------------------------------------------------------------------------|--------------------|
| <b>TITLE</b>                       |    |                                                                                                                                                                                                                                                                                                             |                    |
| Title                              | 1  | Identify the report as a systematic review, meta-analysis, or both.                                                                                                                                                                                                                                         | 1                  |
| <b>ABSTRACT</b>                    |    |                                                                                                                                                                                                                                                                                                             |                    |
| Structured summary                 | 2  | Provide a structured summary including, as applicable: background; objectives; data sources; study eligibility criteria, participants, and interventions; study appraisal and synthesis methods; results; limitations; conclusions and implications of key findings; systematic review registration number. | 3                  |
| <b>INTRODUCTION</b>                |    |                                                                                                                                                                                                                                                                                                             |                    |
| Rationale                          | 3  | Describe the rationale for the review in the context of what is already known.                                                                                                                                                                                                                              | 4                  |
| Objectives                         | 4  | Provide an explicit statement of questions being addressed with reference to participants, interventions, comparisons, outcomes, and study design (PICOS).                                                                                                                                                  | 4-5                |
| <b>METHODS</b>                     |    |                                                                                                                                                                                                                                                                                                             |                    |
| Protocol and registration          | 5  | Indicate if a review protocol exists, if and where it can be accessed (e.g., Web address), and, if available, provide registration information including registration number. <b>Given the rapid nature of this systematic review, no protocol was registered beforehand</b>                                | -                  |
| Eligibility criteria               | 6  | Specify study characteristics (e.g., PICOS, length of follow-up) and report characteristics (e.g., years considered, language, publication status) used as criteria for eligibility, giving rationale.                                                                                                      | 5                  |
| Information sources                | 7  | Describe all information sources (e.g., databases with dates of coverage, contact with study authors to identify additional studies) in the search and date last searched.                                                                                                                                  | 5, 28              |
| Search                             | 8  | Present full electronic search strategy for at least one database, including any limits used, such that it could be repeated.                                                                                                                                                                               | 6, 28-30           |
| Study selection                    | 9  | State the process for selecting studies (i.e., screening, eligibility, included in systematic review, and, if applicable, included in the meta-analysis).                                                                                                                                                   | 6                  |
| Data collection process            | 10 | Describe method of data extraction from reports (e.g., piloted forms, independently, in duplicate) and any processes for obtaining and confirming data from investigators.                                                                                                                                  | 6-7                |
| Data items                         | 11 | List and define all variables for which data were sought (e.g., PICOS, funding sources) and any assumptions and simplifications made.                                                                                                                                                                       | 6-7                |
| Risk of bias in individual studies | 12 | Describe methods used for assessing risk of bias of individual studies (including specification of whether this was done at the study or outcome level), and how this information is to be used in any data synthesis.                                                                                      | 6, 34, 35          |
| Summary measures                   | 13 | State the principal summary measures (e.g., risk ratio, difference in means).                                                                                                                                                                                                                               | 6-7                |

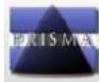

# PRISMA 2009 Checklist

|                      |    |                                                                                                                                                           |   |
|----------------------|----|-----------------------------------------------------------------------------------------------------------------------------------------------------------|---|
| Synthesis of results | 14 | Describe the methods of handling data and combining results of studies, if done, including measures of consistency (e.g., $I^2$ ) for each meta-analysis. | 7 |
|----------------------|----|-----------------------------------------------------------------------------------------------------------------------------------------------------------|---|

Page 1 of 2

| Section/topic                 | #  | Checklist item                                                                                                                                                                                           | Reported on page # |
|-------------------------------|----|----------------------------------------------------------------------------------------------------------------------------------------------------------------------------------------------------------|--------------------|
| Risk of bias across studies   | 15 | Specify any assessment of risk of bias that may affect the cumulative evidence (e.g., publication bias, selective reporting within studies).                                                             | -                  |
| Additional analyses           | 16 | Describe methods of additional analyses (e.g., sensitivity or subgroup analyses, meta-regression), if done, indicating which were pre-specified.                                                         | -                  |
| <b>RESULTS</b>                |    |                                                                                                                                                                                                          |                    |
| Study selection               | 17 | Give numbers of studies screened, assessed for eligibility, and included in the review, with reasons for exclusions at each stage, ideally with a flow diagram.                                          | 7, 31-33           |
| Study characteristics         | 18 | For each study, present characteristics for which data were extracted (e.g., study size, PICOS, follow-up period) and provide the citations.                                                             | 7, 8, 16-24        |
| Risk of bias within studies   | 19 | Present data on risk of bias of each study and, if available, any outcome level assessment (see item 12).                                                                                                | 8, 25-27           |
| Results of individual studies | 20 | For all outcomes considered (benefits or harms), present, for each study: (a) simple summary data for each intervention group (b) effect estimates and confidence intervals, ideally with a forest plot. | 9-12               |
| Synthesis of results          | 21 | Present results of each meta-analysis done, including confidence intervals and measures of consistency. <b>Not applicable, as only qualitative assessment was possible</b>                               | -                  |
| Risk of bias across studies   | 22 | Present results of any assessment of risk of bias across studies (see Item 15).                                                                                                                          | -                  |
| Additional analysis           | 23 | Give results of additional analyses, if done (e.g., sensitivity or subgroup analyses, meta-regression [see Item 16]).                                                                                    | -                  |
| <b>DISCUSSION</b>             |    |                                                                                                                                                                                                          |                    |
| Summary of evidence           | 24 | Summarize the main findings including the strength of evidence for each main outcome; consider their relevance to key groups (e.g., healthcare providers, users, and policy makers).                     | 12                 |
| Limitations                   | 25 | Discuss limitations at study and outcome level (e.g., risk of bias), and at review-level (e.g., incomplete retrieval of identified research, reporting bias).                                            | 12, 13             |
| Conclusions                   | 26 | Provide a general interpretation of the results in the context of other evidence, and implications for future research.                                                                                  | 13                 |
| <b>FUNDING</b>                |    |                                                                                                                                                                                                          |                    |
| Funding                       | 27 | Describe sources of funding for the systematic review and other support (e.g., supply of data); role of funders for the systematic review.                                                               | 2                  |

For peer review only - <http://bmjopen.bmj.com/site/about/guidelines.xhtml>

From: Moher D, Liberati A, Tetzlaff J, Altman DG, The PRISMA Group (2009). Preferred Reporting Items for Systematic Reviews and Meta-Analyses: The PRISMA Statement. PLoS Med 6(7): e1000097.

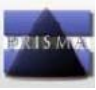

# PRISMA 2009 Checklist

1  
2  
3  
4  
5  
6  
7  
8  
9  
10  
11  
12  
13  
14  
15  
16  
17  
18  
19  
20  
21  
22  
23  
24  
25  
26  
27  
28  
29  
30  
31  
32  
33  
34  
35  
36  
37  
38  
39  
40  
41  
42  
43  
44  
45  
46  
47

doi:10.1371/journal.pmed1000097

For more information, visit: [www.prisma-statement.org](http://www.prisma-statement.org).

Page 2 of 2

For peer review only

# BMJ Open

## Effectiveness of contact tracing apps for SARS-CoV-2: a rapid systematic review

|                                 |                                                                                                                                                                                                                                                                                                                                                                                                                                                                                                                                                                                                                                                                                                                                                                                                                                                                                                                                                                                                                                                                                                                                                                                                                                                                                                                                                                                                                                                                                                                       |
|---------------------------------|-----------------------------------------------------------------------------------------------------------------------------------------------------------------------------------------------------------------------------------------------------------------------------------------------------------------------------------------------------------------------------------------------------------------------------------------------------------------------------------------------------------------------------------------------------------------------------------------------------------------------------------------------------------------------------------------------------------------------------------------------------------------------------------------------------------------------------------------------------------------------------------------------------------------------------------------------------------------------------------------------------------------------------------------------------------------------------------------------------------------------------------------------------------------------------------------------------------------------------------------------------------------------------------------------------------------------------------------------------------------------------------------------------------------------------------------------------------------------------------------------------------------------|
| Journal:                        | <i>BMJ Open</i>                                                                                                                                                                                                                                                                                                                                                                                                                                                                                                                                                                                                                                                                                                                                                                                                                                                                                                                                                                                                                                                                                                                                                                                                                                                                                                                                                                                                                                                                                                       |
| Manuscript ID                   | bmjopen-2021-050519.R1                                                                                                                                                                                                                                                                                                                                                                                                                                                                                                                                                                                                                                                                                                                                                                                                                                                                                                                                                                                                                                                                                                                                                                                                                                                                                                                                                                                                                                                                                                |
| Article Type:                   | Original research                                                                                                                                                                                                                                                                                                                                                                                                                                                                                                                                                                                                                                                                                                                                                                                                                                                                                                                                                                                                                                                                                                                                                                                                                                                                                                                                                                                                                                                                                                     |
| Date Submitted by the Author:   | 27-Apr-2021                                                                                                                                                                                                                                                                                                                                                                                                                                                                                                                                                                                                                                                                                                                                                                                                                                                                                                                                                                                                                                                                                                                                                                                                                                                                                                                                                                                                                                                                                                           |
| Complete List of Authors:       | Jenniskens, Kevin; UMC Utrecht, Department of Epidemiology, Julius Center for Health Sciences and Primary Care; UMC Utrecht, Cochrane Netherlands, Julius Center for Health Sciences and Primary Care, Bootsma, Martin; Utrecht University Faculty of Science, Department of Mathematics, Faculty of Science; UMC Utrecht, Department of Epidemiology, Julius Center for Health Sciences and Primary Care Damen, Johanna; UMC Utrecht, Cochrane Netherlands, Julius Center for Health Sciences and Primary Care; UMC Utrecht, Department of Epidemiology, Julius Center for Health Sciences and Primary Care Oerbekke, Michiel; UMC Utrecht, Cochrane Netherlands, Julius Center for Health Sciences and Primary Care; Knowledge Institute of Medical Specialists<br>Vernooij, Robin; UMC Utrecht, Cochrane Netherlands, Julius Center for Health Sciences and Primary Care; UMC Utrecht, Department of Epidemiology, Julius Center for Health Sciences and Primary Care<br>Spijker, René; UMC Utrecht, Cochrane Netherlands, Julius Center for Health Sciences and Primary Care<br>Moons, Karel; UMC Utrecht, Department of Epidemiology, Julius Center for Health Sciences and Primary Care<br>Kretzschmar, Mirjam; UMC Utrecht, Department of Epidemiology, Julius Center for Health Sciences and Primary Care<br>Hooft, Lotty; UMC Utrecht, Cochrane Netherlands, Julius Center for Health Sciences and Primary Care; UMC Utrecht, Department of Epidemiology, Julius Center for Health Sciences and Primary Care |
| <b>Primary Subject Heading</b>: | Epidemiology                                                                                                                                                                                                                                                                                                                                                                                                                                                                                                                                                                                                                                                                                                                                                                                                                                                                                                                                                                                                                                                                                                                                                                                                                                                                                                                                                                                                                                                                                                          |
| Secondary Subject Heading:      | Global health, Infectious diseases                                                                                                                                                                                                                                                                                                                                                                                                                                                                                                                                                                                                                                                                                                                                                                                                                                                                                                                                                                                                                                                                                                                                                                                                                                                                                                                                                                                                                                                                                    |
| Keywords:                       | COVID-19, Epidemiology < INFECTIOUS DISEASES, MICROBIOLOGY, EPIDEMIOLOGY, STATISTICS & RESEARCH METHODS                                                                                                                                                                                                                                                                                                                                                                                                                                                                                                                                                                                                                                                                                                                                                                                                                                                                                                                                                                                                                                                                                                                                                                                                                                                                                                                                                                                                               |
|                                 |                                                                                                                                                                                                                                                                                                                                                                                                                                                                                                                                                                                                                                                                                                                                                                                                                                                                                                                                                                                                                                                                                                                                                                                                                                                                                                                                                                                                                                                                                                                       |

SCHOLARONE™  
Manuscripts



I, the Submitting Author has the right to grant and does grant on behalf of all authors of the Work (as defined in the below author licence), an exclusive licence and/or a non-exclusive licence for contributions from authors who are: i) UK Crown employees; ii) where BMJ has agreed a CC-BY licence shall apply, and/or iii) in accordance with the terms applicable for US Federal Government officers or employees acting as part of their official duties; on a worldwide, perpetual, irrevocable, royalty-free basis to BMJ Publishing Group Ltd ("BMJ") its licensees and where the relevant Journal is co-owned by BMJ to the co-owners of the Journal, to publish the Work in this journal and any other BMJ products and to exploit all rights, as set out in our [licence](#).

The Submitting Author accepts and understands that any supply made under these terms is made by BMJ to the Submitting Author unless you are acting as an employee on behalf of your employer or a postgraduate student of an affiliated institution which is paying any applicable article publishing charge ("APC") for Open Access articles. Where the Submitting Author wishes to make the Work available on an Open Access basis (and intends to pay the relevant APC), the terms of reuse of such Open Access shall be governed by a Creative Commons licence – details of these licences and which [Creative Commons](#) licence will apply to this Work are set out in our licence referred to above.

Other than as permitted in any relevant BMJ Author's Self Archiving Policies, I confirm this Work has not been accepted for publication elsewhere, is not being considered for publication elsewhere and does not duplicate material already published. I confirm all authors consent to publication of this Work and authorise the granting of this licence.

**Title**

Effectiveness of contact tracing apps for SARS-CoV-2: a rapid systematic review

**Authors**

Kevin Jenniskens, assistant professor<sup>1,2</sup>

Martin C.J. Bootsma, assistant professor<sup>1,3</sup>

Johanna A.A.G. Damen, assistant professor<sup>1,2</sup>

Michiel S. Oerbekke, PhD student<sup>1,2,4</sup>

Robin W.M. Vernooij, assistant professor<sup>1,2</sup>

René Spijker, information specialist<sup>2</sup>

Karel G.M. Moons, full professor<sup>1,2</sup>

Mirjam E.E. Kretzschmar, full professor<sup>1</sup>

Lotty Hoofst, associate professor<sup>1,2</sup>

**Affiliations**

<sup>1</sup> Julius Center for Health Sciences and Primary Care, University Medical Center Utrecht, Utrecht University, Utrecht, The Netherlands

<sup>2</sup> Cochrane Netherlands, University Medical Center Utrecht, Utrecht, The Netherlands

<sup>3</sup> Department of Mathematics, Faculty of Science, Utrecht University, The Netherlands

<sup>4</sup> Knowledge Institute of the Federation of Medical Specialists, Utrecht, The Netherlands

**Corresponding author's email address**

[K.Jenniskens@umcutrecht.nl](mailto:K.Jenniskens@umcutrecht.nl)

### **Funding & role of funding agency**

This research was funded directly (no grant number) by the Dutch Ministry of Health, Welfare and Sport. Researchers involved in this study contributed to the study's conception and execution independently from the funding agency, and as such it was in no way influenced by the funding agency.

### **Copyright statement**

The Corresponding Author has the right to grant on behalf of all authors and does grant on behalf of all authors, an exclusive licence (or non exclusive for government employees) on a worldwide basis to the BMJ Publishing Group Ltd to permit this article (if accepted) to be published in BMJ editions and any other BMJ PGL products and sublicences such use and exploit all subsidiary rights, as set out in our licence.

### **Competing interest statement**

All authors have completed the Unified Competing Interest form (available on request from the corresponding author) and declare: no support from any organisation for the submitted work [or describe if any]; no financial relationships with any organisations that might have an interest in the submitted work in the previous three years, no other relationships or activities that could appear to have influenced the submitted work

### **Transparency declaration**

The lead author affirms that the manuscript is an honest, accurate, and transparent account of the study being reported; that no important aspects of the study have been omitted.

### **Ethical approval**

No ethical approval was required for this study

### **Patient and public involvement statement**

No patients or public were involved in the conception and execution of this study

### **Dissemination statement**

We do not plan to further disseminate the results of this study apart from its publication

### **Data sharing statement**

All data relevant to the study are included in the article or uploaded as supplementary information

## Abstract

**Objective** – To systematically review evidence on effectiveness of contact tracing apps (CTAs) for SARS-CoV-2 on epidemiological and clinical outcomes

**Design** – Rapid systematic review

**Data sources** - EMBASE (OVID), MEDLINE (PubMed), BioRxiv, and MedRxiv were searched up to October 28<sup>th</sup> 2020

**Study selection** – Studies, both empirical and model-based, assessing effect of CTAs for SARS-CoV-2 on reproduction number (R), total number of infections, hospitalization rate, mortality rate, and other epidemiologically and clinically relevant outcomes, were eligible for inclusion.

**Data extraction** – Empirical and model-based studies were critically appraised using separate checklists. Data on type of study (i.e. empirical or model-based), sample size, (simulated) time horizon, study population, CTA type (and associated interventions), comparator, and outcomes assessed, were extracted. The most important findings were extracted and narratively summarized. Specifically for model-based studies, characteristics and values of important model parameters were collected.

**Results** – 2140 studies were identified, of which 17 studies (two empirical, 15 model-based studies) were eligible and included in this review. Both empirical studies were observational (non-randomized) studies and at high risk of bias, most importantly due to risk of confounding. Risk of bias of model-based studies was considered low for 12 of 15 studies. Most studies demonstrated beneficial effects of CTAs on R, total number of infections, and mortality rate. No studies assessed effect on hospitalization. Effect size was dependent on model parameters values used, but in general a beneficial effect was observed at CTA adoption rates of 20% or higher.

**Conclusions** – Contact tracing apps have the potential to be effective in reducing SARS-CoV-2 related epidemiological and clinical outcomes, though effect size depends on other model parameters (e.g. proportion of asymptomatic individuals, or testing delays), and interventions after CTA notification. Methodologically sound comparative empirical studies on effectiveness of CTAs are required to confirm findings from model-based studies.



## Strengths and limitations of this study

- This is the first paper to provide a comprehensive overview and critical appraisal of studies assessing the effectiveness of contact tracing apps for SARS-CoV-2 on clinical and epidemiological outcomes
- Studies were retrieved using a large repository that is developed by a specific search string dedicated to identify studies on SARS-CoV-2 published in various underlying databases
- Critical appraisal was performed by reviewers from diverse backgrounds (i.e. mathematical modelling, epidemiology, medicine, systematic reviews) using predefined customized templates for both empirical and model-based effectiveness studies
- Given the rapid execution and (preprint) publication of studies on effectiveness of contact tracing apps for SARS-CoV-2, this review is unlikely to include the most recent studies that published after the search date
- Due to too much heterogeneity across studies, it was not feasible to provide a pooled meta-analysis estimate of the effectiveness of contact tracing apps for SARS-CoV-2 on the clinical and epidemiological outcomes

## Introduction

The severe acute respiratory syndrome coronavirus 2 (SARS-CoV-2) outbreak has dominated worldwide news and scientific research throughout 2020. Since the outbreak in Wuhan (People's Republic of China) in early December 2019, reducing transmission of SARS-CoV-2 has been a worldwide priority. Digital technology could be applied for efficient contact tracing. Contact tracing applications (CTAs) are able to identify individuals who have recently been in close contact with infected individuals (and may have acquired infection as a consequence). After identification, the contact person can be instructed to go in self-quarantine, preventing further transmission and spread of the virus.

A substantial amount of research on CTAs for SARS-CoV-2 has been performed since the start of the pandemic. Summarizing all evidence, including results from research that has not yet, or is currently undergoing peer-review, is warranted to provide an overview of what is known regarding CTA effectiveness. Research that has not yet undergone peer-review is often published by authors through so-called preprint databases. However, identifying these articles, extracting data, and drawing conclusions can be a challenge, as this requires knowledge on epidemiology, mathematical modelling, systematically appraising evidence, and summarizing that evidence.

A few overviews of evidence on effectiveness of CTAs have been published in recent time. Anglemyer *et al.* provided an overview of study characteristics and quality appraisal of studies on effectiveness of CTAs and other digital contact tracing technologies. (1) However, their data are based on both SARS-CoV-2 infections and other infections (e.g. Ebola), and lack a quantitative effectiveness measure of CTAs on clinically relevant outcomes. Other systematic reviews focused only on user experience in using a CTA for SARS-CoV-2 (2), or only studied manual as opposed to digital contact tracing (3). One systematic review did look into studies on automated and semi-automated CTAs for SARS-CoV-2, but lacked reporting on CTA effectiveness on total number of infections, and hospitalization or mortality rates. (4)

In this rapid systematic review, we aim to evaluate all (empirical and model based) studies addressing effectiveness of CTAs for SARS-CoV-2 on relevant, i.e. epidemiological and

1  
2  
3 clinical, outcomes. We will provide descriptive characteristics, critical appraisal, and a  
4 narrative summary of evidence of included studies.  
5  
6  
7

## 8 **Methods**

### 10 **Search strategy**

11 The *Bern COVID-19 Open Access Project (COAP)* database was used for identification of  
12 relevant research. The COAP database is comprised of research from EMBASE (OVID),  
13 MEDLINE (PubMed), BioRxiv en MedRxiv databases, specifically focused on SARS-CoV-2.  
14 On October 28<sup>th</sup> 2020 the COAP database was searched for scientific literature evaluating  
15 the effectiveness of CTAs for SARS-CoV-2 on epidemiological and clinical outcomes. The  
16 complete search strategy, as well as background information on the COAP database  
17 provided by Bern University, are provided in Supplementary File 1.  
18  
19  
20  
21  
22  
23

### 24 **Eligibility criteria**

25 Empirical (both observational and experimental) and model-based studies evaluating  
26 effectiveness of CTAs for SARS-CoV-2 were eligible for inclusion. Peer-reviewed  
27 publications as well as preprint papers were considered.  
28  
29  
30  
31

32 CTAs were considered when they provided feedback about potential recent exposure to  
33 an infected individual, based on proximity measurements (e.g. Bluetooth or GPS).  
34 Feedback should be provided directly to the individual through a CTA, although other  
35 feedback mechanisms, such as personal devices (e.g. a smartwatch), were also considered.  
36 National emergency warning systems using SMS were also included, provided they used  
37 proximity data to inform individuals.  
38  
39  
40  
41  
42

43 All epidemiologically or clinically relevant outcomes quantifying the impact of CTAs were  
44 considered, which include but are not limited to: the reproduction number (R), total  
45 number of infections, hospitalization rate, and mortality rate related to SARS-CoV-2.  
46 Studies investigating other relevant outcomes, such as prevention of outbreaks or a  
47 second infection wave of SARS-CoV-2, were also included. Studies solely assessing  
48 (determinants affecting) adoption rate of CTAs (i.e. the proportion of citizens using, and  
49 following recommendations provided by, the CTA), temporal change in incidence SARS-  
50 CoV-2, or other non-epidemiological or clinical outcomes were excluded.  
51  
52  
53  
54  
55  
56  
57  
58  
59  
60

## Study selection

Studies identified in the search were first screened independently on title and abstract by two reviewers. Relevant studies were included for full text screening, and further selection of articles was performed by two independent reviewers. Any discrepancies were discussed and resolved. When consensus was not reached, a third reviewer was consulted to provide the final judgement.

## Critical appraisal

Risk of bias was systematically assessed by two researchers using separate checklists for empirical and model-based studies. Discrepancies between researchers were discussed, and a final verdict was provided by a third reviewer if consensus was not reached. Empirical studies were appraised using a formal scoring method based on the Critical Appraisal Skills Programme (CASP) and Cochrane's Effective Practice and Organisation of Care (EPOC) checklists (5, 6) (Supplementary file 2). Risk of bias in model-based research was evaluated by assessing use of empirical input data for the model, number of scenarios analyzed, and transparency of model reporting. (Supplementary file 3)

## Data extraction

Data extraction was performed by one reviewer, and checked by a second reviewer. Descriptive characteristics on type of research, i.e. empirical or model-based, sample size, (simulated) time horizon, study population, CTA properties and intervention, comparator, and epidemiological and clinical outcomes studied, were extracted from all included studies.

Specifically for model-based research, model characteristics (i.e. type of model and distributions used) and values used for important model parameters were collected. Furthermore, CTA specific properties were extracted, such as the method of contact tracing used by these apps. Forward tracing CTAs can only detect the 'offspring', i.e. individuals the index case has infected, of an infected individual. Bidirectional tracing CTAs also detect the 'parents', i.e., the individual that infected the index case of an infected individual. Models were considered to use bidirectional (as opposed to forward) tracing when, after the index case is detected and registered, all contacts within a period of at least the incubation time are identified, such that the parent of the index case could be found.

1  
2  
3 Another CTA specific property included the use of 1-step-tracing or sequential tracing.  
4 When a CTA-identified individual could only notify their contacts after testing positive  
5 themselves, this was considered 1-step-contact tracing. When notified contacts could  
6 subsequently also notify their own contacts, creating a cascade, even before that  
7 individual has shown symptoms or received a positive test result for SARS-CoV-2, this was  
8 considered sequential tracing.  
9  
10  
11

12  
13 The most important findings regarding effectiveness of CTAs for SARS-CoV-2 on  
14 epidemiological and clinical outcomes were extracted, synthesized, and reported  
15 narratively. These outcomes were pooled quantitatively whenever it was feasible to do so.  
16  
17  
18

## 19 20 **Results**

### 21 **Study selection**

22 A total of 2140 potential studies were identified by the search. After selection based on  
23 title and abstract, 2059 articles were excluded. Full texts of the 81 remaining studies were  
24 assessed, after which 17 articles were included for critical appraisal and data extraction  
25 (Supplementary file 4). The 64 excluded studies with their reasons for exclusion are  
26 summarized in Supplementary file 5.  
27  
28  
29  
30  
31  
32

### 33 **Characteristics of included studies**

34 Seventeen primary studies were included, of which two were empirical observational  
35 (non-randomized) studies, and 15 were model-based studies (Table 1).  
36  
37

38 Six of the 17 studies were published preprints, meaning they had not (yet) gone through  
39 the peer review process at the time of data extraction (7-12). Included studies focused  
40 predominantly on the general population, although some analyzed the effectiveness of  
41 CTAs for specific populations such as hospital personnel, or school children (8, 9, 11, 13-  
42 16). Especially in model-based studies, results were often presented graphically.  
43 Consequently, the effectiveness of CTAs on epidemiological and clinical outcomes was  
44 only partly, or not at all, reported in key numerical figures.  
45  
46  
47  
48  
49

50 The model-based studies typically assessed the effectiveness of CTAs by simulating one  
51 or more scenarios based on certain baseline or input values (e.g. proportion of  
52 asymptomatic infections). Table 2 provides an overview of characteristics and the most  
53 important input parameters used in models of the 15 included articles. Nine of the 15  
54 model-based studies evaluated forward tracing CTAs (8, 9, 11, 13-18), four studies  
55  
56  
57  
58  
59

1  
2  
3 analyzed bidirectional tracing CTAs (7, 10, 12, 19), and one used an alternative method  
4 (20). Four studies used a CTA that used sequential tracing (7, 10, 12, 19). All of these also  
5 used bidirectional CTAs, which are more effective than forward tracing CTAs in reducing  
6 R, but require quarantining many more contact persons. This is especially the case when  
7 a significant number of infections come from asymptomatic individuals (i.e. transmission  
8 from a case who does not (yet) have symptoms), who are unaware they have SARS-CoV-  
9 2. (19)

10  
11  
12  
13  
14  
15 The percentage of CTA adoption was varied in almost all studies, allowing for assessment  
16 of the impact of CTAs on epidemiological and clinical outcomes. Average incubation time,  
17 i.e. the mean time between infection and symptom onset of SARS-CoV-2, was estimated  
18 to be 5 to 6 days for SARS-CoV-2 (9, 11-21). The proportion of asymptomatic SARS-CoV-2  
19 infections, used as input parameter in model-based studies, was estimated at 20% to 50%  
20 based on empirical data (8, 9, 16, 18), but could vary between 18% to 86% (9). The baseline  
21 R value chosen in the model-based studies varied between 1.2 and 4.0. (7-10, 12, 14-21)

22  
23  
24  
25  
26  
27 Furthermore, so-called superspreaders (i.e. individuals that infect numerous other  
28 individuals, and consequently have a high individual R) were discussed in context of the  
29 SARS-CoV-2 pandemic. Tracing these superspreaders is key in containing outbreaks.  
30 Hence, it is warranted to use bidirectional CTAs to trace these superspreaders, and advise  
31 them to immediately enter quarantine on identification. (14, 22)

### 32 33 34 35 36 **Critical appraisal**

37 Risk of bias in the two empirical studies was judged to be high (Table 3) (23, 24).  
38 Confounding variables (such as smoking, work status, and income) were insufficiently  
39 taken into account given the explanatory and observational nature of these empirical  
40 studies. It was also unclear how missing (outcome) data were dealt with.

41  
42  
43  
44  
45 Most model-based research was judged to have a low risk of bias (Table 4). Three of the  
46 15 studies had a high risk of bias due to the lack of use of empirical distributions for  
47 variables, the limited number of scenarios analyzed, and insufficient transparency  
48 regarding reporting of the model. (11, 20, 21)

## Synthesis of results

### Evidence from empirical studies

Two empirical comparative observational studies assessed the effectiveness of CTAs compared to a control group that did not use CTAs (Table 1). (23, 24) One study looked at effectiveness of a text warning system used in 627,386 individuals who came in contact with an exposed population, and compared it to the general population of Taiwan who did not use such a warning system. (17) They showed a reduction in incidence of respiratory syndrome from 19.23 to 16.87 per 1000 individuals. They also showed a reduction in pneumonia incidence from 3.81 to 2.36 per 1000 individuals. (17) The second observational study investigated the introduction and adoption of a 'Test and Trace' app by 34,000 individuals living on the Isle of Wight (UK), and compared the estimated value of  $R$  in that region to that in the general UK population. (24) The CTA marked individuals as positive based on self-reporting of symptoms. Individuals that came in contact with an individual marked as positive were provided with social distancing advice. The study found that  $R$  was reduced from 1.3 to 0.5 after implementation of the CTA. Within 2 to 3 weeks after implementation, incidence of SARS-CoV-2 diagnoses declined by around 90%. (24)

### Evidence from model-based studies

#### Effect on $R$

Effectiveness of a 1-step-contact tracing in reducing  $R$  can be approached using the following formula:

$$R_c = R * (1 - p^2 * f)$$

Here,  $R_c$  is the reproduction number when a CTA is used,  $R$  is the reproduction number without the use of a CTA,  $p$  is the proportion of the population using the CTA, and  $f$  is the combination of other factors that affect effectiveness of notification by the CTA. Such factors include, but are not limited to, delay between CTA notification and testing, delay between testing and test result, delay between reception of test result and entry of that result in the CTA, compliance to interventions (e.g. self-quarantine), and the proportion of infections that occur pre- or asymptotically. Note that  $p$  occurs as a quadratic term, which reflects the fact that both infector and infectee have to use the CTA for the transmission to get traced.



1  
2  
3  
4  
5  
6  
7  
8  
9  
10  
11  
12  
13  
14  
15  
16  
17  
18  
19  
20  
21  
22  
23  
24  
25  
26  
27  
28  
29  
30  
31  
32  
33  
34  
35  
36  
37  
38  
39  
40  
41  
42  
43  
44  
45  
46  
47  
48  
49  
50  
51

Nine of the 15 model-based studies assessed the effect of CTAs on reduction of R. (8, 11, 14-16, 18, 19, 21) CTAs were able to control an ongoing outbreak or epidemic through quicker and more efficient feedback of a positive test result, and by notifying close contacts of a positively tested individual. (15, 16, 19) This speed and efficiency were not feasible using traditional manual contact tracing. (16) New outbreaks could be controlled (i.e.  $R_c < 1.0$ ) by CTAs, by combining them with quarantine or self-isolation interventions, provided that hygiene and social distancing measures are maintained. (8, 14, 18, 21) CTAs were able to reduce R by 0.3 more than traditional manual contact tracing, provided that feedback about contact with a positively tested individual is given to all contacts of the index case of the preceding 7 days. (19) Another model-based study demonstrated that a CTA with 20% adoption rate reduces R by 17.6% compared to no contact tracing, whereas traditional manual contact tracing reduced R by 2.5% compared to no contact tracing. (15) This study also demonstrated that a CTA is able to reduce the R further, even when social distancing has already reduced R to 1.2. In this situation, R can be reduced further by 30% to 0.8 when CTA adoption rate is 80%. (15) Another model-based study determined that 60% adoption rate of a CTA could result in an R below 1.0. (11) In one study, adoption rate of 53% resulted in a 47% reduction in R when the complete household of an individual with a positive test result is advised to be quarantined. (14) The last study looking at effect of CTA on R showed that only at 60% adoption rate of the app a significant beneficial effect on R would become apparent. (12) When R is high (e.g. 3.0), and a considerable proportion of individuals is asymptomatic (e.g. 40% of all infections), CTAs need to be combined with other interventions (such as social distancing and random testing) to be able to lower the R below 1.0. (12) Potential for CTAs to reduce R is not only dependent on the adoption rate of the app, but also on (effectiveness of) various other measures that are provided after a positive notification, the delay between positive notification and opportunity for testing, and delay between receiving a positive test result and sharing that result through the CTA. (5, 6, 10) One study found that the percentage of preventable infections by one individual strongly depends on the time delay between CTA notification and the ability to be tested. (15) When there was no delay (i.e. 0 days) 79.9% of infections could be prevented, compared to 41.8% and 4.9% for 3 and 7 days delay respectively.

### 52 Effect on total number of infections

53  
54  
55  
56  
57  
58  
59  
60

Eight of the 15 model-based studies assessed the effect of CTAs on reducing the total number of infections. (8-11, 13, 17, 18, 20) Two studies indicated that the success of CTAs



1  
2  
3 in reducing the total number of infections could only be ensured with a high adoption  
4 rate of that app. (8, 13) Another study showed that with a high CTA adoption rate of 75%,  
5 there would be no more new infections occurring within three months after  
6 implementation. (11) It was found that adequate hygiene and social distancing measures  
7 are needed to enable CTAs to reduce the total number of infections. (8, 9, 17, 18) Especially  
8 in areas where there is low compliance to social distancing, a sufficiently high adoption  
9 rate of a CTA is essential to maintain control of an outbreak. (9)  
10  
11  
12  
13  
14

15  
16 The height of the peak number of new infections can, according to one study, be reduced  
17 by half with a 50% adoption rate of a CTA (18), whereas another study showed that this  
18 could be achieved with an adoption rate as low as 20%. (20) Another study demonstrated  
19 that at 27% CTA adoption rate, a quarter of all new infections can be prevented. (17)  
20 However, according to another study that used a similar adoption rate, the number of  
21 infections would stabilize, but the epidemic would be maintained by core groups in  
22 densely populated areas. (18) There may be a period of time of more than two months  
23 between implementation of interventions (such as CTAs) and the effect of that  
24 implementation on the total number of SARS-CoV-2 infections. (13)  
25  
26  
27  
28  
29  
30

### 31 Effect on number of hospitalizations

32  
33 None of the 15 model-based studies assessed the effect of CTAs on the number of  
34 hospitalizations due to SARS-CoV-2 infection, possibly because the number of  
35 hospitalizations is expected to be proportional to the number of infections, only with a  
36 time-delay. A German study did look into the effect of a CTA on the number of days that  
37 intensive care unit (ICU) capacity was exceeded. (9) They found in their simulations that –  
38 based on the German population, and assuming an ICU capacity of 24.000 beds – a CTA  
39 adoption rate of 20% would prevent exceedance of ICU capacity at any point in time. In  
40 contrast, if no contact tracing (either manual or digital) would be used, ICU capacity would  
41 be exceeded on a quarter of days.  
42  
43  
44  
45  
46  
47

### 48 Effect on mortality rate

49  
50 Three of the 15 model-based studies assessed the effect of CTAs on mortality rate. (9, 18,  
51 20) One study demonstrated that a high adoption rate (80%) of a CTA would result in an  
52 85% reduction in mortality rate, over a period of 500 days (9). Another study found that a  
53 low CTA adoption rate (25%) is associated with a 10% decrease in mortality rate, an  
54 average adoption rate (50%) with 25% decrease, and a high adoption rate (75%) with 40-  
55  
56  
57  
58  
59  
60

1  
2  
3 60% decrease. (18) A third study showed that at 40% adoption rate, during the peak of  
4 an outbreak, a reduction in number of deaths by 97% could be achieved. (20)  
5  
6  
7

## 8 **Discussion**

9  
10 Empirical evidence regarding the effectiveness of using CTAs for detection of SARS-CoV-2  
11 is still limited. Currently, no randomized studies have been performed, and only two  
12 observational comparative studies were identified in this systematic review. Although  
13 some benefits of using CTAs for detection of SARS-CoV-2 were observed, both studies  
14 were deemed to be of low methodological quality. However, the results of these studies  
15 were in accordance with the 15 included, higher quality, model-based studies assessing  
16 effectiveness of CTAs. These studies showed that CTAs can be effective and a valuable  
17 addition to manual contact tracing. CTA use resulted in a lower R, lower total number of  
18 infections, and lower mortality rate. These reductions were already observed at relatively  
19 low adoption rates (e.g. 20%), though higher adoption rates of CTAs resulted in greater  
20 reductions. Shortening delays between CTA notification and diagnostic testing may  
21 increase its effectiveness.  
22  
23  
24  
25  
26  
27  
28  
29

## 30 **Strengths & Limitations**

31  
32 This rapid systematic review assesses key features, quality, and main clinical and  
33 epidemiological outcomes of a set of studies, both empirical and model-based, on  
34 effectiveness of CTAs for SARS-CoV-2. To our knowledge, no such systematic review has  
35 been published, assessing these specific properties. Methodological quality of empirical  
36 studies was assessed using standardized tools. No such tool was available in literature for  
37 model-based studies, and as such a set of key features used in other systematic reviews  
38 on this topic was used. This set was validated by experts in mathematical modelling.  
39  
40  
41  
42  
43

44 To fully appreciate the findings from this systematic review, some considerations should  
45 be taken into account. First, the studies found through the literature search may not be a  
46 comprehensive set. Studies on SARS-CoV-2 are published at a rapid, almost daily, basis  
47 in various online repositories. Although we cannot ensure that all studies on the  
48 effectiveness of CTAs for SARS-CoV-2 have been identified, we believe that the set of  
49 included studies that we have identified is a representative sample.  
50  
51  
52  
53  
54  
55  
56  
57  
58  
59

1  
2  
3 Furthermore, effectiveness of CTAs for SARS-CoV-2 described in model-based studies is  
4 complex. Numerous input variables used in the models interact with one another, and  
5 consequently affect effectiveness of, for example, adoption rate of CTAs on clinical or  
6 epidemiological outcomes. Summarizing these findings into a general effectiveness is  
7 difficult, and will always suffer from simplification of a system of complex interactions.  
8 Though we feel that providing some (conditional) findings from these studies will help  
9 provide some general insight in the impact CTAs can have on clinical and epidemiological  
10 outcomes for SARS-CoV-2.  
11  
12  
13  
14  
15

### 16 17 **Conclusion & implications for further research**

18 Current evidence on the effectiveness of CTAs for SARS-CoV-2 is predominantly based on  
19 modelling studies, which indicate that there is potential in beneficially affecting key clinical  
20 and epidemiological outcomes. High quality empirical evidence, either from experimental  
21 or methodologically sound observational studies, is needed in order to be able to draw  
22 more robust conclusions regarding effectiveness of CTAs for SARS-CoV-2.  
23  
24  
25  
26  
27  
28

### 29 **Contributorship statement**

30 Conception and design: KJ, KGMM, LH

31 Planning: KJ, MCJB, JAAGD, MSO, RWMV, RS, KGMM, MEEK, LH

32 Acquisition of data: RS

33 Conduct: KJ, MCJB, JAAGD, MSO, RWMV, RS, KGMM, MEEK, LH

34 Analysis: KJ, MCJB, KGMM, MEEK, LH

35 interpretation of data: KJ, MCJB, KGMM, MEEK, LH

36 Reporting: KJ, MCJB, JAAGD, MSO, RWMV, RS, KGMM, MEEK, LH  
37  
38  
39  
40  
41  
42  
43  
44  
45  
46  
47  
48  
49  
50  
51  
52  
53  
54  
55  
56  
57  
58  
59  
60

## References

1. Anglemyer A, Moore TH, Parker L, Chambers T, Grady A, Chiu K, et al. Digital contact tracing technologies in epidemics: a rapid review. *Cochrane Database Syst Rev.* 2020;8:CD013699.
2. Davalbhakta S, Advani S, Kumar S, Agarwal V, Bhojar S, Fedirko E, et al. A Systematic Review of Smartphone Applications Available for Corona Virus Disease 2019 (COVID19) and the Assessment of their Quality Using the Mobile Application Rating Scale (MARS). *J Med Syst.* 2020;44(9):164.
3. Nussbaumer-Streit B, Mayr V, Dobrescu AI, Chapman A, Persad E, Klerings I, et al. Quarantine alone or in combination with other public health measures to control COVID-19: a rapid review. *Cochrane Database Syst Rev.* 2020;4:CD013574.
4. Braithwaite I, Callender T, Bullock M, Aldridge RW. Automated and partly automated contact tracing: a systematic review to inform the control of COVID-19. *Lancet Digit Health.* 2020;2(11):e607-e21.
5. CASP Checklist [Internet]. Critical appraisal skills programme. 2018 [cited 15-10-2020]. Available from: [https://casp-uk.net/wp-content/uploads/2018/01/CASP-Cohort-Study-Checklist\\_2018.pdf](https://casp-uk.net/wp-content/uploads/2018/01/CASP-Cohort-Study-Checklist_2018.pdf).
6. EPOC Resources for review authors [Internet]. Cochrane Effective Practice and Organisation of Care (EPOC). 2017 [cited 15-10-2020]. Available from: <https://epoc.cochrane.org/resources/epoc-resources-review-authors>.
7. Bulchandani VB, Shivam S, Moudgalya S, Sondhi SL. Digital Herd Immunity and COVID-19. *medRxiv.* 2020:2020.04.15.20066720.
8. Cencetti G, Santin G, Longa A, Pigani E, Barrat A, Cattuto C, et al. Digital Proximity Tracing in the COVID-19 Pandemic on Empirical Contact Networks. *medRxiv.* 2020:2020.05.29.20115915.
9. Grimm V, Mengel F, Schmidt M. Extensions of the SEIR Model for the Analysis of Tailored Social Distancing and Tracing Approaches to Cope with COVID-19. *medRxiv.* 2020:2020.04.24.20078113.
10. Guttal V, Krishna S, Siddharthan R. Risk assessment via layered mobile contact tracing for epidemiological intervention. *medRxiv.* 2020:2020.04.26.20080648.
11. Shamil MS, Farheen F, Ibtehaz N, Khan IM, Rahman MS. An Agent Based Modeling of COVID-19: Validation, Analysis, and Recommendations. *medRxiv.* 2020:2020.07.05.20146977.
12. Pollmann TR, Pollmann J, Wiesinger C, Haack C, Shtembari L, Turcati A, et al. The impact of digital contact tracing on the SARS-CoV-2 pandemic - a comprehensive modelling study. *medRxiv.* 2020:2020.09.13.20192682.
13. Scott N, Palmer A, Delpont D, Abey Suriya R, Stuart RM, Kerr CC, et al. Modelling the impact of relaxing COVID-19 control measures during a period of low viral transmission. *Med J Aust.* 2021;214(2):79-83.
14. Kucharski AJ, Klepac P, Conlan AJK, Kissler SM, Tang ML, Fry H, et al. Effectiveness of isolation, testing, contact tracing, and physical distancing on reducing transmission of SARS-CoV-2 in different settings: a mathematical modelling study. *Lancet Infect Dis.* 2020;20(10):1151-60.
15. Kretzschmar ME, Rozhnova G, Bootsma MCJ, van Boven M, van de Wijgert J, Bonten MJM. Impact of delays on effectiveness of contact tracing strategies for COVID-19: a modelling study. *Lancet Public Health.* 2020;5(8):e452-e9.
16. Ferretti L, Wymant C, Kendall M, Zhao L, Nurtay A, Abeler-Dörner L, et al. Quantifying SARS-CoV-2 transmission suggests epidemic control with digital contact tracing. *Science.* 2020;368(6491):eabb6936.
17. Currie DJ, Peng CQ, Lyle DM, Jameson BA, Frommer MS. Stemming the flow: how much can the Australian smartphone app help to control COVID-19? *Public Health Res Pract.* 2020;30(2).
18. Ferrari A, Santus E, Cirillo D, Ponce-de-Leon M, Marino N, Ferretti MT, et al. Simulating SARS-CoV-2 epidemics by region-specific variables and modeling contact tracing app containment. *NPJ Digit Med.* 2021;4(1):9.

- 1  
2  
3 19. Bradshaw WJ, Alley EC, Huggins JH, Lloyd AL, Esvelt KM. Bidirectional contact tracing could  
4 dramatically improve COVID-19 control. *Nat Commun.* 2021;12(1):232.  
5  
6 20. Nuzzo A, Tan CO, Raskar R, DeSimone DC, Kapa S, Gupta R. Universal Shelter-in-Place Versus  
7 Advanced Automated Contact Tracing and Targeted Isolation: A Case for 21st-Century Technologies for  
8 SARS-CoV-2 and Future Pandemics. *Mayo Clin Proc.* 2020;95(9):1898-905.  
9  
10 21. Kurita J, Sugawara T, Ohkusa Y. Estimated effectiveness of school closure and voluntary event  
11 cancellation as COVID-19 countermeasures in Japan. *J Infect Chemother.* 2021;27(1):62-4.  
12  
13 22. Endo A, Leclerc QJ, Knight GM, Medley GF, Atkins KE, Funk S, et al. Implication of backward  
14 contact tracing in the presence of overdispersed transmission in COVID-19 outbreak. *medRxiv.*  
15 2020:2020.08.01.20166595.  
16  
17 23. Chen CM, Jyan HW, Chien SC, Jen HH, Hsu CY, Lee PC, et al. Containing COVID-19 Among  
18 627,386 Persons in Contact With the Diamond Princess Cruise Ship Passengers Who Disembarked in  
19 Taiwan: Big Data Analytics. *J Med Internet Res.* 2020;22(5):e19540.  
20  
21 24. Kendall M, Milsom L, Abeler-Dorner L, Wymant C, Ferretti L, Briers M, et al. Epidemiological  
22 changes on the Isle of Wight after the launch of the NHS Test and Trace programme: a preliminary  
23 analysis. *Lancet Digit Health.* 2020;2(12):e658-e66.  
24  
25  
26  
27  
28  
29  
30  
31  
32  
33  
34  
35  
36  
37  
38  
39  
40  
41  
42  
43  
44  
45  
46  
47  
48  
49  
50  
51  
52  
53  
54  
55  
56  
57  
58  
59  
60

### Table 1. Descriptive characteristics of included studies

Characteristics of empirical epidemiological and model-based studies looking at effectiveness of contact- and tracing apps for SARS-CoV-2. N/R = not reported, R = reproduction number,  $R_0$  = baseline reproduction number

| Study                         | Country (of first author) | Study type | Sample size / # of simulations | Time horizon             | Population                                | Specific setting(s)                                 | Intervention                                        | Comparison                                     | Outcome(s)                            | Main findings                                                                                                                                                                                                                                                                                                                                                               |
|-------------------------------|---------------------------|------------|--------------------------------|--------------------------|-------------------------------------------|-----------------------------------------------------|-----------------------------------------------------|------------------------------------------------|---------------------------------------|-----------------------------------------------------------------------------------------------------------------------------------------------------------------------------------------------------------------------------------------------------------------------------------------------------------------------------------------------------------------------------|
| Bradshaw 2020 (peer reviewed) | Germany                   | Modelling  | 500 or 1000 simulations        | 52 weeks or 10,000 cases | General population                        | -                                                   | Contact tracing app (Bluetooth) with quarantine     | - Manual contact tracing<br>- Current practice | - R<br>- Outbreak control             | - Bidirectional tracing will enable more effective control of COVID-19<br><br>- Switching from forward to bidirectional tracing can reduce R by 0.3 if the tracing time window is sufficiently wide<br><br>- High adoption of bidirectional manual and digital contact tracing is 3x more effective at outbreak control compared to current practice                        |
| Bulchandani 2020 (preprint)   | USA                       | Modelling  | 4000 simulations               | N/R                      | Susceptible population (i.e. no immunity) | -                                                   | Contact tracing app (not specified) with quarantine | -                                              | - R<br>- Outbreak control             | - Outbreak control is possible regardless of proportion of asymptomatic transmission<br><br>- Outbreak control requires a contact tracing app adoption of 75%-95%                                                                                                                                                                                                           |
| Cencetti 2020 (preprint)      | Italy                     | Modelling  | 20 simulations                 | 50 days                  | General population                        | - University Campus<br>- High school<br>- Workplace | Contact tracing app (Bluetooth) with quarantine     | -                                              | - R<br>- Outbreak control             | - Reduction of R and outbreak control is dependent on contact tracing efficiency, isolation efficiency, and $R_0$<br><br>- Outbreak control can be achieved through tracing and isolation, provided that hygiene and social distancing measures limit $R_0$ to 1.5<br><br>- Outbreak control not feasible if contact tracing app adoption is insufficient or if $R_0$ is >2 |
| Chen 2020 (peer reviewed)     | Taiwan                    | Empirical  | 3000 individuals               | 40 days                  | General population (Taiwan)               | -                                                   | Public Warning System SMS (GPS) with quarantine &   | Current practice                               | - Respiratory syndrome<br>- Pneumonia | - Contact tracing and SMS feedback resulted in less cases of respiratory syndrome (16.87 vs 19.23 per 1000) and                                                                                                                                                                                                                                                             |

1  
2  
3  
4  
5  
6  
7  
8  
9  
10  
11  
12  
13  
14  
15  
16  
17  
18  
19  
20  
21  
22  
23  
24  
25  
26  
27  
28  
29  
30  
31  
32  
33  
34  
35  
36  
37  
38  
39  
40  
41  
42  
43  
44  
45  
46  
47

For peer review only

|                              |           |           |                                 |                                 |                                |   |                                                                          |                        |                                                                                                                                                                 |                                                                                                                                                                                                                                                                                                                                                                                                                                                                                                                                                                                                                                         |
|------------------------------|-----------|-----------|---------------------------------|---------------------------------|--------------------------------|---|--------------------------------------------------------------------------|------------------------|-----------------------------------------------------------------------------------------------------------------------------------------------------------------|-----------------------------------------------------------------------------------------------------------------------------------------------------------------------------------------------------------------------------------------------------------------------------------------------------------------------------------------------------------------------------------------------------------------------------------------------------------------------------------------------------------------------------------------------------------------------------------------------------------------------------------------|
|                              |           |           |                                 |                                 |                                |   | symptom monitoring                                                       |                        |                                                                                                                                                                 | <p>pneumonia (2.36 vs 3.81 per 1000) compared to the general population</p> <ul style="list-style-type: none"> <li>- Resource requirements for manual contact tracing could be reduced by using contract tracing apps combined with big data analytics</li> </ul>                                                                                                                                                                                                                                                                                                                                                                       |
| Currie 2020 (peer reviewed)  | Australia | Modelling | Not reported                    | 12 months                       | General population (Australia) | - | COVIDSafe contact tracing app (Bluetooth) with quarantine                | No contact tracing app | <ul style="list-style-type: none"> <li>- Outbreak control</li> <li>- Cumulative incidence SARS-CoV-2</li> </ul>                                                 | <ul style="list-style-type: none"> <li>- Outbreak control by a contact tracing app can be achieved when adoption is sufficient, and is combined with testing and social distancing</li> <li>- Cumulative incidence of SARS-CoV-2 can within 8 months (depending social distancing and testing intensity) be reduced to: <ul style="list-style-type: none"> <li>o 13-24% at an app adoption of 27%</li> <li>o 17-35% at an app adoption of 40%</li> <li>o 36-59% at an app adoption of 61%</li> <li>o 47-76% at an app adoption of 80%</li> </ul> </li> </ul>                                                                            |
| Ferrari 2020 (peer reviewed) | Italy     | Modelling | 5500 simulations (per scenario) | 50 days<br>300 days<br>400 days | General population (Italy)     | - | Contact tracing app (not specified) with quarantine & symptom monitoring | -                      | <ul style="list-style-type: none"> <li>- R</li> <li>- Outbreak control</li> <li>- Cumulative incidence SARS-CoV-2 (symptomatic)</li> <li>- Mortality</li> </ul> | <ul style="list-style-type: none"> <li>- Reduction of R below 1.0 can be achieved when contact tracing apps have sufficient adoption, efficacy of case identification, and compliance to quarantine</li> <li>- Outbreak control can be achieved using contact tracing apps combined with voluntary self-quarantine and efficient case isolation, depending population density and transportation</li> <li>- Outbreak control was achieved with 75% app adoption rate</li> <li>- Cumulative incidence can be suppressed with 25% app adoption rate, but outbreaks will be sustained by districts with high population density</li> </ul> |

|                                                                |                               |         |           |                        |                    |                              |                                                                                       |                                                     |                                                                                        |                                                                                       |                                                                                                                                                                                                                                                                                                                                                                                                                                 |
|----------------------------------------------------------------|-------------------------------|---------|-----------|------------------------|--------------------|------------------------------|---------------------------------------------------------------------------------------|-----------------------------------------------------|----------------------------------------------------------------------------------------|---------------------------------------------------------------------------------------|---------------------------------------------------------------------------------------------------------------------------------------------------------------------------------------------------------------------------------------------------------------------------------------------------------------------------------------------------------------------------------------------------------------------------------|
|                                                                |                               |         |           |                        |                    |                              |                                                                                       |                                                     |                                                                                        |                                                                                       | <ul style="list-style-type: none"> <li>- Mortality was reduced by:                             <ul style="list-style-type: none"> <li>o 10% at 25% app adoption rate</li> <li>o 25% at 50% app adoption rate</li> <li>o 40-60% at 75% app adoption rate</li> </ul> </li> </ul>                                                                                                                                                  |
| 8<br>9<br>10<br>11<br>12<br>13<br>14<br>15                     | Ferretti 2020 (peer reviewed) | China   | Modelling | 40 simulations (pairs) | 12 days<br>20 days | General population (China)   | - Home<br>- Train<br>- Work                                                           | Contact tracing app (Bluetooth) with quarantine     | Manual contact tracing                                                                 | R                                                                                     | <ul style="list-style-type: none"> <li>- Manual contact tracing is not able to stop outbreaks due to delays (~ 3 days), whereas contact tracing apps are able to prevent outbreaks</li> <li>- Reduction of R below 1.0 is feasible using instantaneous (red. without delays) contact tracing apps</li> </ul>                                                                                                                    |
| 16<br>17<br>18<br>19<br>20<br>21<br>22<br>23<br>24<br>25<br>26 | Grimm 2020 (preprint)         | Germany | Modelling | N/R                    | 500 days           | General population (Germany) | - High risk of severe course of infection<br>- Low risk of severe course of infection | Contact tracing app (not specified) with quarantine | - No intervention<br>- Uniform social distancing<br>- Group specific social distancing | - Cumulative incidence SARS-CoV-2<br>- # of days ICU capacity exceeded<br>- Mortality | <ul style="list-style-type: none"> <li>- ICU capacity and mortality can be kept low by using contact tracing apps combined with tailored social distancing and personal protection measures</li> <li>- ICU capacity was not exceeded at any point with a contact tracing app adoption of 20% or more</li> <li>- Mortality was reduced by 85% when a high (80%) adoption rate of the contact tracing app was achieved</li> </ul> |
| 27<br>28<br>29<br>30<br>31<br>32<br>33<br>34<br>35             | Guttal 2020 (preprint)        | N/R     | Modelling | N/R                    | 150-200 days       | General population           | -                                                                                     | Contact tracing app (Bluetooth) with quarantine     | -                                                                                      | Cumulative incidence SARS-CoV-2                                                       | <ul style="list-style-type: none"> <li>- Peak cumulative incidence can be flattened significantly even when a small fraction of cases are identified using contact tracing apps, tested and isolated</li> <li>- Peak cumulative incidence can strongly be reduced even if contact tracing app testing is only performed in the most probable individuals (<math>p &gt; 0.8</math>)</li> </ul>                                   |



1  
2  
3  
4  
5  
6  
7  
8  
9  
10  
11  
12  
13  
14  
15  
16  
17  
18  
19  
20  
21  
22  
23  
24  
25  
26  
27  
28  
29  
30  
31  
32  
33  
34  
35  
36  
37  
38  
39  
40  
41  
42  
43  
44  
45  
46  
47

For peer review only

|                                  |                |           |                                                                    |           |                                                          |                                              |                                                                        |                                               |                                          |                                                                                                                                                                                                                                                                                                                                                                                                                                                                                                                                                                                                                                                                                                                                                                             |
|----------------------------------|----------------|-----------|--------------------------------------------------------------------|-----------|----------------------------------------------------------|----------------------------------------------|------------------------------------------------------------------------|-----------------------------------------------|------------------------------------------|-----------------------------------------------------------------------------------------------------------------------------------------------------------------------------------------------------------------------------------------------------------------------------------------------------------------------------------------------------------------------------------------------------------------------------------------------------------------------------------------------------------------------------------------------------------------------------------------------------------------------------------------------------------------------------------------------------------------------------------------------------------------------------|
| Kendall 2020 (peer reviewed)     | United Kingdom | Empirical | Population-size Isle of Wight<br>Population-size UK (except Wales) | <2 months | General population (Isle of Wight and UK (except Wales)) | -                                            | NHS contact tracing app (version 1) (Bluetooth) with social distancing | -                                             | - R<br>- Cumulative incidence SARS-CoV-2 | - Reduction of R from 1.3 to 0.5 was achieved after implementation of a contact tracing app<br><br>- Cumulative incidence of SARS-CoV-2 reduced by 87% in 2-3 weeks after implementation of a contact tracing app                                                                                                                                                                                                                                                                                                                                                                                                                                                                                                                                                           |
| Kretzschmar 2020 (peer reviewed) | Netherlands    | Modelling | 1,000 simulations                                                  | N/R       | General population                                       | - Close contacts<br>- Casual contacts        | Contact tracing app (Bluetooth) with quarantine                        | Social distancing without contact tracing app | R                                        | - Contact tracing apps, with short delays and high coverage for testing and tracing, could substantially reduce the R, alleviating more stringent control measures<br><br>- Reduction of the R from 1.2 with social distancing alone to 0.8 (95% CI 0.7–1.0) by adding a contact tracing app with an adoption of 80%<br><br>- Reduction of the R through contact tracing apps is more effective compared to manual contact tracing, with respectively 17.6% and 2.5% reduction of R compared to no contact tracing<br><br>- Reduction in transmission rate (reflective of R) depends on tracing delay <ul style="list-style-type: none"> <li>o 79.9% with 0-day testing delay</li> <li>o 41.8% with 3-day testing delay</li> <li>o 4.9% with 7-day testing delay</li> </ul> |
| Kucharski 2020 (peer reviewed)   | United Kingdom | Modelling | 25,000 simulations                                                 | N/R       | General population (UK)                                  | - Household<br>- Work<br>- School<br>- Other | Contact tracing app (Bluetooth) with quarantine                        | -                                             | - R<br>- Outbreak control                | - Combining contact tracing app with quarantine and reduce transmission more than mass testing or self-isolation alone<br><br>- Reduction in transmission rate (reflective of R) was 47% when contact tracing app was used at 53% adoption rate<br><br>- Maintaining an R < 1.0 requires a combination of self-isolation, contact tracing, and physical distancing                                                                                                                                                                                                                                                                                                                                                                                                          |

|                             |         |           |                 |                      |                            |    |                                                                  |                  |                                                                |                                                                                                                                                                                                                                                                                                                                                                                                                                 |                                                                                                                                                |
|-----------------------------|---------|-----------|-----------------|----------------------|----------------------------|----|------------------------------------------------------------------|------------------|----------------------------------------------------------------|---------------------------------------------------------------------------------------------------------------------------------------------------------------------------------------------------------------------------------------------------------------------------------------------------------------------------------------------------------------------------------------------------------------------------------|------------------------------------------------------------------------------------------------------------------------------------------------|
|                             |         |           |                 |                      |                            |    |                                                                  |                  |                                                                |                                                                                                                                                                                                                                                                                                                                                                                                                                 | - Outbreak control in a scenario where incidence is high requires a considerable number of individuals to be quarantined after contact tracing |
| 8                           | 9       | 10        | 11              | 12                   | 13                         | 14 | 15                                                               | 16               | 17                                                             | 18                                                                                                                                                                                                                                                                                                                                                                                                                              | 19                                                                                                                                             |
| Kurita 2020 (peer reviewed) | Japan   | Modelling | N/R             | 5 months             | General population (Japan) | -  | COCOA contact tracing app (Bluetooth) with quarantine            | -                | R                                                              | - Reduction of $R < 1.3$ using a contact tracing app is not feasible if there are no voluntary restrictions<br>- Reduction of $R < 1.0$ is feasible if contact tracing app adoption is 10% combined with 15% compliance for voluntary restrictions against going out                                                                                                                                                            |                                                                                                                                                |
| 16                          | 17      | 18        | 19              | 20                   | 21                         | 22 | 23                                                               | 24               | 25                                                             | 26                                                                                                                                                                                                                                                                                                                                                                                                                              | 27                                                                                                                                             |
| Nuzzo 2020 (peer reviewed)  | USA     | Modelling | N/R             | 400 days<br>150 days | Susceptible individuals    | -  | Contact tracing app (GPS,WiFi, and/or Bluetooth) with quarantine | Shelter in place | - Cumulative incidence SARS-CoV-2<br>- Mortality               | - Contact tracing apps can mitigate infection spread similar to universal shelter-in-place, but with considerably fewer individuals isolated<br>- Cumulative peak incidence can be reduced by 49% at 20% app adoption rate<br>- Cumulative peak incidence can be reduced by 90% at 50% app adoption rate (similar to 40% compliance to shelter in place)<br>- Mortality can be reduced by 23% at 20% app adoption rate          |                                                                                                                                                |
| 29                          | 30      | 31        | 32              | 33                   | 34                         | 35 | 36                                                               | 37               | 38                                                             | 39                                                                                                                                                                                                                                                                                                                                                                                                                              | 40                                                                                                                                             |
| Pollmann 2020 (preprint)    | Germany | Modelling | 100 simulations | 500 days             | General population         | -  | Contact tracing app (Bluetooth) with quarantine                  | -                | - R<br>- Outbreak control<br>- Cumulative incidence SARS-CoV-2 | - Recursive tracing by contact tracing apps is more efficient than 1-step-tracing<br>- Contact tracing apps alone cannot bring $R$ below 1.0, unless 100% adoption is approached, and app notifications are strictly followed by quarantining and testing<br>- Reducing an $R_0$ of $>3.0$ , in which 40% are asymptomatic SARS-CoV-2 carriers, below 1.0, can only be achieved by a contact tracing app if combined with other |                                                                                                                                                |

1  
2  
3  
4  
5  
6  
7  
8  
9  
10  
11  
12  
13  
14  
15  
16  
17  
18  
19  
20  
21  
22  
23  
24  
25  
26  
27  
28  
29  
30  
31  
32  
33  
34  
35  
36  
37  
38  
39  
40  
41  
42  
43  
44  
45  
46  
47

|                            |            |           |     |                                                   |                                              |                                                                                                                                                    |                                                           |                                                                                                   |                                                                                                  |                                                                                                                                                                                                                                                                                                                                                                                                                                                                                                                                                                                                                                                                                                                 |
|----------------------------|------------|-----------|-----|---------------------------------------------------|----------------------------------------------|----------------------------------------------------------------------------------------------------------------------------------------------------|-----------------------------------------------------------|---------------------------------------------------------------------------------------------------|--------------------------------------------------------------------------------------------------|-----------------------------------------------------------------------------------------------------------------------------------------------------------------------------------------------------------------------------------------------------------------------------------------------------------------------------------------------------------------------------------------------------------------------------------------------------------------------------------------------------------------------------------------------------------------------------------------------------------------------------------------------------------------------------------------------------------------|
|                            |            |           |     |                                                   |                                              |                                                                                                                                                    |                                                           |                                                                                                   |                                                                                                  | <p>interventions such as social distancing and/or random testing</p> <ul style="list-style-type: none"> <li>- Reducing R significantly requires a contact tracing app adoption rate of at least 60%</li> <li>- Cumulative incidence is reduced at any percentage of contact tracing app adoption</li> </ul>                                                                                                                                                                                                                                                                                                                                                                                                     |
| Scott 2020 (peer reviewed) | Australia  | Modelling | N/R | 3.5 months                                        | Susceptible population (Victoria, Australia) | Various*                                                                                                                                           | COVIDSafe contact tracing app (Bluetooth) with quarantine | -                                                                                                 | Cumulative incidence SARS-CoV-2                                                                  | <ul style="list-style-type: none"> <li>- Impact of policy changes on cumulative incidence can take &gt;2 months to become apparent</li> <li>- Opening pubs/bars was identified as the greatest risk for increasing incidence of SARS-CoV-2. This could be mitigated by either of these measures: <ul style="list-style-type: none"> <li>o 30% app adoption rate is achieved</li> <li>o Transmission within venues was reduced by &gt;40% through physical distancing policies</li> <li>o Manual contact tracing was used that enabled &gt;60% of contacts to be traced</li> </ul> </li> <li>- Cumulative incidence is unlikely to be significantly impacted when app adoption rates are low-moderate</li> </ul> |
| Shamil 2020 (preprint)     | Bangladesh | Modelling | N/R | 60 days (Ford County)<br>120 days (New York city) | Susceptible population                       | <ul style="list-style-type: none"> <li>- Healthcare workers</li> <li>- Students</li> <li>- Service holders</li> <li>- Unemployed people</li> </ul> | Contact tracing app (not specified) with quarantine       | <ul style="list-style-type: none"> <li>- Lockdown</li> <li>- Extra personal protection</li> </ul> | <ul style="list-style-type: none"> <li>- R</li> <li>- Cumulative incidence SARS-CoV-2</li> </ul> | <ul style="list-style-type: none"> <li>- Reduction of R below 1.0 can be achieved within 3 weeks at 60% app adoption rate</li> <li>- Cumulative incidence approach zero within 3 months when 75% app adoption rate is achieved</li> <li>- Cumulative incidence is reduced by 3.5% when using a contact tracing app compared to not using one</li> </ul>                                                                                                                                                                                                                                                                                                                                                         |



Table 2. Properties of model-based studies

Model-specific characteristics of model-based studies looking at effectiveness of contact- and tracing apps for SARS-CoV-2. Hyphens (-) indicate a continuous range between numbers, semicolons indicate separate distinct values. R = Reproductionnumber, N/A = not applicable, N/R = not reported, ODE = ordinary differential equations, PDE = partial differential equations, HH = household

Table with 13 columns: Study, Model-related properties (Modeltype, Input parameter properties), Contact- and tracing app related properties (Tracing direction, # of sequential generations, Adoption rate app), Disease-related properties (R, Incubation time, Infectious period, Probability of disease transmission), and Modifyable properties (Delay symptom onset and testing, Delay testing and feedback app, Quarantine effectiveness). Rows include studies by Bradshaw 2020, Bulchandani 2020, Cencetti 2020, Currie 2020, Ferrari 2020, Ferretti 2020, and Grimm 2020.

|                                  | Model-related properties       |                                                    | Contact- and tracing app related properties |                             |                                   | Disease-related properties           |                 |                   |                                                             | Modifyable properties           |                                |                                       |
|----------------------------------|--------------------------------|----------------------------------------------------|---------------------------------------------|-----------------------------|-----------------------------------|--------------------------------------|-----------------|-------------------|-------------------------------------------------------------|---------------------------------|--------------------------------|---------------------------------------|
| Study                            | Modeltype                      | Input parameter properties                         | Tracing direction                           | # of sequential generations | Adoption rate app                 | R                                    | Incubation time | Infectious period | Probability of disease transmission                         | Delay symptom onset and testing | Delay testing and feedback app | Quarantine effectiveness              |
| Guttal 2020 (preprint)           | Individual-based network model | Based on exponential distributions                 | Bidirectional                               | >1 generation               | 100%                              | 3.0;4.0                              | N/A             | 20 days           | 0.2%                                                        | N/R                             | N/R                            | 100%                                  |
| Kretzschmar 2020 (peer reviewed) | Branching-process model        | Distributions                                      | Forward                                     | 1 generation                | 20;40;60;80;100%                  | 2.5                                  | 6.4 days        | 10 days           | 2-12%                                                       | 0 days                          | 0 days                         | 0;20;40;60;80;100%                    |
| Kucharski 2020 (peer reviewed)   | Individual-based network model | Distributions                                      | Forward                                     | 1 generation                | 53%                               | 2.6                                  | 5.0 days        | 5 days            | 20% within HH<br>6% outside HH<br>50% less for asymptomatic | 0 days                          | 0 days                         | 90%                                   |
| Kurita, 2020 (peer reviewed)     | ODE compartmental model        | Based on exponential distributions                 | N/R                                         | 1 generation                | 0;10;20;30;40;50;60;70;80;90;100% | 1.5                                  | 6.6 days        | N/R               | N/R                                                         | 2 days                          | 0 days                         | N/R                                   |
| Nuzzo, 2020 (peer reviewed)      | ODE compartmental model        | Based on exponential distributions                 | N/A <sup>4</sup>                            | N/A <sup>4</sup>            | 0;10;20;30;40;50;60;70;80;90%     | 3.02                                 | 5.1 days        | N/R               | Fitted to curve, value not specified                        | N/R                             | N/R                            | 100%                                  |
| Pollmann 2020 (preprint)         | ODE compartmental model        | Based on exponential distributions & distributions | Bidirectional                               | >1 generation               | 60;75;90;100%                     | 2.0-3.0-4.0                          | 4.0;7.4 days    | 10 days           | 7% <sup>5</sup>                                             | 0;2;4;6 days                    | N/R                            | 100%                                  |
| Scott 2020 (peer reviewed)       | Agent-based model              | Distributions                                      | Forward                                     | 1 generation                | 0-50%                             | Fitted to curve, value not specified | 4.6 days        | 8-14 days         | Fitted to curve, value not specified                        | 1 day                           | 1 day                          | 0% in HH<br>80-100% in other settings |
| Shamil 2020 (preprint)           | Agent-based model              | Distributions                                      | Forward                                     | 1 generation                | 60;75%                            | Fitted to curve, value not specified | 6.0 days        | 10 days           | N/R                                                         | 0 days                          | 0 days                         | 100%                                  |

<sup>1</sup> Fraction of infections before symptoms is relevant

<sup>2</sup> Isolation based on positive notification, not a positive test

<sup>3</sup> Changing app coverage covers imperfect isolation

<sup>4</sup> No true tracing, fixed proportion cases will self-isolate

<sup>5</sup> Time-dependent, maximum value reported in table

1  
2  
3  
4  
5  
6  
7  
8  
9  
10  
11  
12  
13  
14  
15  
16  
17  
18  
19  
20  
21  
22  
23  
24  
25  
26  
27  
28  
29  
30  
31  
32  
33  
34  
35  
36  
37  
38  
39  
40  
41  
42  
43  
44  
45  
46  
47

### Table 3. Critical appraisal of empirical studies

Table - Critical appraisal empirical epidemiological studies looking at effectiveness of contact- and tracing apps for SARS-CoV-2

| Study                        | Confounding? | Selection bias: participants? | Selection bias: missing data? | Information bias: intervention misclassification / non-compliance? | Information bias: Misclassification of the outcome? | Other concerns?                              | Overall risk of bias |
|------------------------------|--------------|-------------------------------|-------------------------------|--------------------------------------------------------------------|-----------------------------------------------------|----------------------------------------------|----------------------|
| Chen 2020 (peer reviewed)    | Yes*         | No                            | Unclear                       | No                                                                 | Unclear                                             | None                                         | High                 |
| Kendall 2020 (peer reviewed) | Yes          | No                            | Unclear                       | No                                                                 | No                                                  | Competing interests and funding not reported | High                 |

\* Only adjusted for age

## Table 4. Critical appraisal of model-based studies

Table - Critical appraisal model based studies looking at effectiveness of contact- and tracing apps for SARS-CoV-2

| Study                         | Were empirical distributions used for a varying infectiousness since time of infection? | Were various different scenarios evaluated for important model assumptions and parameter values? | Were models reported transparently? (i.e. no black box) | Other concerns?                              | Overall study validity |
|-------------------------------|-----------------------------------------------------------------------------------------|--------------------------------------------------------------------------------------------------|---------------------------------------------------------|----------------------------------------------|------------------------|
| Bradshaw 2020 (peer reviewed) | Yes                                                                                     | Yes                                                                                              | Yes                                                     | External funding <sup>1</sup>                | High                   |
| Bulchandani 2020 (preprint)   | No                                                                                      | Yes                                                                                              | Yes                                                     | Competing interests & funding not reported   | High                   |
| Cencetti 2020 (preprint)      | Yes                                                                                     | Yes                                                                                              | Yes                                                     | No                                           | High                   |
| Currie 2020 (peer reviewed)   | Yes                                                                                     | Yes                                                                                              | Yes                                                     | No                                           | High                   |
| Ferrari 2020 (peer reviewed)  | No                                                                                      | Yes                                                                                              | Yes                                                     | Competing interests <sup>2</sup>             | High                   |
| Ferretti 2020 (peer reviewed) | Yes                                                                                     | Yes                                                                                              | Yes                                                     | No                                           | High                   |
| Grimm 2020 (preprint)         | No                                                                                      | Yes                                                                                              | Yes                                                     | No                                           | High                   |
| Guttal 2020 (preprint)        | Yes                                                                                     | Yes                                                                                              | Yes                                                     | Competing interests and funding not reported | High                   |



1  
2  
3  
4  
5  
6  
7  
8  
9  
10  
11  
12  
13  
14  
15  
16  
17  
18  
19  
20  
21  
22  
23  
24  
25  
26  
27  
28  
29  
30  
31  
32  
33  
34  
35  
36  
37  
38  
39  
40  
41  
42  
43  
44  
45  
46  
47

|                                  |     |     |         |                                                                       |      |
|----------------------------------|-----|-----|---------|-----------------------------------------------------------------------|------|
| Kretzschmar 2020 (peer reviewed) | Yes | Yes | Yes     | No                                                                    | High |
| Kucharski 2020 (peer reviewed)   | Yes | Yes | Yes     | Funding <sup>3</sup> , though no influence of funder on study results | High |
| Kurita, 2020 (peer reviewed)     | No  | No* | Unclear | Type of model used unclear                                            | Low  |
| Nuzzo, 2020 (peer reviewed)      | No  | No* | Yes     | Potential competing interests <sup>4</sup>                            | Low  |
| Pollmann 2020 (preprint)         | Yes | Yes | Yes     | Competing interests and funding not reported                          | High |
| Scott 2020 (peer reviewed)       | Yes | Yes | Yes     | Funding <sup>5</sup>                                                  | High |
| Shamil 2020 (preprint)           | No  | Yes | Unclear | No                                                                    | Low  |

\*Scenarios were limited only to variation in rate of adoption of the contact- and tracing app and voluntary quarantine

<sup>1</sup> This work was supported by gifts from the Reid Hoffman Foundation and the Open Philanthropy Project (to K.M.E.) and cluster time granted by the COVID-19 HPC consortium (MCB20071 to K.M.E.). E.C.A. was supported by a fellowship from the Open Philanthropy Project. A.L.L. is supported by the Drexel Endowment (NC State University). The funders had no role in the research, writing, or decision to publish.

<sup>2</sup> E.S. works for Bayer, is collaborating to COVID Safe Paths app, by MIT, and advising LEMONADE tracing app, by Nuland. A.S.C. works for Roche Pharma. M.T.F is consultant for Ely Lilly.

<sup>3</sup> Wellcome Trust, UK Engineering and Physical Sciences Research Council, European Commission, Royal Society, Medical Research Council.

<sup>4</sup> Dr Raskar is the founder of a non-profit to facilitate digital contact tracing. The other authors report no potential competing interests.

<sup>5</sup> Funding by the Burnet Institute

1  
2  
3  
4  
5  
6  
7  
8  
9  
10  
11  
12  
13  
14  
15  
16  
17  
18  
19  
20  
21  
22  
23  
24  
25  
26  
27  
28  
29  
30  
31  
32  
33  
34  
35  
36  
37  
38  
39  
40  
41  
42  
43  
44  
45  
46  
47  
48  
49  
50  
51  
52  
53  
54  
55  
56  
57  
58  
59  
60

For peer review only

## Supplementary file 1. Search strategy

### Search strategy

On October 28th 2020 the comprehensive set of studies included in the COAP database (available on <https://ispmbern.github.io/covid-19/living-review/collectingdata.html>) was loaded in Endnote X9.

The dataset consisted of 82,401 references related to research on COVID-19. The following search was performed within this dataset:

(contact OR tracing OR track OR tracking OR warn OR warning) AND  
(smartphone OR app OR smartwatch OR device OR mobile OR smart phone OR bluetooth  
OR wearable OR iphone OR cell phone)

### Background COAP database

The COAP database is a repository provided by Bern University, in which studies related to COVID-19 are incorporated. (available on <https://ispmbern.github.io/covid-19/living-review/collectingdata.html>)

Studies included in this repository are extracted on a daily basis from EMBASE (OVID), MEDLINE (PubMed), BioRxiv, and MedRxiv. References that are not yet available in the repository are added based on the date of publication provided by the aforementioned databases. The date on which the reference is added to the COAP database is included under the heading 'strategydate'.

Search strategies used for the COAP database are updated on a regular basis. An overview of these updates can be found below.

### Initial search: 01.01.2020

#### MEDLINE

("Wuhan coronavirus" [Supplementary Concept] OR "COVID-19" OR "2019 ncov"[tiab] OR ("novel coronavirus"[tiab] OR "new coronavirus"[tiab]) AND (wuhan[tiab] OR 2019[tiab])) OR 2019-nCoV[All Fields] OR (wuhan[tiab] AND coronavirus[tiab]))))

#### EMBASE

ncov OR (wuhan AND corona) OR COVID

#### BioRxiv/MedRxiv

ncov or corona or wuhan or COVID

**Update #1: 26.03.2020**MEDLINE

("Wuhan coronavirus" [Supplementary Concept] OR "COVID-19" OR SARS-CoV-2 OR "2019 nCoV"[tiab] OR (("novel coronavirus"[tiab] OR "new coronavirus"[tiab])) AND (wuhan[tiab] OR 2019[tiab])) OR 2019-nCoV[All Fields] OR (wuhan[tiab] AND coronavirus[tiab]))

EMBASE

(nCoV or 2019-nCoV or ((new or novel or wuhan) adj3 coronavirus) or covid19 or covid-19 or SARS-CoV-2).mp.

BioRxiv/MedRxiv

ncov or corona or wuhan or COVID or SARS-CoV-2

With the kind support of the Public Health & Primary Care Library PHC, and following guidance of the Medical Library Association

**Update #2: 01.04.2020**

From 01.04.2020, we retrieve the currate BioRxiv/MedRxiv dataset [Link](#)

**Update #3: 29.04.2020**MEDLINE

("coronavirus"[MH] OR "coronavirus infections"[MH] OR "coronavirus"[TW] OR "corona virus"[TW] OR "HCoV"[TW] OR "nCov"[TW] OR "covid"[TW] OR "covid19"[TW] OR "Severe Acute Respiratory Syndrome Coronavirus 2"[TW] OR "SARS-CoV2"[TW] OR "SARS-CoV 2"[TW] OR "SARS Coronavirus 2"[TW] OR "MERS-CoV"[TW]) AND (2019/1/1:3000[PDAT])

**Update #4: 01.05.2020**EMBASE

(SARS coronavirus/ or middle east respiratory syndrome/ or severe acute respiratory syndrome/ or (coronavirus\* or corona virus\* or HCoV\* or nCoV\* or covid or covid19 or sars-cov\* or sarscov\* or Sars-coronavirus\* or Severe Acute Respiratory Syndrome Coronavirus\*).mp.) and 20191201:20301231.(dc).

**Update #5: 30.10.2020**EMBASE

(exp SARS-related coronavirus/ or severe acute respiratory syndrome/ or coronavirus disease 2019/ or (coronavir\* or corona virus\* or HCoV\* or nCoV\* or 2019 cov or covid or covid19 or sars-cov\* or sarscov\* or sars-coronavirus\* or Severe Acute Respiratory Syndrome Coronavirus\* or nCoV).mp.) and 20191101:20301231.(dc).

1  
2  
3 MEDLINE

4 ("severe acute respiratory syndrome coronavirus 2"[Supplementary Concept] OR "COVID-19"  
5 [Supplementary Concept] OR "coronavirus" OR "corona virus" OR "HCoV" OR "nCoV" OR  
6 "2019 CoV" OR "covid" OR "covid19" OR "Severe Acute Respiratory Syndrome Coronavirus 2"  
7 OR "SARS-CoV2" OR "SARS-CoV 2" OR "SARS Coronavirus 2") AND  
8 (2019/11/01:3000/12/31[PDAT])  
9  
10  
11  
12  
13  
14  
15  
16  
17  
18  
19  
20  
21  
22  
23  
24  
25  
26  
27  
28  
29  
30  
31  
32  
33  
34  
35  
36  
37  
38  
39  
40  
41  
42  
43  
44  
45  
46  
47  
48  
49  
50  
51  
52  
53  
54  
55  
56  
57  
58  
59  
60

For peer review only

## Supplementary file 2. Method for critical appraisal of empirical studies

### Method used for critical appraisal of empirical epidemiologic studies

|                                                                                                                                                                                                                                                                                                                                     |
|-------------------------------------------------------------------------------------------------------------------------------------------------------------------------------------------------------------------------------------------------------------------------------------------------------------------------------------|
| <b>Confounding</b>                                                                                                                                                                                                                                                                                                                  |
| Have the authors <u>identified</u> all important confounding factors? <b>Yes / No / Unclear</b>                                                                                                                                                                                                                                     |
| Were the identified confounding factors <u>adjusted</u> for in the design and/or analysis? <b>Yes / No / Unclear</b>                                                                                                                                                                                                                |
| <ul style="list-style-type: none"> <li>- Model-based adjustment of confounders</li> <li>- Stratification</li> <li>- Matching</li> <li>- No adjustment required (randomization)</li> </ul>                                                                                                                                           |
| <b>Selection bias</b>                                                                                                                                                                                                                                                                                                               |
| Was patient exposure / intervention status <u>at inclusion</u> likely to result in bias? <b>Yes / No / Unclear</b>                                                                                                                                                                                                                  |
| <ul style="list-style-type: none"> <li>- Non-randomized study</li> <li>- Randomized study with issues regarding allocation concealment or non-random sequencing</li> <li>- Stringent exclusion criteria</li> </ul>                                                                                                                  |
| Was missing data or loss to follow-up <u>during the study</u> likely to result in bias? <b>Yes / No / Unclear</b>                                                                                                                                                                                                                   |
| <ul style="list-style-type: none"> <li>- Missingness likely not completely at random (i.e. not MCAR or % of missingness different between groups)</li> <li>- No methods described for handling missingness (i.e. imputation)</li> <li>- Other methods explored to prevent missingness (i.e. cross checking data sources)</li> </ul> |
| <b>Information bias</b>                                                                                                                                                                                                                                                                                                             |
| Was measurement of exposure / administration of the <u>intervention</u> likely to result in bias? <b>Yes / No / Unclear</b>                                                                                                                                                                                                         |
| <ul style="list-style-type: none"> <li>- Blinding</li> <li>- Standardization</li> <li>- Objective</li> <li>- Non-compliance</li> <li>- Breaking protocol</li> </ul>                                                                                                                                                                 |
| Was measurement of <u>outcome</u> likely to result in bias? <b>Yes / No / Unclear</b>                                                                                                                                                                                                                                               |
| <ul style="list-style-type: none"> <li>- Blinding</li> <li>- Standardization</li> <li>- Objective (note: if this is the case item should be scored 'No')</li> </ul>                                                                                                                                                                 |
| <b>Other concerns? FREE TEXT</b>                                                                                                                                                                                                                                                                                                    |
| Items to consider (but not limited to)                                                                                                                                                                                                                                                                                              |
| <ul style="list-style-type: none"> <li>- Reporting bias</li> <li>- Conflict of interest</li> </ul>                                                                                                                                                                                                                                  |

## Supplementary file 3. Method for critical appraisal of model-based studies

### Method used for critical appraisal of model based studies

**Were empirical distributions used for a varying infectiousness since time of infection?**

**Yes / No / Unclear**

Keywords indicating distributions were used

- Weibull
- Log-normal
- Exponential distribution

**Were various different scenarios evaluated for important model assumptions and parameter values? Yes / No / Unclear**

Keywords indicating uncertainty was taken into account

- Sensitivity analysis
- Scenario analysis

**Were models reported transparently? (i.e. no black box) Yes / No / Unclear**

Key elements indicating that model can be reproduced

- (differential) Equation specified
- Behavior of agents specified
- Graphic representation of model
- All variables and distributions specified

**Other concerns? FREE TEXT**

Items to consider (but not limited to)

- Reporting bias
- Conflict of interest
- Illogical properties of the model not captured by the criteria above

## Supplementary file 4. Flowchart study selection

Flowchart regarding selection of studies looking at effectiveness of contact- and tracing apps for SARS-CoV-2

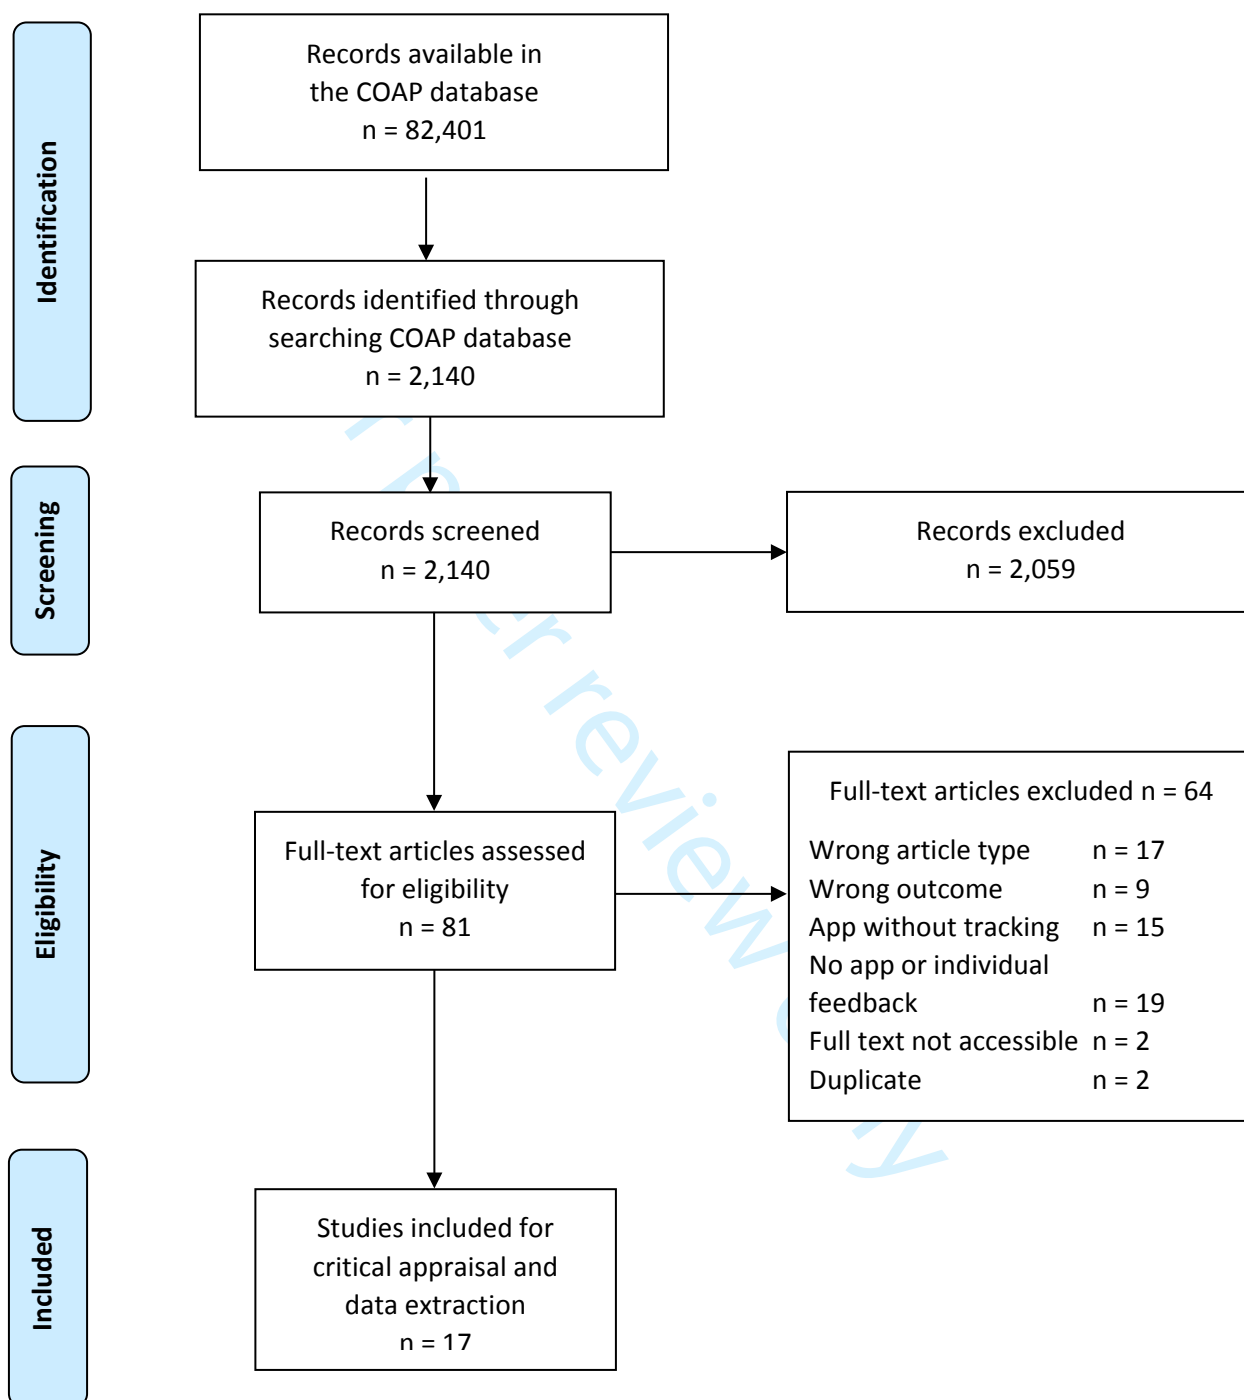



## Supplementary file 5. Excluded studies

Studies not meeting inclusion criteria after full text screening, and excluded from analyses (n=64)

| Reference                  | Reason for exclusion          |
|----------------------------|-------------------------------|
| <b>Aleta 2020</b>          | No app or individual feedback |
| <b>Aleta 2020</b>          | No app or individual feedback |
| <b>Ayres 2020</b>          | Wrong outcome                 |
| <b>Bian 2020</b>           | Wrong article type            |
| <b>Bianconi 2020</b>       | Full text not accessible      |
| <b>Braithwaite 2020</b>    | Wrong article type            |
| <b>Braithwaite 2020</b>    | Duplicate                     |
| <b>Braun 2020</b>          | Full text not accessible      |
| <b>Brooks-Pollock 2020</b> | No app or individual feedback |
| <b>Chan 2020</b>           | Wrong article type            |
| <b>Chen 2020</b>           | No app or individual feedback |
| <b>Di Domenico 2020</b>    | No app or individual feedback |
| <b>Drake 2020</b>          | Wrong article type            |
| <b>Drew 2020</b>           | App without tracking          |
| <b>Fateh-Moghadam 2020</b> | App without tracking          |
| <b>Fenton 2020</b>         | Wrong outcome                 |
| <b>Firth 2020</b>          | No app or individual feedback |
| <b>Gozzi 2020</b>          | App without tracking          |
| <b>Grantz 2020</b>         | Wrong outcome                 |
| <b>Güemes 2020</b>         | App without tracking          |
| <b>Haller 2020</b>         | Wrong article type            |
| <b>Huang 2020</b>          | Wrong outcome                 |
| <b>Hussein 2020</b>        | No app or individual feedback |
| <b>Jian 2020</b>           | Wrong outcome                 |
| <b>Kassaye 2020</b>        | App without tracking          |
| <b>Kendall 2020</b>        | Duplicate                     |
| <b>Khataee 2020</b>        | Wrong article type            |
| <b>Kogan 2020</b>          | Wrong outcome                 |
| <b>Kretzschmar 2020</b>    | Duplicate                     |
| <b>Lambert 2020</b>        | Wrong article type            |
| <b>Leith 2020</b>          | Wrong article type            |
| <b>Liu 2020</b>            | No app or individual feedback |
| <b>Maghdid 2020</b>        | Wrong article type            |
| <b>Marín-García 2020</b>   | Wrong article type            |
| <b>Menni 2020</b>          | App without tracking          |
| <b>Menni 2020</b>          | App without tracking          |
| <b>Milenkovic 2020</b>     | No app or individual feedback |
| <b>Mishra 2020</b>         | App without tracking          |
| <b>Morley 2020</b>         | No app or individual feedback |

|                          |                               |
|--------------------------|-------------------------------|
| <b>Nagarajan 2020</b>    | No app or individual feedback |
| <b>Ni Lochlainn 2020</b> | App without tracking          |
| <b>Pépin 2020</b>        | Wrong outcome                 |
| <b>Petrellis 2020</b>    | Wrong article type            |
| <b>Ranjan 2020</b>       | App without tracking          |
| <b>Ruediger 2020</b>     | No app or individual feedback |
| <b>Salathe 2020</b>      | Wrong outcome                 |
| <b>Sattler 2020</b>      | Wrong article type            |
| <b>Serafino 2020</b>     | App without tracking          |
| <b>Sun 2020</b>          | App without tracking          |
| <b>Sun 2020</b>          | No app or individual feedback |
| <b>Szocska 2020</b>      | No app or individual feedback |
| <b>Unwin 2020</b>        | No app or individual feedback |
| <b>Vannoni 2020</b>      | No app or individual feedback |
| <b>Varsavsky 2020</b>    | No app or individual feedback |
| <b>Vinceti 2020</b>      | App without tracking          |
| <b>Wallentin 2020</b>    | Wrong article type            |
| <b>Whaiduzzaman 2020</b> | Wrong article type            |
| <b>Wilson 2020</b>       | Wrong article type            |
| <b>Wong 2020</b>         | Wrong article type            |
| <b>Yabe 2020</b>         | No app or individual feedback |
| <b>Yap 2020</b>          | Wrong outcome                 |
| <b>Yasaka 2020</b>       | Wrong article type            |
| <b>Zens 2020</b>         | App without tracking          |
| <b>Zhan 2020</b>         | No app or individual feedback |
|                          |                               |

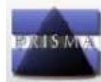

# PRISMA 2009 Checklist

| Section/topic                      | #  | Checklist item                                                                                                                                                                                                                                                                                              | Reported on page #            |
|------------------------------------|----|-------------------------------------------------------------------------------------------------------------------------------------------------------------------------------------------------------------------------------------------------------------------------------------------------------------|-------------------------------|
| <b>TITLE</b>                       |    |                                                                                                                                                                                                                                                                                                             |                               |
| Title                              | 1  | Identify the report as a systematic review, meta-analysis, or both.                                                                                                                                                                                                                                         | 1                             |
| <b>ABSTRACT</b>                    |    |                                                                                                                                                                                                                                                                                                             |                               |
| Structured summary                 | 2  | Provide a structured summary including, as applicable: background; objectives; data sources; study eligibility criteria, participants, and interventions; study appraisal and synthesis methods; results; limitations; conclusions and implications of key findings; systematic review registration number. | 3                             |
| <b>INTRODUCTION</b>                |    |                                                                                                                                                                                                                                                                                                             |                               |
| Rationale                          | 3  | Describe the rationale for the review in the context of what is already known.                                                                                                                                                                                                                              | 5                             |
| Objectives                         | 4  | Provide an explicit statement of questions being addressed with reference to participants, interventions, comparisons, outcomes, and study design (PICOS).                                                                                                                                                  | 5-6                           |
| <b>METHODS</b>                     |    |                                                                                                                                                                                                                                                                                                             |                               |
| Protocol and registration          | 5  | Indicate if a review protocol exists, if and where it can be accessed (e.g., Web address), and, if available, provide registration information including registration number. <b>Given the rapid nature of this systematic review, no protocol was registered beforehand</b>                                | -                             |
| Eligibility criteria               | 6  | Specify study characteristics (e.g., PICOS, length of follow-up) and report characteristics (e.g., years considered, language, publication status) used as criteria for eligibility, giving rationale.                                                                                                      | 6                             |
| Information sources                | 7  | Describe all information sources (e.g., databases with dates of coverage, contact with study authors to identify additional studies) in the search and date last searched.                                                                                                                                  | 6, 29                         |
| Search                             | 8  | Present full electronic search strategy for at least one database, including any limits used, such that it could be repeated.                                                                                                                                                                               | 7<br>Suppl. File<br>page 1-3  |
| Study selection                    | 9  | State the process for selecting studies (i.e., screening, eligibility, included in systematic review, and, if applicable, included in the meta-analysis).                                                                                                                                                   | 7                             |
| Data collection process            | 10 | Describe method of data extraction from reports (e.g., piloted forms, independently, in duplicate) and any processes for obtaining and confirming data from investigators.                                                                                                                                  | 7-8                           |
| Data items                         | 11 | List and define all variables for which data were sought (e.g., PICOS, funding sources) and any assumptions and simplifications made.                                                                                                                                                                       | 7-9                           |
| Risk of bias in individual studies | 12 | Describe methods used for assessing risk of bias of individual studies (including specification of whether this was done at the study or outcome level), and how this information is to be used in any data synthesis.                                                                                      | 7<br>Suppl. File<br>page 7, 8 |

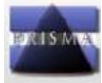

# PRISMA 2009 Checklist

|                      |    |                                                                                                                                                           |     |
|----------------------|----|-----------------------------------------------------------------------------------------------------------------------------------------------------------|-----|
| Summary measures     | 13 | State the principal summary measures (e.g., risk ratio, difference in means).                                                                             | 7-8 |
| Synthesis of results | 14 | Describe the methods of handling data and combining results of studies, if done, including measures of consistency (e.g., $I^2$ ) for each meta-analysis. | 8   |

Page 1 of 2

| Section/topic                 | #  | Checklist item                                                                                                                                                                                           | Reported on page #        |
|-------------------------------|----|----------------------------------------------------------------------------------------------------------------------------------------------------------------------------------------------------------|---------------------------|
| Risk of bias across studies   | 15 | Specify any assessment of risk of bias that may affect the cumulative evidence (e.g., publication bias, selective reporting within studies).                                                             | -                         |
| Additional analyses           | 16 | Describe methods of additional analyses (e.g., sensitivity or subgroup analyses, meta-regression), if done, indicating which were pre-specified.                                                         | -                         |
| <b>RESULTS</b>                |    |                                                                                                                                                                                                          |                           |
| Study selection               | 17 | Give numbers of studies screened, assessed for eligibility, and included in the review, with reasons for exclusions at each stage, ideally with a flow diagram.                                          | 8<br>Suppl. File page 4-6 |
| Study characteristics         | 18 | For each study, present characteristics for which data were extracted (e.g., study size, PICOS, follow-up period) and provide the citations.                                                             | 8, 9,<br>17-25            |
| Risk of bias within studies   | 19 | Present data on risk of bias of each study and, if available, any outcome level assessment (see item 12).                                                                                                | 9, 26-28                  |
| Results of individual studies | 20 | For all outcomes considered (benefits or harms), present, for each study: (a) simple summary data for each intervention group (b) effect estimates and confidence intervals, ideally with a forest plot. | 10-13                     |
| Synthesis of results          | 21 | Present results of each meta-analysis done, including confidence intervals and measures of consistency. <b>Not applicable, as only qualitative assessment was possible</b>                               | -                         |
| Risk of bias across studies   | 22 | Present results of any assessment of risk of bias across studies (see Item 15).                                                                                                                          | -                         |
| Additional analysis           | 23 | Give results of additional analyses, if done (e.g., sensitivity or subgroup analyses, meta-regression [see Item 16]).                                                                                    | -                         |
| <b>DISCUSSION</b>             |    |                                                                                                                                                                                                          |                           |
| Summary of evidence           | 24 | Summarize the main findings including the strength of evidence for each main outcome; consider their relevance to key groups (e.g., healthcare providers, users, and policy makers).                     | 13                        |
| Limitations                   | 25 | Discuss limitations at study and outcome level (e.g., risk of bias), and at review-level (e.g., incomplete retrieval of identified research, reporting bias).                                            | 13, 14                    |
| Conclusions                   | 26 | Provide a general interpretation of the results in the context of other evidence, and implications for future research.                                                                                  | 14                        |
| <b>FUNDING</b>                |    |                                                                                                                                                                                                          |                           |



# PRISMA 2009 Checklist

1  
2  
3  
4  
5  
6  
7  
8  
9  
10  
11  
12  
13  
14  
15  
16  
17  
18  
19  
20  
21  
22  
23  
24  
25  
26  
27  
28  
29  
30  
31  
32  
33  
34  
35  
36  
37  
38  
39  
40  
41  
42  
43  
44  
45  
46  
47

|         |    |                                                                                                                                            |   |
|---------|----|--------------------------------------------------------------------------------------------------------------------------------------------|---|
| Funding | 27 | Describe sources of funding for the systematic review and other support (e.g., supply of data); role of funders for the systematic review. | 2 |
|---------|----|--------------------------------------------------------------------------------------------------------------------------------------------|---|

*From:* Moher D, Liberati A, Tetzlaff J, Altman DG, The PRISMA Group (2009). Preferred Reporting Items for Systematic Reviews and Meta-Analyses: The PRISMA Statement. PLoS Med 6(7): e1000097. doi:10.1371/journal.pmed1000097

For more information, visit: [www.prisma-statement.org](http://www.prisma-statement.org).

For peer review only
