# Supplementary material for: Effectiveness of contact tracing apps for SARS-CoV-2: a rapid systematic review
Source: PubMed Central journal article supplement — BMJ Open. 2021 Jul 12;11(7):e050519. doi: 10.1136/bmjopen-2021-050519 (PMC8277487; doi:10.1136/bmjopen-2021-050519), 2021-07-12
Supplement: bmjopen-2021-050519supp001.pdf [file bmjopen-2021-050519supp001.pdf]

## Supplementary file 1. Search strategy

### Search strategy

On October 28th 2020 the comprehensive set of studies included in the COAP database (available on <https://ispmbern.github.io/covid-19/living-review/collectingdata.html>) was loaded in Endnote X9.

The dataset consisted of 82,401 references related to research on COVID-19. The following search was performed within this dataset:

(contact OR tracing OR track OR tracking OR warn OR warning) AND  
(smartphone OR app OR smartwatch OR device OR mobile OR smart phone OR bluetooth  
OR wearable OR iphone OR cell phone)

### Background COAP database

The COAP database is a repository provided by Bern University, in which studies related to COVID-19 are incorporated. (available on <https://ispmbern.github.io/covid-19/living-review/collectingdata.html>)

Studies included in this repository are extracted on a daily basis from EMBASE (OVID), MEDLINE (PubMed), BioRxiv, and MedRxiv. References that are not yet available in the repository are added based on the date of publication provided by the aforementioned databases. The date on which the reference is added to the COAP database is included under the heading 'strategydate'.

Search strategies used for the COAP database are updated on a regular basis. An overview of these updates can be found below.

### Initial search: 01.01.2020

#### MEDLINE

("Wuhan coronavirus" [Supplementary Concept] OR "COVID-19" OR "2019 ncov"[tiab] OR (("novel coronavirus"[tiab] OR "new coronavirus"[tiab]) AND (wuhan[tiab] OR 2019[tiab])) OR 2019-nCoV[All Fields] OR (wuhan[tiab] AND coronavirus[tiab]))))

#### EMBASE

ncov OR (wuhan AND corona) OR COVID

#### BioRxiv/MedRxiv

ncov or corona or wuhan or COVID

**Update #1: 26.03.2020**MEDLINE

("Wuhan coronavirus" [Supplementary Concept] OR "COVID-19" OR SARS-CoV-2 OR "2019 nCoV"[tiab] OR (("novel coronavirus"[tiab] OR "new coronavirus"[tiab]) AND (wuhan[tiab] OR 2019[tiab])) OR 2019-nCoV[All Fields] OR (wuhan[tiab] AND coronavirus[tiab]))

EMBASE

(nCoV or 2019-nCoV or ((new or novel or wuhan) adj3 coronavirus) or covid19 or covid-19 or SARS-CoV-2).mp.

BioRxiv/MedRxiv

ncov or corona or wuhan or COVID or SARS-CoV-2

With the kind support of the [Public Health & Primary Care Library PHC](#), and following guidance of the [Medical Library Association](#)

**Update #2: 01.04.2020**

From 01.04.2020, we retrieve the currate BioRxiv/MedRxiv dataset [Link](#)

**Update #3: 29.04.2020**MEDLINE

("coronavirus"[MH] OR "coronavirus infections"[MH] OR "coronavirus"[TW] OR "corona virus"[TW] OR "HCoV"[TW] OR "nCoV"[TW] OR "covid"[TW] OR "covid19"[TW] OR "Severe Acute Respiratory Syndrome Coronavirus 2"[TW] OR "SARS-CoV2"[TW] OR "SARS-CoV 2"[TW] OR "SARS Coronavirus 2"[TW] OR "MERS-CoV"[TW]) AND (2019/1/1:3000[PDAT])

**Update #4: 01.05.2020**EMBASE

(SARS coronavirus/ or middle east respiratory syndrome/ or severe acute respiratory syndrome/ or (coronavirus\* or corona virus\* or HCoV\* or nCoV\* or covid or covid19 or sars-cov\* or sarscov\* or Sars-coronavirus\* or Severe Acute Respiratory Syndrome Coronavirus\*).mp.) and 20191201:20301231.(dc).

**Update #5: 30.10.2020**EMBASE

(exp SARS-related coronavirus/ or severe acute respiratory syndrome/ or coronavirus disease 2019/ or (coronavir\* or corona virus\* or HCoV\* or nCoV\* or 2019 cov or covid or covid19 or sars-cov\* or sarscov\* or sars-coronavirus\* or Severe Acute Respiratory Syndrome Coronavirus\* or nCoV).mp.) and 20191101:20301231.(dc).

MEDLINE

("severe acute respiratory syndrome coronavirus 2"[Supplementary Concept] OR "COVID-19" [Supplementary Concept] OR "coronavirus" OR "corona virus" OR "HCoV" OR "nCoV" OR "2019 CoV" OR "covid" OR "covid19" OR "Severe Acute Respiratory Syndrome Coronavirus 2" OR "SARS-CoV2" OR "SARS-CoV 2" OR "SARS Coronavirus 2") AND (2019/11/01:3000/12/31[PDAT])

## Supplementary file 2. Method for critical appraisal of empirical studies

### Method used for critical appraisal of empirical epidemiologic studies

|                                                                                                                                                                                                                                                                                                                                                                                                                                                          |
|----------------------------------------------------------------------------------------------------------------------------------------------------------------------------------------------------------------------------------------------------------------------------------------------------------------------------------------------------------------------------------------------------------------------------------------------------------|
| <b>Confounding</b>                                                                                                                                                                                                                                                                                                                                                                                                                                       |
| Have the authors <u>identified</u> all important confounding factors? <b>Yes / No / Unclear</b>                                                                                                                                                                                                                                                                                                                                                          |
| Were the identified confounding factors <u>adjusted</u> for in the design and/or analysis? <b>Yes / No / Unclear</b><br><ul style="list-style-type: none"> <li>- Model-based adjustment of confounders</li> <li>- Stratification</li> <li>- Matching</li> <li>- No adjustment required (randomization)</li> </ul>                                                                                                                                        |
| <b>Selection bias</b>                                                                                                                                                                                                                                                                                                                                                                                                                                    |
| Was patient exposure / intervention status <u>at inclusion</u> likely to result in bias? <b>Yes / No / Unclear</b><br><ul style="list-style-type: none"> <li>- Non-randomized study</li> <li>- Randomized study with issues regarding allocation concealment or non-random sequencing</li> <li>- Stringent exclusion criteria</li> </ul>                                                                                                                 |
| Was missing data or loss to follow-up <u>during the study</u> likely to result in bias? <b>Yes / No / Unclear</b><br><ul style="list-style-type: none"> <li>- Missingness likely not completely at random (i.e. not MCAR or % of missingness different between groups)</li> <li>- No methods described for handling missingness (i.e. imputation)</li> <li>- Other methods explored to prevent missingness (i.e. cross checking data sources)</li> </ul> |
| <b>Information bias</b>                                                                                                                                                                                                                                                                                                                                                                                                                                  |
| Was measurement of exposure / administration of the <u>intervention</u> likely to result in bias? <b>Yes / No / Unclear</b><br><ul style="list-style-type: none"> <li>- Blinding</li> <li>- Standardization</li> <li>- Objective</li> <li>- Non-compliance</li> <li>- Breaking protocol</li> </ul>                                                                                                                                                       |
| Was measurement of <u>outcome</u> likely to result in bias? <b>Yes / No / Unclear</b><br><ul style="list-style-type: none"> <li>- Blinding</li> <li>- Standardization</li> <li>- Objective (note: if this is the case item should be scored 'No')</li> </ul>                                                                                                                                                                                             |
| <b>Other concerns? FREE TEXT</b>                                                                                                                                                                                                                                                                                                                                                                                                                         |
| Items to consider (but not limited to)<br><ul style="list-style-type: none"> <li>- Reporting bias</li> <li>- Conflict of interest</li> </ul>                                                                                                                                                                                                                                                                                                             |

## Supplementary file 3. Method for critical appraisal of model-based studies

### Method used for critical appraisal of model based studies

**Were empirical distributions used for a varying infectiousness since time of infection?****Yes / No / Unclear**

Keywords indicating distributions were used

- Weibull
- Log-normal
- Exponential distribution

**Were various different scenarios evaluated for important model assumptions and parameter values? Yes / No / Unclear**

Keywords indicating uncertainty was taken into account

- Sensitivity analysis
- Scenario analysis

**Were models reported transparently? (i.e. no black box) Yes / No / Unclear**

Key elements indicating that model can be reproduced

- (differential) Equation specified
- Behavior of agents specified
- Graphic representation of model
- All variables and distributions specified

**Other concerns? FREE TEXT**

Items to consider (but not limited to)

- Reporting bias
- Conflict of interest
- Illogical properties of the model not captured by the criteria above

## Supplementary file 4. Flowchart study selection

Flowchart regarding selection of studies looking at effectiveness of contact- and tracing apps for SARS-CoV-2

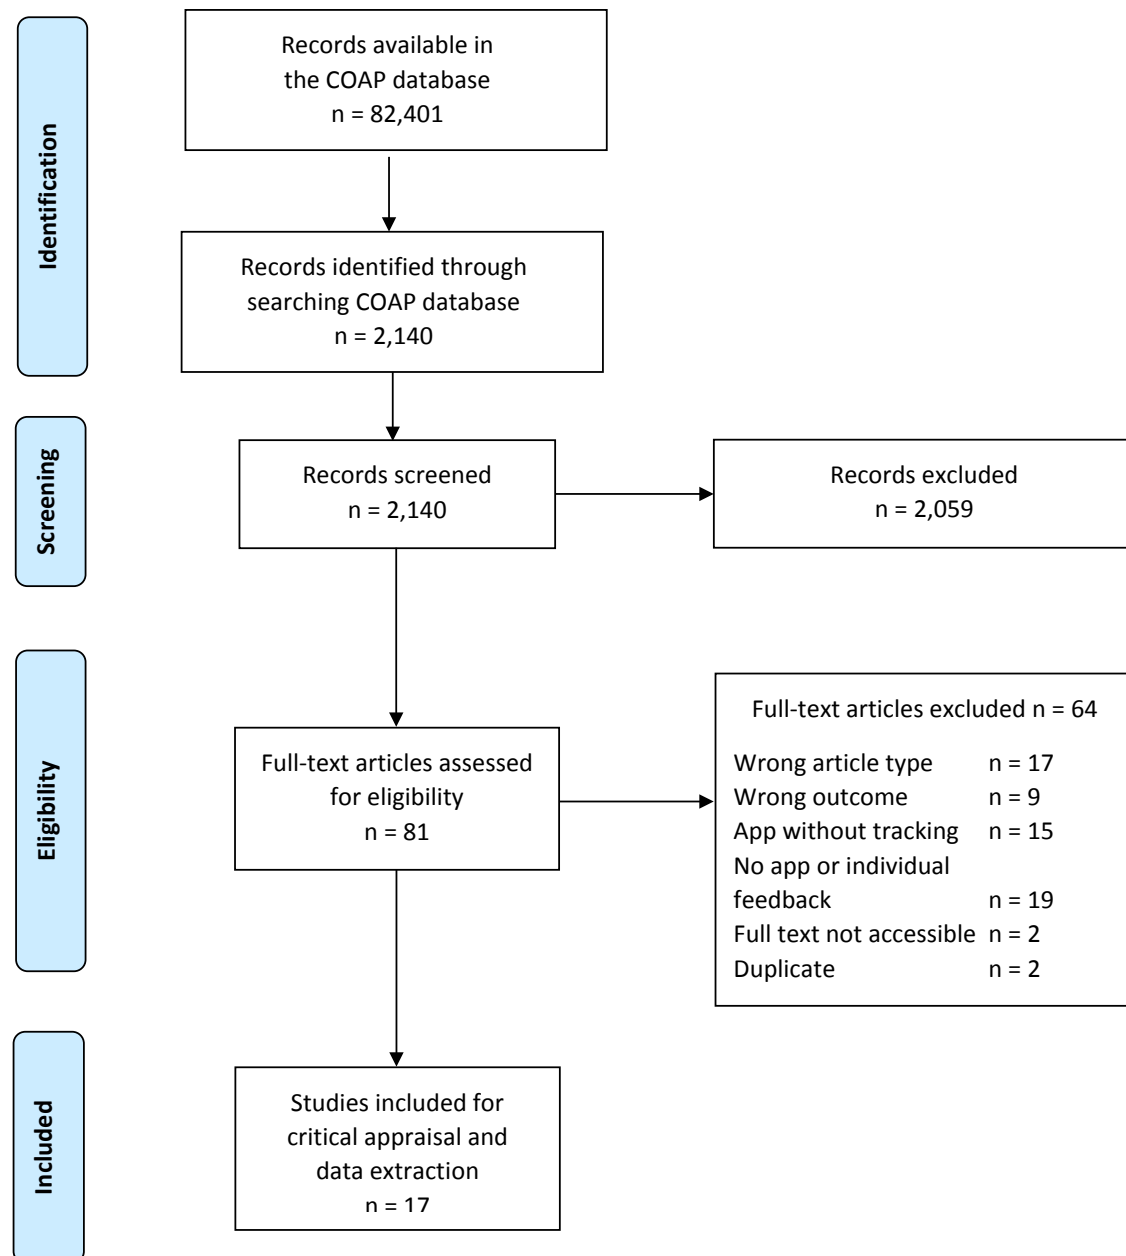

## Supplementary file 5. Excluded studies

### Studies not meeting inclusion criteria after full text screening, and excluded from analyses (n=64)

| Reference                  | Reason for exclusion          |
|----------------------------|-------------------------------|
| <b>Aleta 2020</b>          | No app or individual feedback |
| <b>Aleta 2020</b>          | No app or individual feedback |
| <b>Ayres 2020</b>          | Wrong outcome                 |
| <b>Bian 2020</b>           | Wrong article type            |
| <b>Bianconi 2020</b>       | Full text not accessible      |
| <b>Braithwaite 2020</b>    | Wrong article type            |
| <b>Braithwaite 2020</b>    | Duplicate                     |
| <b>Braun 2020</b>          | Full text not accessible      |
| <b>Brooks-Pollock 2020</b> | No app or individual feedback |
| <b>Chan 2020</b>           | Wrong article type            |
| <b>Chen 2020</b>           | No app or individual feedback |
| <b>Di Domenico 2020</b>    | No app or individual feedback |
| <b>Drake 2020</b>          | Wrong article type            |
| <b>Drew 2020</b>           | App without tracking          |
| <b>Fateh-Moghadam 2020</b> | App without tracking          |
| <b>Fenton 2020</b>         | Wrong outcome                 |
| <b>Firth 2020</b>          | No app or individual feedback |
| <b>Gozzi 2020</b>          | App without tracking          |
| <b>Grantz 2020</b>         | Wrong outcome                 |
| <b>Güemes 2020</b>         | App without tracking          |
| <b>Haller 2020</b>         | Wrong article type            |
| <b>Huang 2020</b>          | Wrong outcome                 |
| <b>Hussein 2020</b>        | No app or individual feedback |
| <b>Jian 2020</b>           | Wrong outcome                 |
| <b>Kassaye 2020</b>        | App without tracking          |
| <b>Kendall 2020</b>        | Duplicate                     |
| <b>Khataee 2020</b>        | Wrong article type            |
| <b>Kogan 2020</b>          | Wrong outcome                 |
| <b>Kretzschmar 2020</b>    | Duplicate                     |
| <b>Lambert 2020</b>        | Wrong article type            |
| <b>Leith 2020</b>          | Wrong article type            |
| <b>Liu 2020</b>            | No app or individual feedback |
| <b>Maghdid 2020</b>        | Wrong article type            |
| <b>Marín-García 2020</b>   | Wrong article type            |
| <b>Menni 2020</b>          | App without tracking          |
| <b>Menni 2020</b>          | App without tracking          |
| <b>Milenkovic 2020</b>     | No app or individual feedback |
| <b>Mishra 2020</b>         | App without tracking          |
| <b>Morley 2020</b>         | No app or individual feedback |

|                          |                               |
|--------------------------|-------------------------------|
| <b>Nagarajan 2020</b>    | No app or individual feedback |
| <b>Ni Lochlainn 2020</b> | App without tracking          |
| <b>Pépin 2020</b>        | Wrong outcome                 |
| <b>Petrellis 2020</b>    | Wrong article type            |
| <b>Ranjan 2020</b>       | App without tracking          |
| <b>Ruediger 2020</b>     | No app or individual feedback |
| <b>Salathe 2020</b>      | Wrong outcome                 |
| <b>Sattler 2020</b>      | Wrong article type            |
| <b>Serafino 2020</b>     | App without tracking          |
| <b>Sun 2020</b>          | App without tracking          |
| <b>Sun 2020</b>          | No app or individual feedback |
| <b>Szocska 2020</b>      | No app or individual feedback |
| <b>Unwin 2020</b>        | No app or individual feedback |
| <b>Vannoni 2020</b>      | No app or individual feedback |
| <b>Varsavsky 2020</b>    | No app or individual feedback |
| <b>Vinceti 2020</b>      | App without tracking          |
| <b>Wallentin 2020</b>    | Wrong article type            |
| <b>Whaiduzzaman 2020</b> | Wrong article type            |
| <b>Wilson 2020</b>       | Wrong article type            |
| <b>Wong 2020</b>         | Wrong article type            |
| <b>Yabe 2020</b>         | No app or individual feedback |
| <b>Yap 2020</b>          | Wrong outcome                 |
| <b>Yasaka 2020</b>       | Wrong article type            |
| <b>Zens 2020</b>         | App without tracking          |
| <b>Zhan 2020</b>         | No app or individual feedback |
|                          |                               |
